# Supplementary material for: Machine-learning-derived online prediction models of outcomes for patients with cholelithiasis-induced acute cholangitis: development and validation in two retrospective cohorts
Source: PubMed Central journal article supplement — eClinicalMedicine. 2024 Sep 5;76:102820. doi: 10.1016/j.eclinm.2024.102820 (PMC11405916; doi:10.1016/j.eclinm.2024.102820), 2024-09-05
Supplement: mmc1.pdf [file mmc1.pdf]

# SUPPLEMENTARY FIGURES

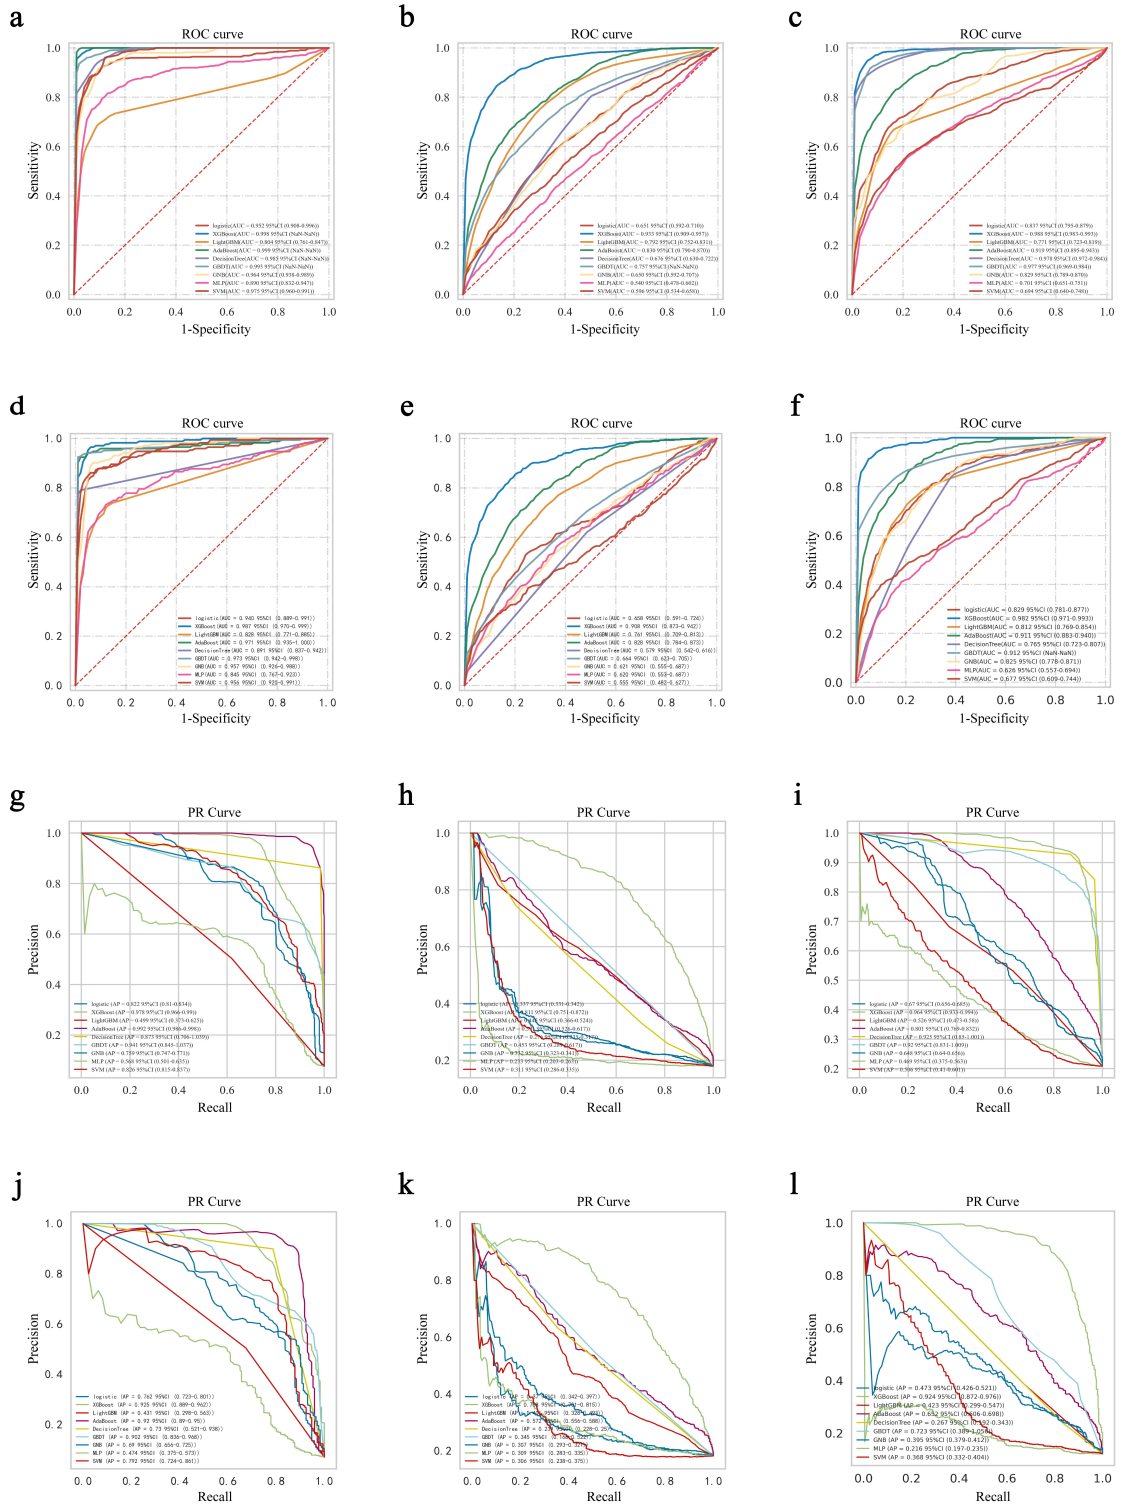

**Supplementary Figure S1.**

Receiver operating characteristic curve (a-f) and Precision-Recall curve (g-l) of the nine models. Outcomes of patients admitted to the ICU: in-hospital mortality (a, g), re-admission within 30 days after discharge (b, h), and mortality within 180 days after discharge (c, i). Outcomes of patients underwent biliary drainage during ICU treatment: in-hospital mortality (d, j), re-admission within 30 days after discharge (e, k), and mortality within 180 days after discharge (f, l).

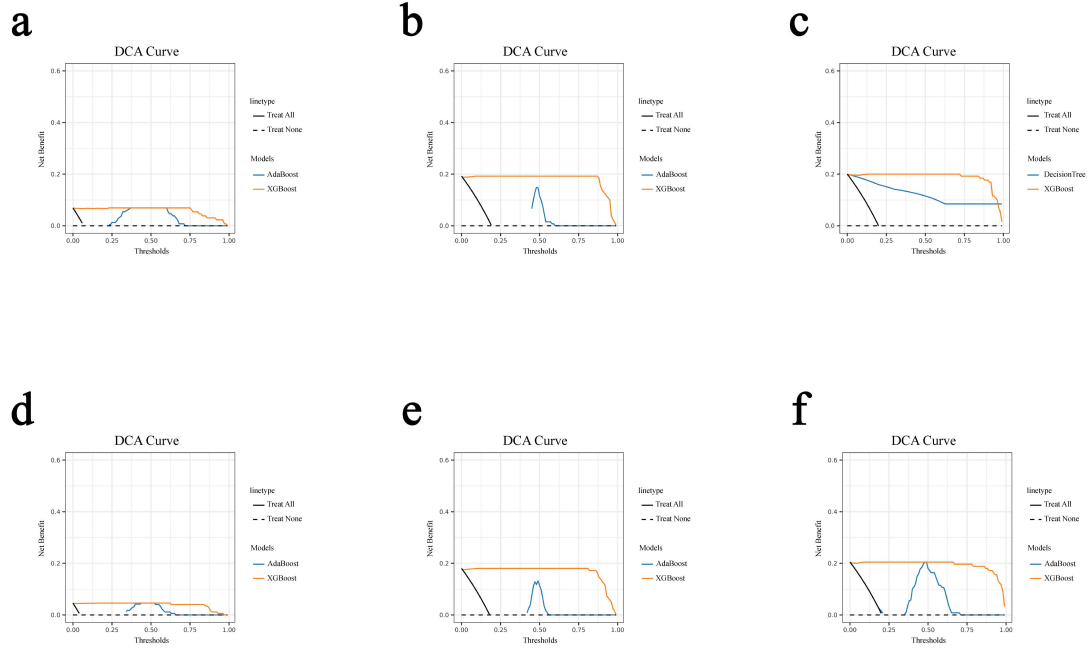

**Supplementary Figure S2.**

The decision curve analyses of XGBoost and the model with the most disputable predictive efficacy apart from XGBoost. Outcomes of patients admitted to the ICU (a-c): in-hospital mortality, re-admission within 30 days after discharge, and mortality within 180 days after discharge. Outcomes of patients underwent biliary drainage during ICU treatment (d-f).

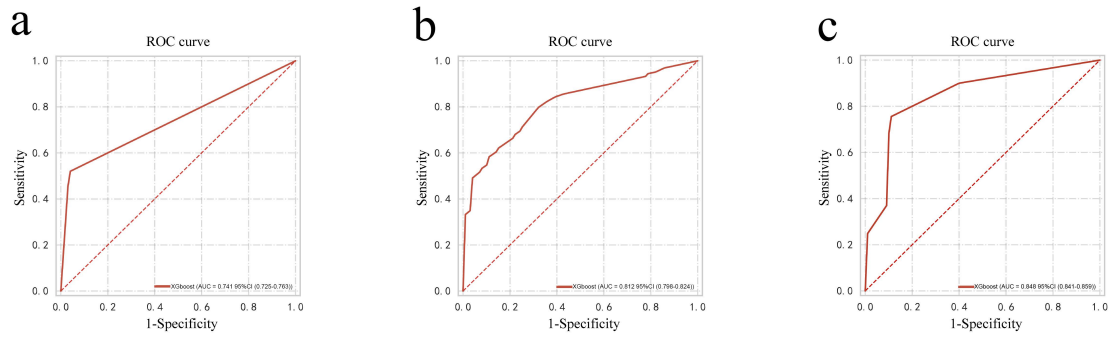

**Supplementary Figure S3.**

Receiver operating characteristic curve of the XGBoost in external validation set. Outcomes of patients underwent biliary drainage during ICU treatment in Zhongda Hospital: in-hospital mortality (a), re-admission within 30 days after discharge (b), and mortality within 180 days after discharge (c).

## SUPPLEMENTARY TABLES

**Supplementary Table S1. Baseline characteristics of patients admitted to the ICU (n=652).**

| Characteristics                                                                                           | n (%), mean $\pm$ SD (range), or Med [IQR] |
|-----------------------------------------------------------------------------------------------------------|--------------------------------------------|
| Age (years)                                                                                               | 79 [67-86]                                 |
| Male, n (%)                                                                                               | 328 (50.3%)                                |
| Female, n (%)                                                                                             | 324 (49.7%)                                |
| Length of stay in hospital (days)                                                                         | 7 [5-11]                                   |
| Length of stay in ICU (hours)                                                                             | 45.9 [29-84]                               |
| Re-admission within 1 month after discharge, n (%)                                                        | 117 (17.9%)                                |
| Death in hospital, n (%)                                                                                  | 50 (7.7%)                                  |
| Follow-up after discharge until death, n (%)                                                              | 240 (36.8%)                                |
| Death within 180 days after discharge, n (%)                                                              | 136 (20.9%)                                |
| Severity of cholangitis, n (%)                                                                            |                                            |
| Mild                                                                                                      | 45 (6.9%)                                  |
| Moderate                                                                                                  | 93 (14.3%)                                 |
| Severe                                                                                                    | 514 (78.8%)                                |
| Surgical operations, n (%)                                                                                | 191 (29.3%)                                |
| Endoscopy, n (%)                                                                                          | 580 (89%)                                  |
| Interventional operations, n (%)                                                                          | 74 (11.3%)                                 |
| Surgical or interventional or endoscopic operations, n (%)                                                | 614 (94.2%)                                |
| Endoscopy combined with surgical operations, n (%)                                                        | 163 (25%)                                  |
| Endoscopy combined with interventional operations, n (%)                                                  | 57 (8.7%)                                  |
| Endoscopy combined with another operations, n (%)                                                         | 200 (30.7%)                                |
| Surgical or interventional operations other than endoscopy, n (%)                                         | 34 (5.2%)                                  |
| Endoscopic, surgical, and interventional procedures were performed during a single hospitalization, n (%) | 20 (3.1%)                                  |
| Duration of intravenous antibiotic use (hours)                                                            | 160.5 [75.3-282.5]                         |
| Blood culture positive, n (%)                                                                             | 152 (23.3%)                                |
| Bile culture positive, n (%)                                                                              | 26 (4%)                                    |
| Hypertension, n (%)                                                                                       | 335 (51.4%)                                |
| Diabetes, n (%)                                                                                           | 210 (32.2%)                                |
| Acute pancreatitis, n (%)                                                                                 | 158 (2.8%)                                 |
| Anion gap _ max (mEq/L)                                                                                   | 17 [15-20]                                 |
| Anion gap _ avg (mEq/L)                                                                                   | 13.6 [12.2-15]                             |
| Anion gap _ min (mEq/L)                                                                                   | 11 [9-12]                                  |
| Bicarbonate _ max (mEq/L)                                                                                 | 28 [25-30]                                 |
| Bicarbonate _ avg (mEq/L)                                                                                 | 23.9 $\pm$ 3.5 (21.8-26)                   |
| Bicarbonate _ min (mEq/L)                                                                                 | 20 [17-23]                                 |
| Chloride _ max (mEq/L)                                                                                    | 110 [107-113]                              |
| Chloride _ avg (mEq/L)                                                                                    | 105.4 $\pm$ 4.2 (91-119.7)                 |
| Chloride _ min (mEq/L)                                                                                    | 101 [98-104]                               |
| Creatinine _ max (mg/dL)                                                                                  | 1.2 [0.9-1.9]                              |
| Creatinine _ avg (mg/dL)                                                                                  | 1 [0.7-1.4]                                |

|                             |                       |
|-----------------------------|-----------------------|
| Creatinine _ min (mg/dL)    | 0.8 [0.6-1.1]         |
| Glucose _ max (mg/dL)       | 153 [125-210.8]       |
| Glucose _ avg (mg/dL)       | 113.1 [99.4-132.6]    |
| Glucose _ min (mg/dL)       | 82 [71-93]            |
| Potassium _ max (mEq/L)     | 4.4 [4.1-4.9]         |
| Potassium _ avg (mEq/L)     | 3.8 [3.7-4.1]         |
| Potassium _ min (mEq/L)     | 3.3 [3.1-3.5]         |
| Sodium _ max (mEq/L)        | 142.5 [140-145]       |
| Sodium _ avg (mEq/L)        | 139.4±3.1 (128.3-150) |
| Sodium _ min (mEq/L)        | 136 [134-138]         |
| Urea nitrogen _ max (mg/dL) | 26 [18-41]            |
| Urea nitrogen _ avg (mg/dL) | 18.9 [12.7-29.8]      |
| Urea nitrogen _ min (mg/dL) | 12 [8-19]             |
| Hematocrit _ max (%)        | 36.2±4.6 (25.1-53.4)  |
| Hematocrit _ avg (%)        | 32±4.2 (17.4-46.1)    |
| Hematocrit _ min (%)        | 28.6±5.2 (10-43.4)    |
| Hemoglobin _ max (g/dL)     | 12±1.7 (8.3-18.3)     |
| Hemoglobin _ avg (g/dL)     | 10.6±1.5 (6.6-15.4)   |
| Hemoglobin _ min (g/dL)     | 9.5±1.8 (3.8-14.7)    |
| MCH _ max (pg)              | 31.1 [29.7-32.5]      |
| MCH _ avg (pg)              | 30.4 [29-31.7]        |
| MCH _ min (pg)              | 29.8 [28.3-31]        |
| MCHC _ max (%)              | 34.2 [33.3-35.1]      |
| MCHC _ avg (%)              | 33.2 [32.5-33.9]      |
| MCHC _ min (%)              | 32.3 [31.3-33]        |
| MCV _ max (fL)              | 93 [90-98]            |
| MCV _ avg (fL)              | 91.6±6.6 (67-123.7)   |
| MCV _ min (fL)              | 89 [86-93]            |
| PLT _ max (K/uL)            | 243 [174.3-356.8]     |
| PLT _ avg (K/uL)            | 184.6 [133.8-260.5]   |
| PLT _ min (K/uL)            | 142 [100-196]         |
| RDW _ max (%)               | 15.2 [14.3-16.6]      |
| RDW _ avg (%)               | 14.8 [13.9-15.9]      |
| RDW _ min (%)               | 14.3 [13.4-15.2]      |
| RBC _ max (m/uL)            | 4±0.6 (2.2-6.4)       |
| RBC _ avg (m/uL)            | 3.5±0.5 (2-5.4)       |
| RBC _ min (m/uL)            | 3.2±0.6 (1.5-5.1)     |
| WBC _ max (K/uL)            | 16.6 [12.1-22.7]      |
| WBC _ avg (K/uL)            | 11.1 [8.3-14.4]       |
| WBC _ min (K/uL)            | 7.1 [5.3-9.7]         |
| TBil _ max (mg/dL)          | 4.5 [2.4-6.6]         |
| TBil _ avg (mg/dL)          | 2.4 [1.5-4.2]         |
| TBil _ min (mg/dL)          | 1.1 [0.7-2.2]         |
| ALT _max (IU/L)             | 170 [84-326.3]        |

|                         |                    |
|-------------------------|--------------------|
| ALT _avg (IU/L)         | 99.4 [52.6-164.4]  |
| ALT _ min (IU/L)        | 47 [25-80]         |
| ALP _ max (IU/L)        | 260 [163-413]      |
| ALP _ avg (IU/L)        | 196 [133.7-296.4]  |
| ALP _ min (IU/L)        | 142 [102-222.8]    |
| AST _max (IU/L)         | 163.5 [83.3-334.5] |
| AST _avg (IU/L)         | 81.1 [48.4-137.2]  |
| AST _min (IU/L)         | 31 [22-48]         |
| Magnesium _ max (mg/dL) | 2.3 [2.1-2.5]      |
| Magnesium _ avg (mg/dL) | 2±0.2 (1.2-2.7)    |
| Magnesium _ min (mg/dL) | 1.6 [1.5-1.8]      |
| Calcium _ max (mg/dL)   | 8.7 [8.3-9.1]      |
| Calcium _ avg (mg/dL)   | 8.2±0.6 (5.1-10.6) |
| Calcium _ min (mg/dL)   | 7.6 [7.1-8]        |
| Phosphate _ max (mg/dL) | 3.7 [3.2-4.5]      |
| Phosphate _ avg (mg/dL) | 2.9 [2.5-3.3]      |
| Phosphate _ min (mg/dL) | 2 [1.7-2.5]        |
| INR(PT) _ max           | 1.4 [1.2-1.9]      |
| INR(PT) _ avg           | 1.3 [1.2-1.5]      |
| INR(PT) _ min           | 1.2 [1.1-1.3]      |
| PT _ max (seconds)      | 16 [14.1-20.4]     |
| PT _ avg (seconds)      | 14.6 [13.4-16.5]   |
| PT _ min (seconds)      | 13.2 [12.4-14.3]   |
| PTT _ max (seconds)     | 34.1 [29.2-47.2]   |
| PTT _ avg (seconds)     | 40 [27.2-37.6]     |
| PTT _ min (seconds)     | 27.4 [24.6-30.3]   |
| Lipase _ max (IU/L)     | 69.5 [21-570.5]    |
| Lipase _ avg (IU/L)     | 53.3 [19-263.9]    |
| Lipase _ min (IU/L)     | 25 [14-85]         |
| Basophils _ max (%)     | 0.3 [0.1-0.6]      |
| Basophils _ avg (%)     | 0.2 [0.1-0.3]      |
| Basophils _ min (%)     | 0.1 [0-0.2]        |
| Eosinophils _ max (%)   | 1 [0.2-2.5]        |
| Eosinophils _ avg (%)   | 0.6 [0.1-1.6]      |
| Eosinophils _ min (%)   | 0.2 [0-0.7]        |
| Lymphocytes _ max (%)   | 10 [5.9-15.1]      |
| Lymphocytes _ avg (%)   | 8 [4.9-11.6]       |
| Lymphocytes _ min (%)   | 5.7 [3-9.2]        |
| Monocytes _ max (%)     | 5 [3.3-7]          |
| Monocytes _ avg (%)     | 4.1 [3-5.5]        |
| Monocytes _ min (%)     | 3 [2-4.6]          |
| Neutrophils _ max (%)   | 87.9 [82.5-91.8]   |
| Neutrophils _ avg (%)   | 83.6 [78.7-88.4]   |
| Neutrophils _ min (%)   | 80 [72.2-87]       |

|                                                     |                         |
|-----------------------------------------------------|-------------------------|
| Albumin _ max (g/dL)                                | 3.2±0.6 (1.5-5.2)       |
| Albumin _ avg (g/dL)                                | 3±0.5 (1.3-4.5)         |
| Albumin _ min (g/dL)                                | 2.9 [2.4-3.2]           |
| LD _ max (IU/L)                                     | 262 [197-384.2]         |
| LD _ avg (IU/L)                                     | 224.5 [177.3-304.9]     |
| LD _ min (IU/L)                                     | 189 [153.7-247]         |
| PH _ max (units)                                    | 6 [5.3-6.5]             |
| PH _ avg (units)                                    | 5.8 [5.3-6.3]           |
| PH _ min (units)                                    | 5.5 [5-6.1]             |
| Specific gravity _ max                              | 1.018 [1.011-1.029]     |
| Specific gravity _ avg                              | 1.017 [1.012-1.026]     |
| Specific gravity _ min                              | 1.016 [1.010-1.026]     |
| Lactate _ max (mmol/L)                              | 2.1 [1.3-3.3]           |
| Lactate _ avg (mmol/L)                              | 1.7 [1.3-2.3]           |
| Lactate _ min (mmol/L)                              | 1.3 [1-1.8]             |
| Amylase _ max (IU/L)                                | 77.3 [30.3-276.2]       |
| Amylase _ avg (IU/L)                                | 78.5 [28.3-199.7]       |
| Amylase _ min (IU/L)                                | 55 [21-169.5]           |
| NLR _ avg                                           | 10.5 [6.8-17.6]         |
| PLR _ avg                                           | 24.3 [15.3-41.2]        |
| MLR _ avg                                           | 0.5 [0.3-0.8]           |
| SII _ avg (K/uL)                                    | 1991.8 [1242.9-3549.3]  |
| SIRI _ avg (%)                                      | 42.7 [28.2-64.2]        |
| GNRI _ avg                                          | 102.5±16.6 (45.4-162.4) |
| Weight (Kg)                                         | 77 [64.9-90.2]          |
| Height (cm)                                         | 165.3±10.5 (97.5-193.2) |
| BMI (kg/m2)                                         | 28.3 [24-33]            |
| APSIII score                                        | 49 [38-64]              |
| GCS score                                           | 15 [14-15]              |
| LODS score                                          | 4 [3-6]                 |
| MELD score                                          | 18 [14-24]              |
| OASIS score                                         | 32.5 [27-39.8]          |
| SIRS score                                          | 3 [2-4]                 |
| SOFA score                                          | 6 [4-8]                 |
| Sepsis, n (%)                                       | 405 (62.1%)             |
| AKI stage, n (%)                                    |                         |
| 0                                                   | 231 (35.4%)             |
| 1                                                   | 88 (13.5%)              |
| 2                                                   | 211 (32.4%)             |
| 3                                                   | 122 (18.7%)             |
| Renal replacement therapy, n (%)                    | 38 (5.8%)               |
| Duration of auxiliary ventilation (hours)           | 7.9 [0-40]              |
| Duration of vasopressor drug use (hours)            | 0 [0-6.2]               |
| Urine volume on the first day of ICU admission (ml) | 1277.5 [835-1988]       |

|                                                                       |                         |
|-----------------------------------------------------------------------|-------------------------|
| Duration of arterial catheterization (hours)                          | 0 [0-15.4]              |
| Duration of intravenous catheterization (hours)                       | 0 [0-50]                |
| Heart rate on the first day of ICU _ max (beats/minute)               | 100 [89-118.8]          |
| Heart rate on the first day of ICU _ avg (beats/minute)               | 84.2± 15.7 (41.4-137.1) |
| Heart rate on the first day of ICU _ min (beats/minute)               | 69 [60-79]              |
| SysBP on the first day of ICU _ max (mmHg)                            | 145 [131-161]           |
| SysBP on the first day of ICU _ avg (mmHg)                            | 114 [104.9-126.1]       |
| SysBP on the first day of ICU _ min (mmHg)                            | 89 [79-99]              |
| DiasBP on the first day of ICU _ max (mmHg)                           | 83 [72.3-96]            |
| DiasBP on the first day of ICU _ avg (mmHg)                           | 59.3± 9.9 (36.9-94.8)   |
| DiasBP on the first day of ICU _ min (mmHg)                           | 42± 11 (10-76)          |
| Mean arterial pressure on the first day of ICU admission _ max (mmHg) | 99 [88-113]             |
| Mean arterial pressure on the first day of ICU admission _ avg (mmHg) | 73 [67.4-81.1]          |
| Mean arterial pressure on the first day of ICU admission _ min (mmHg) | 55 [48-63]              |
| Respiratory rate on the first day of ICU _ max (mmHg)                 | 27 [24-31]              |
| Respiratory rate on the first day of ICU _ avg (mmHg)                 | 19.3 [17.2-22.3]        |
| Respiratory rate on the first day of ICU _ min (mmHg)                 | 13 [11-15]              |
| Temperature on the first day of ICU admission _ max (° C)             | 37.3 [37-37.8]          |
| Temperature on the first day of ICU admission _ avg (° C)             | 36.7 [36.5-37.1]        |
| Temperature on the first day of ICU admission _ min (° C)             | 36.3 [35.8-36.7]        |
| SpO2 on the first day of ICU _ max (%)                                | 100 [99-100]            |
| SpO2 on the first day of ICU _ avg (%)                                | 96.6 [95.3-97.8]        |
| SpO2 on the first day of ICU _ min (%)                                | 92 [90-94]              |
| Glucose on the first day of ICU admission _ max (mg/dl)               | 136 [108.3-174]         |
| Glucose on the first day of ICU admission _ avg (mg/dl)               | 119 [98-142.8]          |
| Glucose on the first day of ICU admission _ min (mg/dl)               | 101 [83-121]            |

---

\* SD, standard deviation; IQR, inter-quartile range; ICU, intensive care unit; MCH, mean corpuscular hemoglobin; MCHC, mean corpuscular hemoglobin concentration; MCV, mean corpuscular volume; PLT, platelet count; RDW, red blood cell distribution width; RBC, red blood cells; WBC, white blood cells; TBil, total bilirubin; ALT, alanine aminotransferase; ALP, alkaline phosphatase; AST, aspartate aminotransferase; INR(PT), international normalized ratio of prothrombin time; PT, prothrombin time; PTT, partial thromboplastin time; LD, lactate dehydrogenase; NLR, neutrophil-lymphocyte ratio; PLR, platelet-lymphocyte ratio; MLR, monocyte-lymphocyte ratio; SII, platelet\*neutrophil/lymphocyte; SIRI, neutrocyte\*monocyte/lymphocyte; GNRI, geriatric nutritional risk index; BMI, body mass index; APSIII, acute physiology score iii; GCS, glasgow coma scale; LODS, logistic organ dysfunction system; MELD, model for end-stage liver disease; OASIS, oxford acute severity of illness score; SIRS, systemic inflammatory response syndrome; SOFA, sepsis-related organ failure; AKI, acute kidney injury; SysBP, systolic blood pressure; DiasBP, diastolic blood pressure.



**Supplementary Table S2. Baseline characteristics of patients underwent operations during ICU treatment (n=614).**

| Characteristics                                                                                           | n (%), mean $\pm$ SD (range), or Med [IQR] |
|-----------------------------------------------------------------------------------------------------------|--------------------------------------------|
| Age (years)                                                                                               | 79 [67-86]                                 |
| Male, n (%)                                                                                               | 308 (50.2%)                                |
| Female, n (%)                                                                                             | 306 (49.8%)                                |
| Length of stay in hospital (days)                                                                         | 7 [5-10]                                   |
| Length of stay in ICU (hours)                                                                             | 45.9 [29-83.2]                             |
| Re-admission within 1 month after discharge, n (%)                                                        | 112 (18.2%)                                |
| Death in hospital, n (%)                                                                                  | 43 (7.0%)                                  |
| Follow-up after discharge until death, n (%)                                                              | 219 (35.7%)                                |
| Death within 180 days after discharge, n (%)                                                              | 122 (19.9%)                                |
| Severity of cholangitis, n (%)                                                                            |                                            |
| Mild                                                                                                      | 41 (6.7%)                                  |
| Moderate                                                                                                  | 88 (14.3%)                                 |
| Severe                                                                                                    | 485 (79.0%)                                |
| Surgical operations, n (%)                                                                                | 191 (31.1%)                                |
| Endoscopy, n (%)                                                                                          | 580 (94.4%)                                |
| Interventional operations, n (%)                                                                          | 74 (12.1%)                                 |
| Endoscopy combined with surgical operations, n (%)                                                        | 163 (26.5%)                                |
| Endoscopy combined with interventional operations, n (%)                                                  | 57 (9.3%)                                  |
| Endoscopy combined with another operations, n (%)                                                         | 200 (32.6%)                                |
| Surgical or interventional operations other than endoscopy, n (%)                                         | 34 (5.5%)                                  |
| Endoscopic, surgical, and interventional procedures were performed during a single hospitalization, n (%) | 20 (3.3%)                                  |
| Interval between admission and operation (Priority given to endoscopy) (days)                             | 0 [0-1]                                    |
| Duration of intravenous antibiotic use (hours)                                                            | 158.5 [75-281.5]                           |
| Blood culture positive, n (%)                                                                             | 147 (23.9%)                                |
| Bile culture positive, n (%)                                                                              | 26 (4.2%)                                  |
| Hypertension, n (%)                                                                                       | 320 (52.1%)                                |
| Diabetes, n (%)                                                                                           | 197 (32.1%)                                |
| Acute pancreatitis, n (%)                                                                                 | 140 (22.8%)                                |
| Anion gap _ max (mEq/L)                                                                                   | 17 [15-20]                                 |
| Anion gap _ avg (mEq/L)                                                                                   | 13.5 [12.2-15]                             |
| Anion gap _ min (mEq/L)                                                                                   | 11 [9-12]                                  |
| Bicarbonate _ max (mEq/L)                                                                                 | 28 [25-30]                                 |
| Bicarbonate _ avg (mEq/L)                                                                                 | 24.2 [21.9-26]                             |
| Bicarbonate _ min (mEq/L)                                                                                 | 20 [17-23]                                 |
| Chloride _ max (mEq/L)                                                                                    | 110 [107-113]                              |
| Chloride _ avg (mEq/L)                                                                                    | 105.2 [103-108]                            |
| Chloride _ min (mEq/L)                                                                                    | 101 [98-104]                               |
| Creatinine _ max (mg/dL)                                                                                  | 1.2 [0.9-1.8]                              |

|                             |                     |
|-----------------------------|---------------------|
| Creatinine _ avg (mg/dL)    | 1 [0.7-1.4]         |
| Creatinine _ min (mg/dL)    | 0.8 [0.6-1.1]       |
| Glucose _ max (mg/dL)       | 153 [125-207.8]     |
| Glucose _ avg (mg/dL)       | 113.1 [99.3-132.5]  |
| Glucose _ min (mg/dL)       | 82 [71-93]          |
| Potassium _ max (mEq/L)     | 4.4 [4.1-4.9]       |
| Potassium _ avg (mEq/L)     | 3.8 [3.7-4.1]       |
| Potassium _ min (mEq/L)     | 3.3 [3.1-3.5]       |
| Sodium _ max (mEq/L)        | 142 [140-145]       |
| Sodium _ avg (mEq/L)        | 139.3 [137.5-141.2] |
| Sodium _ min (mEq/L)        | 136 [134-138]       |
| Urea nitrogen _ max (mg/dL) | 26 [18-41]          |
| Urea nitrogen _ avg (mg/dL) | 18.8 [12.7-29.3]    |
| Urea nitrogen _ min (mg/dL) | 12 [8-19]           |
| Hematocrit _ max (%)        | 35.9 [33.2-39]      |
| Hematocrit _ avg (%)        | 31.8 [29.1-34.8]    |
| Hematocrit _ min (%)        | 28.7±5.2 (10-43.4)  |
| Hemoglobin _ max (g/dL)     | 11.9 [11-13.1]      |
| Hemoglobin _ avg (g/dL)     | 10.5 [9.7-11.6]     |
| Hemoglobin _ min (g/dL)     | 9.5±1.8 (3.8-14.7)  |
| MCH _ max (pg)              | 31.1 [29.8-32.5]    |
| MCH _ avg (pg)              | 30.4 [29.1-31.7]    |
| MCH _ min (pg)              | 29.8 [28.3-31.1]    |
| MCHC _ max (%)              | 34.2 [33.4-35.1]    |
| MCHC _ avg (%)              | 33.3 [32.5-34]      |
| MCHC _ min (%)              | 32.3 [31.3-33.1]    |
| MCV _ max (fL)              | 93 [90-98]          |
| MCV _ avg (fL)              | 91.2 [87.9-95.6]    |
| MCV _ min (fL)              | 90 [86-93]          |
| PLT _ max (K/uL)            | 243 [174.8-350.8]   |
| PLT _ avg (K/uL)            | 184.2 [133.7-257.4] |
| PLT _ min (K/uL)            | 142 [99.5-194.3]    |
| RDW _ max (%)               | 15.2 [14.3-16.6]    |
| RDW _ avg (%)               | 14.7 [13.8-15.8]    |
| RDW _ min (%)               | 14.3 [13.4-15.2]    |
| RBC _ max (m/uL)            | 4 [3.6-4.4]         |
| RBC _ avg (m/uL)            | 3.5 [3.2-3.9]       |
| RBC _ min (m/uL)            | 3.2±0.6 (1.5-5.1)   |
| WBC _ max (K/uL)            | 16.4 [12.1-22.4]    |
| WBC _ avg (K/uL)            | 11.1 [8.3-14.4]     |
| WBC _ min (K/uL)            | 7.2 [5.3-9.7]       |
| TBil _ max (mg/dL)          | 4.7 [2.7-6.6]       |
| TBil _ avg (mg/dL)          | 2.5 [1.6-4.3]       |
| TBil _ min (mg/dL)          | 1.2 [0.7-2.2]       |

|                        |                     |
|------------------------|---------------------|
| ALT _max (IU/L)        | 172.5 [89-332.3]    |
| ALT _avg (IU/L)        | 100.9 [55.9-164.7]  |
| ALT _min (IU/L)        | 48.5 [26-80]        |
| ALP _max (IU/L)        | 263 [167-423.3]     |
| ALP _avg (IU/L)        | 199.7 [135.1-300.7] |
| ALP _min (IU/L)        | 148 [103.8-224.8]   |
| AST _max (IU/L)        | 166 [86-337]        |
| AST _avg (IU/L)        | 83.2 [50-137.5]     |
| AST _min (IU/L)        | 31 [22-48.3]        |
| Magnesium _max (mg/dL) | 2.3 [2.1-2.5]       |
| Magnesium _avg (mg/dL) | 2 [1.8-2.1]         |
| Magnesium _min (mg/dL) | 1.6 [1.5-1.8]       |
| Calcium _max (mg/dL)   | 8.7 [8.3-9.1]       |
| Calcium _avg (mg/dL)   | 8.1 [7.9-8.5]       |
| Calcium _min (mg/dL)   | 7.6 [7.2-8]         |
| Phosphate _max (mg/dL) | 3.7 [3.2-4.4]       |
| Phosphate _avg (mg/dL) | 2.9 [2.5-3.3]       |
| Phosphate _min (mg/dL) | 2 [1.7-2.5]         |
| INR(PT) _max           | 1.4 [1.2-1.9]       |
| INR(PT) _avg           | 1.3 [1.2-1.5]       |
| INR(PT) _min           | 1.2 [1.1-1.3]       |
| PT _max (seconds)      | 16 [14.1-20.3]      |
| PT _avg (seconds)      | 14.6 [13.4-16.4]    |
| PT _min (seconds)      | 13.2 [12.4-14.3]    |
| PTT _max (seconds)     | 33.9 [29-46]        |
| PTT _avg (seconds)     | 30.9 [27-37.2]      |
| PTT _min (seconds)     | 27.3 [24.5-30.3]    |
| Lipase _max (IU/L)     | 65 [21-522.3]       |
| Lipase _avg (IU/L)     | 49.3 [19-246.6]     |
| Lipase _min (IU/L)     | 24 [14-80.3]        |
| Basophils _max (%)     | 0.2 [0.1-0.6]       |
| Basophils _avg (%)     | 0.2 [0.1-0.3]       |
| Basophils _min (%)     | 0.1 [0-0.2]         |
| Eosinophils _max (%)   | 1 [0.2-2.4]         |
| Eosinophils _avg (%)   | 0.6 [0.1-1.6]       |
| Eosinophils _min (%)   | 0.1 [0-0.6]         |
| Lymphocytes _max (%)   | 9.5 [5.7-15]        |
| Lymphocytes _avg (%)   | 7.8 [4.7-11.5]      |
| Lymphocytes _min (%)   | 5.7 [3-9.1]         |
| Monocytes _max (%)     | 5 [3.3-6.9]         |
| Monocytes _avg (%)     | 4 [3-5.5]           |
| Monocytes _min (%)     | 3 [2-4.6]           |
| Neutrophils _max (%)   | 88 [82.5-91.9]      |
| Neutrophils _avg (%)   | 83.6 [78.7-88.6]    |

|                                           |                        |
|-------------------------------------------|------------------------|
| Neutrophils _ min (%)                     | 80.2 [72.2-87.1]       |
| Albumin _ max (g/dL)                      | 3.2 [2.9-3.5]          |
| Albumin _ avg (g/dL)                      | 3 [2.7-3.3]            |
| Albumin _ min (g/dL)                      | 2.9 [2.5-3.2]          |
| LD _ max (IU/L)                           | 260 [195-380.3]        |
| LD _ avg (IU/L)                           | 224.3 [176.5-297]      |
| LD _ min (IU/L)                           | 188 [153-244.1]        |
| PH _ max (units)                          | 6 [5.2-6.5]            |
| PH _ avg (units)                          | 5.8 [5.3-6.3]          |
| PH _ min (units)                          | 5.5 [5-6]              |
| Specific gravity _ max                    | 1.018 [1.011-1.028]    |
| Specific gravity _ avg                    | 1.017 [1.012-1.026]    |
| Specific gravity _ min                    | 1.016 [1.011-1.026]    |
| Lactate _ max (mmol/L)                    | 2.1 [1.3-3.2]          |
| Lactate _ avg (mmol/L)                    | 1.7 [1.2-2.3]          |
| Lactate _ min (mmol/L)                    | 1.3 [1-1.8]            |
| Amylase _ max (IU/L)                      | 77 [31-252]            |
| Amylase _ avg (IU/L)                      | 72.6 [28-182.4]        |
| Amylase _ min (IU/L)                      | 52.5 [21-148.2]        |
| NLR _ avg                                 | 10.6 [6.9-18.1]        |
| PLR _ avg                                 | 24.2 [15.6-41.4]       |
| MLR _ avg                                 | 0.5 [0.3-0.8]          |
| SII _ avg (K/uL)                          | 1989.5 [1244.8-3547.6] |
| SIRI _ avg (%)                            | 43.9 [28.4-64.7]       |
| GNRI _ avg                                | 100.5 [90.1-111.9]     |
| Weight (Kg)                               | 77 [65-90]             |
| Height (cm)                               | 165.1 [159.3-172.6]    |
| BMI (kg/m2)                               | 28.2 [23.9-32.8]       |
| APSO score                                | 49 [38-64]             |
| GCS score                                 | 15 [14-15]             |
| LODS score                                | 4 [3-6]                |
| MELD score                                | 18 [14-24]             |
| OASIS score                               | 32 [27-39]             |
| SIRS score                                | 3 [2-4]                |
| SOFA score                                | 6 [4-8]                |
| Sepsis, n (%)                             | 383 (62.4%)            |
| AKI stage, n (%)                          |                        |
| 0                                         | 220 (35.8%)            |
| 1                                         | 82 (13.3%)             |
| 2                                         | 195 (31.8%)            |
| 3                                         | 117 (19.1%)            |
| Renal replacement therapy, n (%)          | 34 (5.5%)              |
| Duration of auxiliary ventilation (hours) | 7 [0-38]               |
| Duration of vasopressor drug use (hours)  | 0 [0-5.5]              |

|                                                                       |                     |
|-----------------------------------------------------------------------|---------------------|
| Urine volume on the first day of ICU admission (ml)                   | 1277.5 [835-1969]   |
| Duration of arterial catheterization (hours)                          | 0 [0-14.3]          |
| Duration of intravenous catheterization (hours)                       | 0 [0-49.1]          |
| Heart rate on the first day of ICU _ max (beats/minute)               | 100 [88-118]        |
| Heart rate on the first day of ICU _ avg (beats/minute)               | 82.2 [71.7-93.3]    |
| Heart rate on the first day of ICU _ min (beats/minute)               | 68 [60-79]          |
| SysBP on the first day of ICU _ max (mmHg)                            | 145 [131-161]       |
| SysBP on the first day of ICU _ avg (mmHg)                            | 114.3 [104.9-126.5] |
| SysBP on the first day of ICU _ min (mmHg)                            | 89 [79-99.1]        |
| DiasBP on the first day of ICU _ max (mmHg)                           | 82.5 [73-97]        |
| DiasBP on the first day of ICU _ avg (mmHg)                           | 58.4 [51.9-66]      |
| DiasBP on the first day of ICU _ min (mmHg)                           | 42 [35-49]          |
| Mean arterial pressure on the first day of ICU admission _ max (mmHg) | 99 [87-113]         |
| Mean arterial pressure on the first day of ICU admission _ avg (mmHg) | 73.1 [67.6-81.2]    |
| Mean arterial pressure on the first day of ICU admission _ min (mmHg) | 55 [48-63]          |
| Respiratory rate on the first day of ICU _ max (mmHg)                 | 27 [24-32]          |
| Respiratory rate on the first day of ICU _ avg (mmHg)                 | 19.3 [17.2-22.3]    |
| Respiratory rate on the first day of ICU _ min (mmHg)                 | 13 [11-15]          |
| Temperature on the first day of ICU admission _ max( C)               | 37.3 [36.9-37.8]    |
| Temperature on the first day of ICU admission _ avg ( C)              | 36.7 [36.5-37.1]    |
| Temperature on the first day of ICU admission _ min ( C)              | 36.3 [35.8-36.7]    |
| SpO2 on the first day of ICU _ max (%)                                | 100 [99-100]        |
| SpO2 on the first day of ICU _ avg (%)                                | 96.6 [95.3-97.8]    |
| SpO2 on the first day of ICU _ min (%)                                | 92 [90-94]          |
| Glucose on the first day of ICU admission _ max (mg/dl)               | 135 [108-173]       |
| Glucose on the first day of ICU admission _ avg (mg/dl)               | 118 [98-141.8]      |
| Glucose on the first day of ICU admission _ min (mg/dl)               | 101 [83-121]        |

---

\* SD, standard deviation; IQR, inter-quartile range; ICU, intensive care unit; MCH, mean corpuscular hemoglobin; MCHC, mean corpuscular hemoglobin concentration; MCV, mean corpuscular volume; PLT, platelet count; RDW, red blood cell distribution width; RBC, red blood cells; WBC, white blood cells; TBil, total bilirubin; ALT, alanine aminotransferase; ALP, alkaline phosphatase; AST, aspartate aminotransferase; INR(PT), international normalized ratio of prothrombin time; PT, prothrombin time; PTT, partial thromboplastin time; LD, lactate dehydrogenase; NLR, neutrophil-lymphocyte ratio; PLR, platelet-lymphocyte ratio; MLR, monocyte-lymphocyte ratio; SII, platelet\*neutrophil/lymphocyte; SIRI, neutrocyte\*monocyte/lymphocyte; GNRI, geriatric nutritional risk index; BMI, body mass index; APSIII, acute physiology score iii; GCS, glasgow coma scale; LODS, logistic organ dysfunction system; MELD, model for end-stage liver disease; OASIS, oxford acute severity of illness score; SIRS, systemic inflammatory response syndrome; SOFA, sepsis-related organ failure; AKI, acute kidney injury; SysBP, systolic blood pressure; DiasBP, diastolic blood pressure.

**Supplementary Table S3. Summary table of conversion relationship between variable data units collected from Zhongda Hospital and existing data units of MIMIC database.**

| Variables                                           | Zhongda hospital   | MIMIC database | Conversion formulas        |
|-----------------------------------------------------|--------------------|----------------|----------------------------|
| AKI stage                                           | -                  | -              | -                          |
| Duration of auxiliary ventilation                   | hour               | hour           | -                          |
| Duration of intravenous antibiotics use             | hour               | day            | 1 day = 24 hours           |
| Duration of vasopressor drug use                    | hour               | minute         | 1 hour = 60 minutes        |
| APSO score                                          | -                  | -              | -                          |
| LODS score                                          | -                  | -              | -                          |
| OASIS score                                         | -                  | -              | -                          |
| SOFA score                                          | -                  | -              | -                          |
| GCS score                                           | -                  | -              | -                          |
| SpO2 on the first day of ICU _ min                  | %                  | %              | -                          |
| Temperature on the first day of ICU admission _ min | °C                 | °C             | -                          |
| Albumin                                             | g/L                | g/dL           | 1 g/L = 10 g/dL            |
| ALP                                                 | IU/L               | IU/L           | -                          |
| Anion gap                                           | mEq/L              | mEq/L          | -                          |
| Bicarbonate                                         | mEq/L              | mEq/L          | -                          |
| Chloride                                            | mEq/L              | mEq/L          | -                          |
| Glucose                                             | mg/dL              | mg/dL          | -                          |
| Lactate                                             | mmol/L             | mmol/L         | -                          |
| Lipase                                              | IU/L               | IU/L           | -                          |
| MCHC                                                | %                  | %              | -                          |
| PH                                                  | unit               | unit           | -                          |
| Phosphate                                           | mg/dL              | mg/dL          | -                          |
| PTT                                                 | second             | second         | -                          |
| RDW                                                 | %                  | %              | -                          |
| TBil                                                | μ mol/L            | mg/dL          | 1mg/dL = 17.1 μ mol/L      |
| Urea nitrogen                                       | mg/dL              | mg/dL          | -                          |
| WBC                                                 | 10 <sup>9</sup> /L | K/uL           | 10 <sup>9</sup> /L = 1K/uL |

\* ICU, intensive care unit; AKI, acute kidney injury; APSIII, acute physiology score iii; LODS, logistic organ dysfunction system; OASIS, oxford acute severity of illness score; SOFA, sepsis-related organ failure; GCS, glasgow coma scale; ALP, alkaline phosphatase; MCHC, mean corpuscular hemoglobin concentration; PTT, partial thromboplastin time; RDW, red blood cell distribution width; TBil, total bilirubin; WBC, white blood cells.

**Supplementary Table S4. Analysis of factors leading to different outcomes of all the patients (n=1156).**

| Factors                                                                                                     | Outcomes                     |                                                           |                                                     |
|-------------------------------------------------------------------------------------------------------------|------------------------------|-----------------------------------------------------------|-----------------------------------------------------|
|                                                                                                             | Death in hospital<br>P value | Re-admission within 1<br>month after discharge<br>P value | Death within 180 days after<br>discharge<br>P value |
| Age                                                                                                         | 0.185                        | 0.021                                                     | <0.001                                              |
| Gender                                                                                                      | 0.538                        | 0.988                                                     | 0.194                                               |
| Length of stay in hospital                                                                                  | 0.009                        | 0.718                                                     | <0.001                                              |
| Length of stay in ICU                                                                                       | <0.001                       | <0.001                                                    | <0.001                                              |
| Severity of cholangitis                                                                                     | <0.001                       | 0.900                                                     | <0.001                                              |
| Surgical operations                                                                                         | 0.311                        | 0.554                                                     | 0.219                                               |
| Endoscopy                                                                                                   | 0.124                        | 0.479                                                     | 0.347                                               |
| Interventional operations                                                                                   | 0.126                        | 0.040                                                     | 0.031                                               |
| Surgical or interventional or<br>endoscopic operations                                                      | 0.078                        | 0.411                                                     | 0.055                                               |
| Endoscopy combined with<br>surgical operations                                                              | 0.262                        | 0.957                                                     | 0.280                                               |
| Endoscopy combined with<br>interventional operations                                                        | 0.802                        | 0.900                                                     | 0.060                                               |
| Endoscopy combined with<br>another operations                                                               | 0.600                        | 0.340                                                     | 0.736                                               |
| Surgical or interventional<br>operations other than endoscopy                                               | 0.760                        | 0.899                                                     | 0.489                                               |
| Endoscopic, surgical, and<br>interventional procedures were<br>performed during a single<br>hospitalization | 0.245                        | 0.874                                                     | 0.280                                               |
| Duration of intravenous<br>antibiotic use                                                                   | <0.001                       | 0.064                                                     | <0.001                                              |
| Blood culture results                                                                                       | 0.026                        | 0.770                                                     | 0.001                                               |
| Bile culture results                                                                                        | 0.060                        | 0.806                                                     | 0.201                                               |
| Hypertension                                                                                                | 0.590                        | 0.948                                                     | 0.983                                               |
| Diabetes                                                                                                    | 0.848                        | 0.398                                                     | 0.279                                               |
| Acute pancreatitis                                                                                          | 0.006                        | 0.060                                                     | 0.614                                               |
| Anion gap _ max                                                                                             | <0.001                       | 0.050                                                     | <0.001                                              |
| Anion gap _ avg                                                                                             | <0.001                       | 0.236                                                     | 0.001                                               |
| Anion gap _ min                                                                                             | 0.039                        | 0.591                                                     | 0.095                                               |
| Bicarbonate _ max                                                                                           | <0.001                       | 0.259                                                     | 0.026                                               |
| Bicarbonate _ avg                                                                                           | <0.001                       | 0.634                                                     | <0.001                                              |
| Bicarbonate _ min                                                                                           | <0.001                       | 0.236                                                     | <0.001                                              |
| Chloride _ max                                                                                              | <0.001                       | 0.003                                                     | <0.001                                              |
| Chloride _ avg                                                                                              | 0.095                        | 0.014                                                     | 0.065                                               |
| Chloride _ min                                                                                              | 0.759                        | 0.326                                                     | 0.311                                               |

|                     |        |       |        |
|---------------------|--------|-------|--------|
| Creatinine _ max    | <0.001 | 0.002 | <0.001 |
| Creatinine _ avg    | <0.001 | 0.007 | <0.001 |
| Creatinine _ min    | <0.001 | 0.029 | 0.001  |
| Glucose _ max       | <0.001 | 0.686 | <0.001 |
| Glucose _ avg       | <0.001 | 0.437 | 0.001  |
| Glucose _ min       | <0.001 | 0.819 | <0.001 |
| Potassium _ max     | <0.001 | 0.433 | <0.001 |
| Potassium _ avg     | <0.001 | 0.918 | <0.001 |
| Potassium _ min     | 0.472  | 0.844 | 0.037  |
| Sodium _ max        | 0.189  | 0.003 | 0.006  |
| Sodium _ avg        | 0.019  | 0.003 | 0.046  |
| Sodium _ min        | <0.001 | 0.066 | <0.001 |
| Urea nitrogen _ max | <0.001 | 0.029 | <0.001 |
| Urea nitrogen _ avg | <0.001 | 0.048 | <0.001 |
| Urea nitrogen _ min | <0.001 | 0.121 | <0.001 |
| Hematocrit _ max    | 0.972  | 0.455 | 0.007  |
| Hematocrit _ avg    | <0.001 | 0.648 | <0.001 |
| Hematocrit _ min    | <0.001 | 0.931 | <0.001 |
| Hemoglobin _ max    | 0.600  | 0.145 | <0.001 |
| Hemoglobin _ avg    | <0.001 | 0.224 | <0.001 |
| Hemoglobin _ min    | <0.001 | 0.523 | <0.001 |
| MCH _ max           | <0.001 | 0.875 | 0.507  |
| MCH _ avg           | 0.002  | 0.900 | 0.125  |
| MCH _ min           | 0.029  | 0.919 | 0.028  |
| MCHC _ max          | 0.624  | 0.013 | 0.001  |
| MCHC _ avg          | 0.030  | 0.047 | <0.001 |
| MCHC _ min          | <0.001 | 0.151 | <0.001 |
| MCV _ max           | <0.001 | 0.326 | <0.001 |
| MCV _ avg           | <0.001 | 0.250 | 0.052  |
| MCV _ min           | 0.071  | 0.169 | 0.890  |
| PLT _ max           | 0.013  | 0.446 | 0.458  |
| PLT _ avg           | <0.001 | 0.198 | 0.154  |
| PLT _ min           | <0.001 | 0.111 | <0.001 |
| RDW _ max           | <0.001 | 0.017 | <0.001 |
| RDW _ avg           | <0.001 | 0.005 | <0.001 |
| RDW _ min           | <0.001 | 0.002 | <0.001 |
| RBC _ max           | 0.103  | 0.094 | 0.005  |
| RBC _ avg           | <0.001 | 0.168 | <0.001 |
| RBC _ min           | <0.001 | 0.341 | <0.001 |
| WBC _ max           | <0.001 | 0.018 | <0.001 |
| WBC _ avg           | <0.001 | 0.037 | <0.001 |
| WBC _ min           | <0.001 | 0.124 | <0.001 |
| TBil _ max          | <0.001 | 0.424 | 0.001  |
| TBil _ avg          | <0.001 | 0.246 | 0.004  |



|                   |        |       |        |
|-------------------|--------|-------|--------|
| TBil _ min        | <0.001 | 0.218 | 0.025  |
| ALT _ max         | 0.985  | 0.001 | <0.001 |
| ALT _ avg         | 0.158  | 0.001 | <0.001 |
| ALT _ min         | 0.002  | 0.017 | <0.001 |
| ALP _ max         | 0.284  | 0.205 | <0.001 |
| ALP _ avg         | 0.532  | 0.187 | 0.003  |
| ALP _ min         | 0.002  | 0.108 | 0.421  |
| AST _ max         | 0.002  | 0.012 | 0.764  |
| AST _ avg         | 0.004  | 0.007 | 0.281  |
| AST _ min         | 0.004  | 0.104 | 0.018  |
| Magnesium _ max   | <0.001 | 0.593 | <0.001 |
| Magnesium _ avg   | 0.002  | 0.835 | <0.001 |
| Magnesium _ min   | 0.304  | 0.964 | 0.905  |
| Calcium _ max     | 0.883  | 0.858 | 0.439  |
| Calcium _ avg     | 0.019  | 0.547 | <0.001 |
| Calcium _ min     | <0.001 | 0.379 | <0.001 |
| Phosphate _ max   | <0.001 | 0.991 | <0.001 |
| Phosphate _ avg   | <0.001 | 0.113 | <0.001 |
| Phosphate _ min   | 0.403  | 0.003 | 0.270  |
| INR(PT) _ max     | <0.001 | 0.125 | <0.001 |
| INR(PT) _ avg     | <0.001 | 0.012 | <0.001 |
| INR(PT) _ min     | 0.022  | 0.059 | 0.025  |
| PT _ max          | <0.001 | 0.086 | <0.001 |
| PT _ avg          | <0.001 | 0.027 | <0.001 |
| PT _ min          | 0.008  | 0.310 | 0.002  |
| PTT _ max         | <0.001 | 0.311 | <0.001 |
| PTT _ avg         | <0.001 | 0.051 | <0.001 |
| PTT _ min         | 0.001  | 0.013 | 0.110  |
| Lipase _ max      | 0.103  | 0.026 | 0.673  |
| Lipase _ avg      | 0.038  | 0.101 | 0.957  |
| Lipase _ min      | 0.699  | 0.094 | 0.399  |
| Basophils _ max   | 0.676  | 0.299 | 0.885  |
| Basophils _ avg   | 0.010  | 0.149 | 0.004  |
| Basophils _ min   | <0.001 | 0.016 | <0.001 |
| Eosinophils _ max | 0.667  | 0.188 | 0.282  |
| Eosinophils _ avg | 0.004  | 0.027 | <0.001 |
| Eosinophils _ min | <0.001 | 0.003 | <0.001 |
| Lymphocytes _ max | 0.431  | 0.132 | 0.049  |
| Lymphocytes _ avg | 0.003  | 0.028 | <0.001 |
| Lymphocytes _ min | <0.001 | 0.007 | <0.001 |
| Monocytes _ max   | 0.007  | 0.026 | 0.047  |
| Monocytes _ avg   | 0.498  | 0.004 | 0.523  |
| Monocytes _ min   | <0.001 | 0.009 | <0.001 |
| Neutrophils _ max | <0.001 | 0.070 | <0.001 |

|                        |        |       |        |
|------------------------|--------|-------|--------|
| Neutrophils _ avg      | 0.021  | 0.160 | <0.001 |
| Neutrophils _ min      | 0.631  | 0.247 | 0.457  |
| Albumin _ max          | 0.002  | 0.373 | <0.001 |
| Albumin _ avg          | <0.001 | 0.686 | <0.001 |
| Albumin _ min          | <0.001 | 0.831 | <0.001 |
| LD _ max               | <0.001 | 0.745 | 0.001  |
| LD _ avg               | <0.001 | 0.725 | 0.005  |
| LD _ min               | <0.001 | 0.374 | 0.398  |
| PH _ max               | 0.839  | 0.207 | 0.165  |
| PH _ avg               | 0.049  | 0.021 | 0.001  |
| PH _ min               | <0.001 | 0.011 | <0.001 |
| Specific gravity _ max | 0.413  | 0.830 | 0.279  |
| Specific gravity _ avg | 0.332  | 0.614 | 0.856  |
| Specific gravity _ min | 0.006  | 0.406 | 0.075  |
| Lactate _ max          | <0.001 | 0.630 | <0.001 |
| Lactate _ avg          | <0.001 | 0.639 | <0.001 |
| Lactate _ min          | 0.110  | 0.813 | 0.109  |
| Amylase _ max          | 0.018  | 0.276 | 0.131  |
| Amylase _ avg          | <0.001 | 0.210 | 0.019  |
| Amylase _ min          | <0.001 | 0.512 | 0.046  |
| NLR _ avg              | 0.003  | 0.028 | <0.001 |
| PLR _ avg              | 0.835  | 0.330 | 0.025  |
| MLR _ avg              | 0.003  | 0.471 | 0.001  |
| SII _ avg              | 0.992  | 0.283 | 0.015  |
| SIRI _ avg             | 0.004  | 0.680 | <0.001 |

---

\*ICU, Intensive care unit; MCH, Mean Corpuscular Hemoglobin; MCHC, Mean Corpuscular Hemoglobin Concentration; MCV, Mean Corpuscular Volume; PLT, Platelet count; RDW, Red Cell Distribution Width; RBC, Red blood cells; WBC, White blood cells; TBil, Total bilirubin; ALT, Alanine Aminotransferase; ALP, Alkaline Phosphatase; AST, Aspartate Aminotransferase; INR(PT), International normalized ratio of prothrombin time; PT, Prothrombin time; PTT, Partial thromboplastin time; LD, Lactate dehydrogenase; NLR, Neutrophil-lymphocyte ratio; PLR, Platelet-lymphocyte ratio; MLR, Monocyte-lymphocyte ratio; SII, Platelet\*neutrophil/lymphocyte; SIRI, Neutrocyte\*monocyte/lymphocyte.

**Supplementary Table S5. Baseline characteristics of patients re-admitted within 30 days after discharge (n=262).**

| Characteristics                                                                                           | n (%), mean $\pm$ SD (range), or Med [IQR] |
|-----------------------------------------------------------------------------------------------------------|--------------------------------------------|
| Age (years)                                                                                               | 73 [62-84]                                 |
| Male, n (%)                                                                                               | 135 (51.5%)                                |
| Female, n (%)                                                                                             | 127 (48.5%)                                |
| Length of stay in hospital (days)                                                                         | 6 [4-8]                                    |
| Length of stay in ICU (hours)                                                                             | 0 [0-41.5]                                 |
| Re-admission within 30 days after discharge, n (%)                                                        | 262 (100%)                                 |
| Death in hospital, n (%)                                                                                  | 0 (0%)                                     |
| Follow-up after discharge until death, n (%)                                                              | 79 (30.2%)                                 |
| Death within 180 days after discharge, n (%)                                                              | 35 (13.4%)                                 |
| Severity of cholangitis, n (%)                                                                            |                                            |
| Mild                                                                                                      | 67 (25.6%)                                 |
| Moderate                                                                                                  | 31 (11.8%)                                 |
| Severe                                                                                                    | 164 (62.6%)                                |
| Surgical operations, n (%)                                                                                | 71 (27.1%)                                 |
| Endoscopy, n (%)                                                                                          | 229 (87.4%)                                |
| Interventional operations, n (%)                                                                          | 32 (23.7%)                                 |
| Surgical or interventional or endoscopic operations, n (%)                                                | 245 (93.5%)                                |
| Endoscopy combined with surgical operations, n (%)                                                        | 61 (23.3%)                                 |
| Endoscopy combined with interventional operations, n (%)                                                  | 24 (9.2%)                                  |
| Endoscopy combined with another operations, n (%)                                                         | 79 (30.2%)                                 |
| Surgical or interventional operations other than endoscopy, n (%)                                         | 16 (6.1%)                                  |
| Endoscopic, surgical, and interventional procedures were performed during a single hospitalization, n (%) | 6 (2.3%)                                   |
| Duration of intravenous antibiotic use (hours)                                                            | 133 [70-254.5]                             |
| Blood culture positive, n (%)                                                                             | 48 (18.3%)                                 |
| Bile culture positive, n (%)                                                                              | 9 (3.4%)                                   |
| Hypertension, n (%)                                                                                       | 135 (51.5%)                                |
| Diabetes, n (%)                                                                                           | 83 (31.7%)                                 |
| Acute pancreatitis, n (%)                                                                                 | 45 (17.2%)                                 |
| Anion gap _ max (mEq/L)                                                                                   | 16 [14-18]                                 |
| Anion gap _ avg (mEq/L)                                                                                   | 13.5 [12-14.7]                             |
| Anion gap _ min (mEq/L)                                                                                   | 11 [9-12]                                  |
| Bicarbonate _ max (mEq/L)                                                                                 | 27 [25-30]                                 |
| Bicarbonate _ avg (mEq/L)                                                                                 | 24.8 $\pm$ 3.2 (14.8-35.8)                 |
| Bicarbonate _ min (mEq/L)                                                                                 | 22 [19-24]                                 |
| Chloride _ max (mEq/L)                                                                                    | 107 [105-110]                              |
| Chloride _ avg (mEq/L)                                                                                    | 104 [102-107]                              |
| Chloride _ min (mEq/L)                                                                                    | 101 [98-104]                               |
| Creatinine _ max (mg/dL)                                                                                  | 1 [0.8-1.5]                                |
| Creatinine _ avg (mg/dL)                                                                                  | 0.8 [0.7-1.2]                              |

|                             |                        |
|-----------------------------|------------------------|
| Creatinine _ min (mg/dL)    | 0.7 [0.6-1]            |
| Glucose _ max (mg/dL)       | 140.5 [113-171.3]      |
| Glucose _ avg (mg/dL)       | 106 [96.2-125.8]       |
| Glucose _ min (mg/dL)       | 83.5 [71-96]           |
| Potassium _ max (mEq/L)     | 4.2 [4-4.6]            |
| Potassium _ avg (mEq/L)     | 3.8 [3.6-4]            |
| Potassium _ min (mEq/L)     | 3.4 [3.1-3.7]          |
| Sodium _ max (mEq/L)        | 141 [140-143]          |
| Sodium _ avg (mEq/L)        | 139 [137-140.8]        |
| Sodium _ min (mEq/L)        | 136 [134-139]          |
| Urea nitrogen _ max (mg/dL) | 19.5 [14-30]           |
| Urea nitrogen _ avg (mg/dL) | 15 [10.5-22.2]         |
| Urea nitrogen _ min (mg/dL) | 11 [7-16]              |
| Hematocrit _ max (%)        | 36.3 ± 5 (25.6-50.8)   |
| Hematocrit _ avg (%)        | 32.3 [29.7-36.6]       |
| Hematocrit _ min (%)        | 30.4 ± 5.3 (12.7-43.3) |
| Hemoglobin _ max (g/dL)     | 11.9 ± 1.8 (8.2-17)    |
| Hemoglobin _ avg (g/dL)     | 10.9 ± 1.7 (7.5-15.9)  |
| Hemoglobin _ min (g/dL)     | 10.1 ± 1.9 (3.8-15.2)  |
| MCH _ max (pg)              | 31.1 [29.5-32.2]       |
| MCH _ avg (pg)              | 30.6 [28.9-31.6]       |
| MCH _ min (pg)              | 29.9 [28.4-31.1]       |
| MCHC _ max (%)              | 33.8 ± 1.4 (30-37.8)   |
| MCHC _ avg (%)              | 33.1 [32.1-33.9]       |
| MCHC _ min (%)              | 32.3 [31.2-33.2]       |
| MCV _ max (fL)              | 93 [90-97.3]           |
| MCV _ avg (fL)              | 91.8 [88.5-95.4]       |
| MCV _ min (fL)              | 90 [87-94]             |
| PLT _ max (K/uL)            | 243.5 [171.8-340]      |
| PLT _ avg (K/uL)            | 200.4 [149.5-263.1]    |
| PLT _ min (K/uL)            | 170.4 ± 84.2 (6-600)   |
| RDW _ max (%)               | 15 [14-16.2]           |
| RDW _ avg (%)               | 14.6 [13.8-15.8]       |
| RDW _ min (%)               | 14.3 [13.5-15.4]       |
| RBC _ max (m/uL)            | 3.9 ± 0.6 (2.6-5.9)    |
| RBC _ avg (m/uL)            | 3.6 ± 0.6 (2.2-5.4)    |
| RBC _ min (m/uL)            | 3.3 ± 0.6 (1.5-5.2)    |
| WBC _ max (K/uL)            | 12.3 [8.4-19]          |
| WBC _ avg (K/uL)            | 8.9 [6.6-12.6]         |
| WBC _ min (K/uL)            | 6.4 [4.8-9.1]          |
| TBil _ max (mg/dL)          | 3.9 [1.6-6.2]          |
| TBil _ avg (mg/dL)          | 2.1 [1.2-3.9]          |
| TBil _ min (mg/dL)          | 1.1 [0.6-2.1]          |
| ALT _max (IU/L)             | 135 [76.8-238.5]       |

|                         |                    |
|-------------------------|--------------------|
| ALT _avg (IU/L)         | 86.7 [50.9-151.4]  |
| ALT _ min (IU/L)        | 48 [25-93]         |
| ALP _ max (IU/L)        | 249 [159.8-422.8]  |
| ALP _ avg (IU/L)        | 193 [133.1-328.6]  |
| ALP _ min (IU/L)        | 162 [103.8-270.5]  |
| AST _max (IU/L)         | 130 [69.8-243.3]   |
| AST _avg (IU/L)         | 70.5 [45.7-113.8]  |
| AST _min (IU/L)         | 33 [23-52]         |
| Magnesium _ max (mg/dL) | 2.2 [2-2.4]        |
| Magnesium _ avg (mg/dL) | 1.9 [1.8-2.1]      |
| Magnesium _ min (mg/dL) | 1.7 [1.5-1.9]      |
| Calcium _ max (mg/dL)   | 8.8 [8.3-9.2]      |
| Calcium _ avg (mg/dL)   | 8.3±0.5 (5.8-10.5) |
| Calcium _ min (mg/dL)   | 8 [7.5-8.4]        |
| Phosphate _ max (mg/dL) | 3.5 [3-4.3]        |
| Phosphate _ avg (mg/dL) | 2.9 [2.5-3.3]      |
| Phosphate _ min (mg/dL) | 2.3 [1.9-2.7]      |
| INR(PT) _ max           | 1.4 [1.2-1.9]      |
| INR(PT) _ avg           | 1.3 [1.2-1.5]      |
| INR(PT) _ min           | 1.2 [1.1-1.3]      |
| PT _ max (seconds)      | 15.7 [13.5-21]     |
| PT _ avg (seconds)      | 14.7 [13.1-16.7]   |
| PT _ min (seconds)      | 13.3 [12.2-14.5]   |
| PTT _ max (seconds)     | 34 [29.2-44.1]     |
| PTT _ avg (seconds)     | 32.1 [28.2-37.2]   |
| PTT _ min (seconds)     | 29.3 [26-32.5]     |
| Lipase _ max (IU/L)     | 43 [14-534]        |
| Lipase _ avg (IU/L)     | 37.8 [15.9-258]    |
| Lipase _ min (IU/L)     | 25 [13-83]         |
| Basophils _ max (%)     | 0.3 [0.1-0.7]      |
| Basophils _ avg (%)     | 0.2 [0.1-0.4]      |
| Basophils _ min (%)     | 0.2 [0-0.3]        |
| Eosinophils _ max (%)   | 1.4 [0.3-2.9]      |
| Eosinophils _ avg (%)   | 1.1 [0.3-2.3]      |
| Eosinophils _ min (%)   | 0.5 [0.1-2]        |
| Lymphocytes _ max (%)   | 11.2 [7.2-16.4]    |
| Lymphocytes _ avg (%)   | 9.8 [6.6-13.6]     |
| Lymphocytes _ min (%)   | 8 [5.3-11.1]       |
| Monocytes _ max (%)     | 5.5 [4-7.1]        |
| Monocytes _ avg (%)     | 4.8 [3.6-6.1]      |
| Monocytes _ min (%)     | 4.1 [2.9-5.5]      |
| Neutrophils _ max (%)   | 84.2 [80.2-89.3]   |
| Neutrophils _ avg (%)   | 81.8 [78-85.9]     |
| Neutrophils _ min (%)   | 79.1 [72.4-85]     |

|                        |                     |
|------------------------|---------------------|
| Albumin _ max (g/dL)   | 3.2±0.6 (1.6-4.7)   |
| Albumin _ avg (g/dL)   | 3.1±0.5 (1.4-4.7)   |
| Albumin _ min (g/dL)   | 3±0.6 (1.2-4.7)     |
| LD _ max (IU/L)        | 261.5[184-408.9]    |
| LD _ avg (IU/L)        | 225.1 [169.8-295]   |
| LD _ min (IU/L)        | 194 [146.5-265.3]   |
| PH _ max (units)       | 6 [5.5-6.7]         |
| PH _ avg (units)       | 6 [5.5-6.5]         |
| PH _ min (units)       | 6 [5.5-6.3]         |
| Specific gravity _ max | 1.019 [1.007-1.034] |
| Specific gravity _ avg | 1.018 [1.013-1.032] |
| Specific gravity _ min | 1.019 [1.011-1.031] |
| Lactate _ max (mmol/L) | 1.8 [1-2.8]         |
| Lactate _ avg (mmol/L) | 1.6 [1.1-2.2]       |
| Lactate _ min (mmol/L) | 1.3 [1-1.8]         |
| Amylase _ max (IU/L)   | 61 [12-306.5]       |
| Amylase _ avg (IU/L)   | 62.7 [19.9-187.6]   |
| Amylase _ min (IU/L)   | 50.5 [16.8-209.4]   |
| NLR _ avg              | 8.3 [5.9-12.9]      |
| PLR _ avg              | 21 [12.5-35]        |
| MLR _ avg              | 0.5 [0.3-0.7]       |
| SII _ avg (K/uL)       | 1720 [953.5-3039.3] |
| SIRI _ avg (%)         | 39.1 [27.4-61.1]    |

---

\* SD, standard deviation; IQR, inter-quartile range; ICU, intensive care unit; MCH, mean corpuscular hemoglobin; MCHC, mean corpuscular hemoglobin concentration; MCV, mean corpuscular volume; PLT, platelet count; RDW, red blood cell distribution width; RBC, red blood cells; WBC, white blood cells; TBil, total bilirubin; ALT, alanine aminotransferase; ALP, alkaline phosphatase; AST, aspartate aminotransferase; INR(PT), international normalized ratio of prothrombin time; PT, prothrombin time; PTT, partial thromboplastin time; LD, lactate dehydrogenase; NLR, neutrophil-lymphocyte ratio; PLR, platelet-lymphocyte ratio; MLR, monocyte-lymphocyte ratio; SII, platelet\*neutrophil/lymphocyte; SIRI, neutrocyte\*monocyte/lymphocyte.

**Supplementary Table S6. Analysis of factors for whether patients re-admitted within 30 days will die within 180 days after discharge (univariate logistic regression, n=262).**

| Factors                                                    | Univariate logistic regression |        |       |         |                       |
|------------------------------------------------------------|--------------------------------|--------|-------|---------|-----------------------|
|                                                            | $\beta$                        | S.E    | Z     | P value | OR (95%CI)            |
| Age                                                        | 0.06                           | 0.02   | 3.37  | <0.001  | 1.06 (1.02 - 1.09)    |
| Gender                                                     |                                |        |       |         |                       |
| 0                                                          |                                |        |       |         | 1.00 (Reference)      |
| 1                                                          | -0.40                          | 0.37   | -1.10 | 0.272   | 0.67 (0.33 - 1.37)    |
| Length of stay in hospital                                 | 0.02                           | 0.02   | 1.39  | 0.165   | 1.03 (0.99 - 1.06)    |
| Length of stay in ICU                                      | 0.00                           | 0.00   | 0.65  | 0.513   | 1.00 (1.00 - 1.00)    |
| Severity of cholangitis                                    |                                |        |       |         |                       |
| 1                                                          |                                |        |       |         | 1.00 (Reference)      |
| 2                                                          | 1.96                           | 1.18   | 1.66  | 0.096   | 7.07 (0.71 - 70.90)   |
| 3                                                          | 2.73                           | 1.03   | 2.66  | 0.008   | 15.38 (2.06 - 115.08) |
| Surgical operations                                        |                                |        |       |         |                       |
| 0                                                          |                                |        |       |         | 1.00 (Reference)      |
| 1                                                          | 0.08                           | 0.40   | 0.21  | 0.833   | 1.09 (0.49 - 2.40)    |
| Endoscopy                                                  |                                |        |       |         |                       |
| 0                                                          |                                |        |       |         | 1.00 (Reference)      |
| 1                                                          | 0.96                           | 0.75   | 1.27  | 0.203   | 2.61 (0.60 - 11.43)   |
| Interventional operations                                  |                                |        |       |         |                       |
| 0                                                          |                                |        |       |         | 1.00 (Reference)      |
| 1                                                          | 0.21                           | 0.52   | 0.40  | 0.688   | 1.23 (0.44 - 3.45)    |
| Surgical or interventional or endoscopic operations        |                                |        |       |         |                       |
| 0                                                          |                                |        |       |         | 1.00 (Reference)      |
| 1                                                          | 0.15                           | 0.78   | 0.20  | 0.842   | 1.17 (0.26 - 5.34)    |
| Endoscopy combined with surgical operations                |                                |        |       |         |                       |
| 0                                                          |                                |        |       |         | 1.00 (Reference)      |
| 1                                                          | 0.32                           | 0.41   | 0.79  | 0.428   | 1.38 (0.62 - 3.06)    |
| Endoscopy combined with interventional operations          |                                |        |       |         |                       |
| 0                                                          |                                |        |       |         | 1.00 (Reference)      |
| 1                                                          | 0.60                           | 0.54   | 1.12  | 0.265   | 1.82 (0.63 - 5.25)    |
| Endoscopy combined with another operations                 |                                |        |       |         |                       |
| 0                                                          |                                |        |       |         | 1.00 (Reference)      |
| 1                                                          | 0.51                           | 0.37   | 1.35  | 0.176   | 1.66 (0.80 - 3.46)    |
| Surgical or interventional operations other than endoscopy |                                |        |       |         |                       |
| 0                                                          |                                |        |       |         | 1.00 (Reference)      |
| 1                                                          | -15.77                         | 989.05 | -0.02 | 0.987   | 0.00 (0.00 - Inf)     |

|                                                                                                    |        |        |       |        |  |                     |
|----------------------------------------------------------------------------------------------------|--------|--------|-------|--------|--|---------------------|
| Endoscopic, surgical, and interventional procedures were performed during a single hospitalization |        |        |       |        |  |                     |
| 0                                                                                                  |        |        |       |        |  | 1.00 (Reference)    |
| 1                                                                                                  | 0.27   | 1.11   | 0.24  | 0.810  |  | 1.31 (0.15 - 11.52) |
| Duration of intravenous antibiotic use                                                             | 0.00   | 0.00   | 1.50  | 0.133  |  | 1.00 (1.00 - 1.00)  |
| Blood culture results                                                                              |        |        |       |        |  |                     |
| 0                                                                                                  |        |        |       |        |  | 1.00 (Reference)    |
| 1                                                                                                  | 0.69   | 0.41   | 1.66  | 0.097  |  | 1.99 (0.88 - 4.48)  |
| Bile culture results                                                                               |        |        |       |        |  |                     |
| 0                                                                                                  |        |        |       |        |  | 1.00 (Reference)    |
| 1                                                                                                  | -14.74 | 799.85 | -0.02 | 0.985  |  | 0.00 (0.00 - Inf)   |
| Hypertension                                                                                       |        |        |       |        |  |                     |
| 0                                                                                                  |        |        |       |        |  | 1.00 (Reference)    |
| 1                                                                                                  | 0.13   | 0.36   | 0.35  | 0.726  |  | 1.14 (0.56 - 2.32)  |
| Diabetes                                                                                           |        |        |       |        |  |                     |
| 0                                                                                                  |        |        |       |        |  | 1.00 (Reference)    |
| 1                                                                                                  | 0.56   | 0.37   | 1.51  | 0.130  |  | 1.75 (0.85 - 3.63)  |
| Acute pancreatitis                                                                                 |        |        |       |        |  |                     |
| 0                                                                                                  |        |        |       |        |  | 1.00 (Reference)    |
| 1                                                                                                  | -0.54  | 0.56   | -0.96 | 0.338  |  | 0.59 (0.20 - 1.75)  |
| Anion gap _ max                                                                                    | 0.11   | 0.05   | 2.38  | 0.017  |  | 1.12 (1.02 - 1.23)  |
| Anion gap _ avg                                                                                    | 0.13   | 0.09   | 1.49  | 0.137  |  | 1.14 (0.96 - 1.35)  |
| Anion gap _ min                                                                                    | 0.02   | 0.08   | 0.20  | 0.845  |  | 1.02 (0.87 - 1.18)  |
| Bicarbonate _ max                                                                                  | -0.03  | 0.05   | -0.60 | 0.552  |  | 0.97 (0.88 - 1.07)  |
| Bicarbonate _ avg                                                                                  | -0.08  | 0.06   | -1.31 | 0.190  |  | 0.93 (0.82 - 1.04)  |
| Bicarbonate _ min                                                                                  | -0.08  | 0.05   | -1.83 | 0.067  |  | 0.92 (0.84 - 1.01)  |
| Chloride _ max                                                                                     | 0.04   | 0.04   | 1.12  | 0.262  |  | 1.04 (0.97 - 1.12)  |
| Chloride _ avg                                                                                     | -0.01  | 0.04   | -0.33 | 0.743  |  | 0.99 (0.91 - 1.07)  |
| Chloride _ min                                                                                     | -0.04  | 0.03   | -1.16 | 0.245  |  | 0.96 (0.90 - 1.03)  |
| Creatinine _ max                                                                                   | 0.38   | 0.11   | 3.34  | <0.001 |  | 1.46 (1.17 - 1.81)  |
| Creatinine _ avg                                                                                   | 0.69   | 0.18   | 3.78  | <0.001 |  | 1.99 (1.39 - 2.83)  |
| Creatinine _ min                                                                                   | 0.96   | 0.29   | 3.30  | <0.001 |  | 2.62 (1.48 - 4.65)  |
| Glucose _ max                                                                                      | 0.00   | 0.00   | 0.26  | 0.792  |  | 1.00 (1.00 - 1.00)  |
| Glucose _ avg                                                                                      | -0.00  | 0.01   | -0.28 | 0.778  |  | 1.00 (0.99 - 1.01)  |
| Glucose _ min                                                                                      | -0.02  | 0.01   | -1.96 | 0.050  |  | 0.98 (0.97 - 0.99)  |
| Potassium _ max                                                                                    | 0.49   | 0.22   | 2.28  | 0.023  |  | 1.64 (1.07 - 2.51)  |
| Potassium _ avg                                                                                    | 0.72   | 0.51   | 1.40  | 0.160  |  | 2.06 (0.75 - 5.64)  |
| Potassium _ min                                                                                    | -0.56  | 0.49   | -1.14 | 0.254  |  | 0.57 (0.22 - 1.49)  |
| Sodium _ max                                                                                       | 0.07   | 0.05   | 1.32  | 0.185  |  | 1.07 (0.97 - 1.19)  |
| Sodium _ avg                                                                                       | -0.02  | 0.06   | -0.41 | 0.684  |  | 0.98 (0.87 - 1.10)  |
| Sodium _ min                                                                                       | -0.06  | 0.04   | -1.49 | 0.137  |  | 0.94 (0.87 - 1.02)  |



|                     |       |      |       |        |                       |
|---------------------|-------|------|-------|--------|-----------------------|
| Urea nitrogen _ max | 0.03  | 0.01 | 4.68  | <0.001 | 1.03 (1.02 - 1.05)    |
| Urea nitrogen _ avg | 0.05  | 0.01 | 4.88  | <0.001 | 1.05 (1.03 - 1.07)    |
| Urea nitrogen _ min | 0.06  | 0.01 | 4.36  | <0.001 | 1.06 (1.03 - 1.09)    |
| Hematocrit _ max    | -0.03 | 0.04 | -0.91 | 0.365  | 0.97 (0.90 - 1.04)    |
| Hematocrit _ avg    | -0.08 | 0.04 | -2.03 | 0.042  | 0.92 (0.85 - 0.99)    |
| Hematocrit _ min    | -0.07 | 0.03 | -2.11 | 0.035  | 0.93 (0.87 - 0.99)    |
| Hemoglobin _ max    | -0.23 | 0.11 | -2.10 | 0.036  | 0.79 (0.63 - 0.98)    |
| Hemoglobin _ avg    | -0.39 | 0.12 | -3.12 | 0.002  | 0.68 (0.53 - 0.87)    |
| Hemoglobin _ min    | -0.29 | 0.10 | -2.86 | 0.004  | 0.75 (0.62 - 0.91)    |
| MCH _ max           | -0.30 | 0.08 | -3.62 | <0.001 | 0.74 (0.63 - 0.87)    |
| MCH _ avg           | -0.33 | 0.09 | -3.85 | <0.001 | 0.72 (0.61 - 0.85)    |
| MCH _ min           | -0.34 | 0.09 | -3.93 | <0.001 | 0.71 (0.60 - 0.84)    |
| MCHC _ max          | -0.54 | 0.14 | -3.93 | <0.001 | 0.59 (0.45 - 0.76)    |
| MCHC _ avg          | -0.72 | 0.15 | -4.73 | <0.001 | 0.49 (0.36 - 0.66)    |
| MCHC _ min          | -0.61 | 0.13 | -4.64 | <0.001 | 0.54 (0.42 - 0.70)    |
| MCV _ max           | -0.03 | 0.03 | -1.04 | 0.299  | 0.97 (0.92 - 1.03)    |
| MCV _ avg           | -0.04 | 0.03 | -1.44 | 0.149  | 0.96 (0.90 - 1.02)    |
| MCV _ min           | -0.05 | 0.03 | -1.59 | 0.113  | 0.95 (0.89 - 1.01)    |
| PLT _ max           | 0.01  | 0.00 | 3.00  | 0.003  | 1.01 (1.01 - 1.01)    |
| PLT _ avg           | 0.01  | 0.00 | 2.87  | 0.004  | 1.01 (1.01 - 1.01)    |
| PLT _ min           | 0.01  | 0.00 | 2.38  | 0.017  | 1.01 (1.01 - 1.01)    |
| RDW _ max           | 0.32  | 0.09 | 3.76  | <0.001 | 1.38 (1.17 - 1.64)    |
| RDW _ avg           | 0.35  | 0.10 | 3.50  | <0.001 | 1.41 (1.16 - 1.72)    |
| RDW _ min           | 0.35  | 0.10 | 3.33  | <0.001 | 1.42 (1.15 - 1.74)    |
| RBC _ max           | -0.05 | 0.31 | -0.15 | 0.883  | 0.96 (0.52 - 1.76)    |
| RBC _ avg           | -0.46 | 0.34 | -1.34 | 0.179  | 0.63 (0.32 - 1.23)    |
| RBC _ min           | -0.43 | 0.29 | -1.48 | 0.139  | 0.65 (0.37 - 1.15)    |
| WBC _ max           | 0.07  | 0.02 | 3.47  | <0.001 | 1.07 (1.03 - 1.12)    |
| WBC _ avg           | 0.10  | 0.04 | 2.79  | 0.005  | 1.11 (1.03 - 1.19)    |
| WBC _ min           | 0.09  | 0.06 | 1.63  | 0.102  | 1.10 (0.98 - 1.22)    |
| TBil _ max          | 0.02  | 0.05 | 0.49  | 0.627  | 1.02 (0.93 - 1.12)    |
| TBil _ avg          | -0.02 | 0.07 | -0.33 | 0.739  | 0.98 (0.84 - 1.13)    |
| TBil _ min          | -0.13 | 0.14 | -0.99 | 0.321  | 0.87 (0.67 - 1.14)    |
| ALT _ max           | -0.00 | 0.00 | -0.22 | 0.822  | 1.00 (1.00 - 1.00)    |
| ALT _ avg           | -0.00 | 0.00 | -0.95 | 0.340  | 1.00 (0.99 - 1.00)    |
| ALT _ min           | -0.01 | 0.00 | -2.09 | 0.037  | 0.99 (0.98 - 0.99)    |
| ALP _ max           | 0.01  | 0.00 | 2.84  | 0.005  | 1.01 (1.01 - 1.01)    |
| ALP _ avg           | 0.01  | 0.00 | 2.76  | 0.006  | 1.01 (1.01 - 1.01)    |
| ALP _ min           | 0.01  | 0.00 | 3.05  | 0.002  | 1.01 (1.01 - 1.01)    |
| AST _ max           | 0.00  | 0.00 | 0.77  | 0.441  | 1.00 (1.00 - 1.00)    |
| AST _ avg           | -0.00 | 0.00 | -0.07 | 0.941  | 1.00 (1.00 - 1.00)    |
| AST _ min           | -0.01 | 0.01 | -1.69 | 0.091  | 0.99 (0.97 - 1.00)    |
| Magnesium _ max     | 1.32  | 0.50 | 2.66  | 0.008  | 3.74 (1.41 - 9.88)    |
| Magnesium _ avg     | 3.19  | 1.06 | 3.02  | 0.003  | 24.32 (3.06 - 193.08) |

|                        |       |      |       |        |                    |
|------------------------|-------|------|-------|--------|--------------------|
| Magnesium _ min        | 0.70  | 0.79 | 0.89  | 0.376  | 2.01 (0.43 - 9.46) |
| Calcium _ max          | -0.19 | 0.26 | -0.73 | 0.467  | 0.83 (0.50 - 1.37) |
| Calcium _ avg          | -0.87 | 0.35 | -2.50 | 0.012  | 0.42 (0.21 - 0.83) |
| Calcium _ min          | -0.68 | 0.24 | -2.83 | 0.005  | 0.51 (0.32 - 0.81) |
| Phosphate _ max        | 0.35  | 0.13 | 2.70  | 0.007  | 1.43 (1.10 - 1.84) |
| Phosphate _ avg        | 0.93  | 0.24 | 3.81  | <0.001 | 2.54 (1.57 - 4.10) |
| Phosphate _ min        | 0.71  | 0.29 | 2.42  | 0.015  | 2.03 (1.14 - 3.59) |
| INR(PT) _ max          | 0.18  | 0.11 | 1.58  | 0.114  | 1.20 (0.96 - 1.49) |
| INR(PT) _ avg          | 0.71  | 0.36 | 2.01  | 0.044  | 2.04 (1.02 - 4.10) |
| INR(PT) _ min          | -0.01 | 0.88 | -0.01 | 0.991  | 0.99 (0.17 - 5.61) |
| PT _ max               | 0.02  | 0.01 | 1.42  | 0.157  | 1.02 (0.99 - 1.04) |
| PT _ avg               | 0.07  | 0.04 | 2.04  | 0.042  | 1.08 (1.01 - 1.16) |
| PT _ min               | 0.03  | 0.08 | 0.31  | 0.753  | 1.03 (0.87 - 1.21) |
| PTT _ max              | 0.01  | 0.01 | 1.84  | 0.066  | 1.01 (1.00 - 1.02) |
| PTT _ avg              | 0.00  | 0.02 | 0.24  | 0.811  | 1.00 (0.97 - 1.04) |
| PTT _ min              | -0.04 | 0.03 | -1.13 | 0.259  | 0.96 (0.90 - 1.03) |
| Lipase _ max           | -0.00 | 0.00 | -0.28 | 0.782  | 1.00 (1.00 - 1.00) |
| Lipase _ avg           | -0.00 | 0.00 | -0.43 | 0.664  | 1.00 (1.00 - 1.00) |
| Lipase _ min           | 0.00  | 0.00 | 0.02  | 0.982  | 1.00 (1.00 - 1.00) |
| Basophils _ max        | -0.47 | 0.45 | -1.05 | 0.293  | 0.62 (0.26 - 1.50) |
| Basophils _ avg        | -0.84 | 0.74 | -1.14 | 0.254  | 0.43 (0.10 - 1.83) |
| Basophils _ min        | -0.31 | 0.80 | -0.39 | 0.693  | 0.73 (0.15 - 3.48) |
| Eosinophils _ max      | -0.21 | 0.11 | -1.85 | 0.064  | 0.81 (0.65 - 1.01) |
| Eosinophils _ avg      | -0.40 | 0.17 | -2.36 | 0.018  | 0.67 (0.48 - 0.93) |
| Eosinophils _ min      | -0.37 | 0.18 | -2.06 | 0.040  | 0.69 (0.49 - 0.98) |
| Lymphocytes _ max      | -0.09 | 0.03 | -2.80 | 0.005  | 0.92 (0.86 - 0.97) |
| Lymphocytes _ avg      | -0.16 | 0.05 | -3.57 | <0.001 | 0.85 (0.78 - 0.93) |
| Lymphocytes _ min      | -0.19 | 0.05 | -3.71 | <0.001 | 0.83 (0.75 - 0.91) |
| Monocytes _ max        | -0.13 | 0.07 | -1.76 | 0.079  | 0.88 (0.76 - 1.02) |
| Monocytes _ avg        | -0.17 | 0.09 | -1.77 | 0.077  | 0.85 (0.70 - 1.02) |
| Monocytes _ min        | -0.15 | 0.09 | -1.67 | 0.094  | 0.86 (0.72 - 1.03) |
| Neutrophils _ max      | 0.14  | 0.04 | 3.95  | <0.001 | 1.15 (1.07 - 1.24) |
| Neutrophils _ avg      | 0.13  | 0.03 | 3.88  | <0.001 | 1.14 (1.06 - 1.21) |
| Neutrophils _ min      | 0.07  | 0.02 | 2.97  | 0.003  | 1.07 (1.02 - 1.12) |
| Albumin _ max          | -0.75 | 0.34 | -2.17 | 0.030  | 0.47 (0.24 - 0.93) |
| Albumin _ avg          | -0.80 | 0.37 | -2.15 | 0.032  | 0.45 (0.22 - 0.93) |
| Albumin _ min          | -0.63 | 0.33 | -1.91 | 0.056  | 0.54 (0.28 - 1.01) |
| LD _ max               | -0.00 | 0.00 | -0.06 | 0.954  | 1.00 (1.00 - 1.00) |
| LD _ avg               | 0.00  | 0.00 | 0.46  | 0.643  | 1.00 (1.00 - 1.00) |
| LD _ min               | 0.00  | 0.00 | 0.51  | 0.610  | 1.00 (1.00 - 1.00) |
| PH _ max               | -0.10 | 0.18 | -0.55 | 0.584  | 0.90 (0.63 - 1.30) |
| PH _ avg               | -0.34 | 0.27 | -1.27 | 0.204  | 0.71 (0.42 - 1.20) |
| PH _ min               | -0.48 | 0.28 | -1.75 | 0.080  | 0.62 (0.36 - 1.06) |
| Specific gravity _ max | 3.73  | 8.28 | 0.45  | 0.653  | 41.58 (0.00 -      |

|                        |       |       |       |       |                                 |
|------------------------|-------|-------|-------|-------|---------------------------------|
|                        |       |       |       |       | 467464365.93)                   |
| Specific gravity _ avg | 1.40  | 11.04 | 0.13  | 0.899 | 4.07 (0.00 -<br>10113489067.05) |
| Specific gravity _ min | -3.14 | 12.14 | -0.26 | 0.796 | 0.04 (0.00 -<br>922968830.58)   |
| Lactate _ max          | 0.04  | 0.11  | 0.38  | 0.705 | 1.04 (0.84 - 1.28)              |
| Lactate _ avg          | 0.03  | 0.20  | 0.13  | 0.898 | 1.03 (0.70 - 1.51)              |
| Lactate _ min          | 0.12  | 0.24  | 0.49  | 0.624 | 1.12 (0.71 - 1.79)              |
| Amylase _ max          | -0.00 | 0.00  | -0.13 | 0.898 | 1.00 (1.00 - 1.00)              |
| Amylase _ avg          | -0.00 | 0.00  | -0.08 | 0.938 | 1.00 (1.00 - 1.00)              |
| Amylase _ min          | 0.00  | 0.00  | 0.32  | 0.749 | 1.00 (1.00 - 1.00)              |
| NLR _ avg              | 0.02  | 0.01  | 1.79  | 0.074 | 1.02 (1.00 - 1.03)              |
| PLR _ avg              | 0.01  | 0.01  | 2.74  | 0.006 | 1.02 (1.01 - 1.03)              |
| MLR _ avg              | 0.18  | 0.29  | 0.63  | 0.526 | 1.20 (0.68 - 2.12)              |
| SII _ avg              | 0.01  | 0.00  | 2.84  | 0.005 | 1.01 (1.01 - 1.01)              |
| SIRI _ avg             | 0.00  | 0.00  | 0.90  | 0.369 | 1.00 (1.00 - 1.01)              |

\* ICU, Intensive care unit; MCH, Mean corpuscular hemoglobin; MCHC, Mean corpuscular hemoglobin concentration; MCV, Mean corpuscular volume; PLT, Platelet count; RDW, Red cell distribution width; RBC, Red blood cells; WBC, White blood cells; TBil, Total bilirubin; ALT, Alanine aminotransferase; ALP, Alkaline phosphatase; AST, Aspartate aminotransferase; INR(PT), International normalized ratio of prothrombin time; PT, Prothrombin time; PTT, Partial thromboplastin time; LD, Lactate dehydrogenase; NLR, Neutrophil-lymphocyte ratio; PLR, Platelet-lymphocyte ratio; MLR, Monocyte-lymphocyte ratio; SII, Platelet\*neutrophil/lymphocyte; SIRI, Neutrocyte\*monocyte/lymphocyte.

**Supplementary Table S7. Analysis of factors for whether patients re-admitted within 30 days will die within 180 days after discharge (multivariate logistic regression analysis, n=262).**

| Factors                 | Univariate logistic | Multivariate logistic regression analysis |          |   |         |
|-------------------------|---------------------|-------------------------------------------|----------|---|---------|
|                         | regression          | $\beta$                                   | S.E      | Z | P value |
|                         | P value             |                                           |          |   |         |
| Severity of cholangitis |                     |                                           |          |   |         |
| 1                       |                     |                                           |          |   |         |
| 2                       | 0.096               | -40.45                                    | 40202.17 | 0 | 0.999   |
| 3                       | 0.008               | -69.83                                    | 38299.95 | 0 | 0.999   |
| Age                     | <0.001              | 5.7                                       | 1488.42  | 0 | 0.997   |
| Anion gap _ max         | 0.017               | -7.51                                     | 8353.31  | 0 | 0.999   |
| Creatinine _ max        | <0.001              | -131.86                                   | 118230.9 | 0 | 0.999   |
| Creatinine _ avg        | <0.001              | 341.51                                    | 293578.2 | 0 | 0.999   |
| Creatinine _ min        | <0.001              | -213.46                                   | 193902.6 | 0 | 0.999   |
| Glucose _ min           | 0.050               | 1.17                                      | 845.78   | 0 | 0.999   |
| Potassium _ max         | 0.023               | 39.06                                     | 59581.27 | 0 | 0.999   |
| Urea nitrogen _ max     | <0.001              | 5.44                                      | 6853.65  | 0 | 0.999   |
| Urea nitrogen _ avg     | <0.001              | -3.92                                     | 12609.83 | 0 | 1       |
| Urea nitrogen _ min     | <0.001              | -0.59                                     | 7094.77  | 0 | 1       |
| Hematocrit _ avg        | 0.042               | 19.89                                     | 64253.28 | 0 | 1       |
| Hematocrit _ min        | 0.035               | 21.03                                     | 18539.43 | 0 | 0.999   |
| Hemoglobin _ max        | 0.036               | 5.05                                      | 44487.22 | 0 | 1       |
| Hemoglobin _ avg        | 0.002               | -241.44                                   | 241800.9 | 0 | 0.999   |
| Hemoglobin _ min        | 0.004               | 111.48                                    | 67880.99 | 0 | 0.999   |
| MCH _ max               | <0.001              | -176.71                                   | 78215.01 | 0 | 0.998   |
| MCH _ avg               | <0.001              | -30.95                                    | 127861.6 | 0 | 1       |
| MCH _ min               | <0.001              | 200.67                                    | 68540.69 | 0 | 0.998   |
| MCHC _ max              | <0.001              | 231.61                                    | 61087.87 | 0 | 0.997   |
| MCHC _ avg              | <0.001              | -268.76                                   | 138756.2 | 0 | 0.998   |
| MCHC _ min              | <0.001              | 52.24                                     | 65509.74 | 0 | 0.999   |
| PLT _ max               | 0.003               | 0.93                                      | 512.63   | 0 | 0.999   |
| PLT _ avg               | 0.004               | -0.18                                     | 1589.05  | 0 | 1       |
| PLT _ min               | 0.017               | 0.02                                      | 1477.69  | 0 | 1       |
| RDW _ max               | <0.001              | 29.43                                     | 74577.72 | 0 | 1       |
| RDW _ avg               | <0.001              | 30.8                                      | 192712.9 | 0 | 1       |
| RDW _ min               | <0.001              | -26.75                                    | 131165   | 0 | 1       |
| WBC _ max               | <0.001              | 0.33                                      | 7385.93  | 0 | 1       |
| WBC _ avg               | 0.005               | -6.11                                     | 9546.91  | 0 | 0.999   |
| ALT _ min               | 0.037               | -0.15                                     | 264.71   | 0 | 1       |
| ALP _ max               | 0.005               | 0.58                                      | 261.99   | 0 | 0.998   |
| ALP _ avg               | 0.006               | -1.4                                      | 745.2    | 0 | 0.999   |
| ALP _ min               | 0.002               | 0.81                                      | 489.19   | 0 | 0.999   |

|                   |        |          |          |   |       |
|-------------------|--------|----------|----------|---|-------|
| Magnesium _ max   | 0.008  | -63.64   | 37930.84 | 0 | 0.999 |
| Magnesium _ avg   | 0.003  | 270.15   | 130386.5 | 0 | 0.998 |
| Calcium _ avg     | 0.012  | 149.68   | 69395.41 | 0 | 0.998 |
| Calcium _ min     | 0.005  | -171.58  | 47310.48 | 0 | 0.997 |
| Phosphate _ max   | 0.007  | 11.21    | 25532.67 | 0 | 1     |
| Phosphate _ avg   | <0.001 | -88.12   | 75304.97 | 0 | 0.999 |
| Phosphate _ min   | 0.015  | 124.65   | 86615.44 | 0 | 0.999 |
| INR(PT) _ avg     | 0.044  | -77.59   | 115200.2 | 0 | 0.999 |
| PT _ avg          | 0.042  | 13.21    | 11817.69 | 0 | 0.999 |
| Eosinophils _ avg | 0.018  | -91.49   | 34588.32 | 0 | 0.998 |
| Eosinophils _ min | 0.040  | 84.61    | 41897.51 | 0 | 0.998 |
| Lymphocytes _ max | 0.005  | -22.81   | 4967.7   | 0 | 0.996 |
| Lymphocytes _ avg | <0.001 | 70.64    | 20415.4  | 0 | 0.997 |
| Lymphocytes _ min | <0.001 | -46.85   | 13686.64 | 0 | 0.997 |
| Neutrophils _ max | <0.001 | -26.77   | 11914.86 | 0 | 0.998 |
| Neutrophils _ avg | <0.001 | 68.05    | 20908.51 | 0 | 0.997 |
| Neutrophils _ min | 0.003  | -27.54   | 6953.47  | 0 | 0.997 |
| Albumin _ max     | 0.030  | -196.91  | 58194.43 | 0 | 0.997 |
| Albumin _ avg     | 0.032  | 172.25   | 90601.49 | 0 | 0.998 |
| PLR _ avg         | 0.006  | -11.88   | 27364.7  | 0 | 1     |
| SII _ avg         | 0.005  | 0.11     | 277.66   | 0 | 1     |
| Intercept         |        | -2933.54 | 2050696  | 0 | 0.999 |

\* MCH, Mean corpuscular hemoglobin; MCHC, Mean corpuscular hemoglobin concentration; PLT, Platelet count; RDW, Red cell distribution width; WBC, White blood cells; ALT, Alanine aminotransferase; ALP, Alkaline phosphatase; INR(PT), International normalized ratio of prothrombin time; PT, Prothrombin time; PLR, Platelet-lymphocyte ratio; SII, Platelet\*neutrophil/lymphocyte.

**Supplementary Table S8. Analysis of whether patients re-admitted within 30 days will die within 180 days after discharge (in-hospital death excluded, n=1104).**

| Outcomes                                  | Patients re-admitted within 30 days after discharge |            |         |       |                  |
|-------------------------------------------|-----------------------------------------------------|------------|---------|-------|------------------|
|                                           | Yes (n=262)                                         | No (n=842) | P-Value | Kappa | P-Value of Kappa |
| Mortality within 180 days after discharge | 35(13.4%)                                           | 79(9.4%)   | <0.001  | 0.049 | 0.065            |

**Supplementary Table S9. Analysis of factors leading to different outcomes of patients admitted to the ICU (n=652).**

| Factors                                                                                                     | Outcomes                     |                                                           |                                                     |
|-------------------------------------------------------------------------------------------------------------|------------------------------|-----------------------------------------------------------|-----------------------------------------------------|
|                                                                                                             | Death in hospital<br>P value | Re-admission within 1<br>month after discharge<br>P value | Death within 180 days after<br>discharge<br>P value |
| Age                                                                                                         | 0.429                        | 0.419                                                     | 0.002                                               |
| Gender                                                                                                      | 0.769                        | 0.919                                                     | 0.563                                               |
| Length of stay in hospital                                                                                  | 0.288                        | 0.785                                                     | 0.008                                               |
| Length of stay in ICU                                                                                       | 0.001                        | 0.763                                                     | <0.001                                              |
| Severity of cholangitis                                                                                     | 0.001                        | 0.507                                                     | <0.001                                              |
| Surgical operations                                                                                         | 0.239                        | 0.463                                                     | 0.416                                               |
| Endoscopy                                                                                                   | 0.010                        | 0.979                                                     | 0.014                                               |
| Interventional operations                                                                                   | 0.281                        | 0.232                                                     | 0.279                                               |
| Surgical or interventional or<br>endoscopic operations                                                      | 0.010                        | 0.428                                                     | 0.013                                               |
| Endoscopy combined with<br>surgical operations                                                              | 0.126                        | 0.444                                                     | 0.182                                               |
| Endoscopy combined with<br>interventional operations                                                        | 0.847                        | 0.522                                                     | 0.705                                               |
| Endoscopy combined with<br>another operations                                                               | 0.287                        | 0.981                                                     | 0.232                                               |
| Surgical or interventional<br>operations other than endoscopy                                               | 0.357                        | 0.384                                                     | 0.408                                               |
| Endoscopic, surgical, and<br>interventional procedures were<br>performed during a single<br>hospitalization | 0.191                        | 0.347                                                     | 0.644                                               |
| Duration of intravenous<br>antibiotic use                                                                   | 0.012                        | 0.012                                                     | <0.001                                              |
| Blood culture results                                                                                       | 0.245                        | 0.369                                                     | 0.328                                               |
| Bile culture results                                                                                        | 0.132                        | 0.729                                                     | 0.205                                               |
| Hypertension                                                                                                | 0.839                        | 0.666                                                     | 0.547                                               |
| Diabetes                                                                                                    | 0.728                        | 0.945                                                     | 0.968                                               |
| Acute pancreatitis                                                                                          | 0.018                        | 0.300                                                     | 0.374                                               |
| Anion gap _ max                                                                                             | <0.001                       | 0.037                                                     | <0.001                                              |
| Anion gap _ avg                                                                                             | <0.001                       | 0.026                                                     | <0.001                                              |
| Anion gap _ min                                                                                             | 0.001                        | 0.034                                                     | 0.675                                               |
| Bicarbonate _ max                                                                                           | <0.001                       | 0.714                                                     | 0.001                                               |
| Bicarbonate _ avg                                                                                           | <0.001                       | 0.191                                                     | <0.001                                              |
| Bicarbonate _ min                                                                                           | <0.001                       | 0.556                                                     | <0.001                                              |
| Chloride _ max                                                                                              | 0.033                        | 0.032                                                     | 0.003                                               |
| Chloride _ avg                                                                                              | 0.598                        | 0.065                                                     | 0.131                                               |
| Chloride _ min                                                                                              | 0.278                        | 0.194                                                     | 0.628                                               |

|                     |        |       |        |
|---------------------|--------|-------|--------|
| Creatinine _ max    | <0.001 | 0.064 | <0.001 |
| Creatinine _ avg    | <0.001 | 0.133 | <0.001 |
| Creatinine _ min    | <0.001 | 0.394 | 0.001  |
| Glucose _ max       | <0.001 | 0.206 | <0.001 |
| Glucose _ avg       | 0.001  | 0.032 | 0.013  |
| Glucose _ min       | 0.005  | 0.089 | 0.002  |
| Potassium _ max     | <0.001 | 0.762 | <0.001 |
| Potassium _ avg     | <0.001 | 0.828 | <0.001 |
| Potassium _ min     | 0.026  | 0.610 | 0.775  |
| Sodium _ max        | 0.989  | 0.015 | 0.086  |
| Sodium _ avg        | 0.005  | 0.005 | 0.151  |
| Sodium _ min        | 0.001  | 0.100 | 0.001  |
| Urea nitrogen _ max | <0.001 | 0.126 | <0.001 |
| Urea nitrogen _ avg | <0.001 | 0.146 | <0.001 |
| Urea nitrogen _ min | <0.001 | 0.292 | <0.001 |
| Hematocrit _ max    | 0.623  | 0.262 | 0.652  |
| Hematocrit _ avg    | 0.025  | 0.541 | <0.001 |
| Hematocrit _ min    | 0.001  | 0.872 | <0.001 |
| Hemoglobin _ max    | 0.879  | 0.026 | 0.043  |
| Hemoglobin _ avg    | 0.007  | 0.093 | <0.001 |
| Hemoglobin _ min    | <0.001 | 0.521 | <0.001 |
| MCH _ max           | 0.001  | 0.600 | 0.416  |
| MCH _ avg           | 0.003  | 0.672 | 0.248  |
| MCH _ min           | 0.008  | 0.511 | 0.207  |
| MCHC _ max          | 0.431  | 0.002 | <0.001 |
| MCHC _ avg          | 0.009  | 0.004 | <0.001 |
| MCHC _ min          | <0.001 | 0.010 | <0.001 |
| MCV _ max           | <0.001 | 0.690 | 0.005  |
| MCV _ avg           | <0.001 | 0.363 | 0.125  |
| MCV _ min           | 0.012  | 0.309 | 0.678  |
| PLT _ max           | 0.002  | 0.414 | 0.656  |
| PLT _ avg           | <0.001 | 0.316 | 0.250  |
| PLT _ min           | <0.001 | 0.317 | 0.019  |
| RDW _ max           | <0.001 | 0.410 | <0.001 |
| RDW _ avg           | <0.001 | 0.238 | <0.001 |
| RDW _ min           | 0.001  | 0.150 | <0.001 |
| RBC _ max           | 0.183  | 0.056 | 0.456  |
| RBC _ avg           | 0.001  | 0.207 | 0.001  |
| RBC _ min           | <0.001 | 0.527 | <0.001 |
| WBC _ max           | <0.001 | 0.330 | <0.001 |
| WBC _ avg           | <0.001 | 0.425 | <0.001 |
| WBC _ min           | <0.001 | 0.730 | <0.001 |
| TBil _ max          | <0.001 | 0.732 | 0.010  |
| TBil _ avg          | <0.001 | 0.796 | 0.010  |



|                   |        |       |        |
|-------------------|--------|-------|--------|
| TBil _ min        | <0.001 | 0.803 | 0.002  |
| ALT _ max         | 0.567  | 0.039 | 0.001  |
| ALT _ avg         | 0.140  | 0.049 | <0.001 |
| ALT _ min         | 0.034  | 0.369 | <0.001 |
| ALP _ max         | 0.880  | 0.037 | 0.003  |
| ALP _ avg         | 0.308  | 0.055 | 0.045  |
| ALP _ min         | 0.010  | 0.036 | 0.472  |
| AST _ max         | 0.055  | 0.240 | 0.320  |
| AST _ avg         | 0.020  | 0.190 | 0.458  |
| AST _ min         | <0.001 | 0.288 | 0.826  |
| Magnesium _ max   | 0.014  | 0.223 | <0.001 |
| Magnesium _ avg   | 0.008  | 0.205 | <0.001 |
| Magnesium _ min   | 0.310  | 0.898 | 0.048  |
| Calcium _ max     | 0.977  | 0.667 | 0.901  |
| Calcium _ avg     | 0.036  | 0.592 | 0.011  |
| Calcium _ min     | <0.001 | 0.699 | <0.001 |
| Phosphate _ max   | <0.001 | 0.783 | <0.001 |
| Phosphate _ avg   | <0.001 | 0.633 | <0.001 |
| Phosphate _ min   | 0.035  | 0.111 | 0.031  |
| INR(PT) _ max     | <0.001 | 0.011 | <0.001 |
| INR(PT) _ avg     | <0.001 | 0.007 | <0.001 |
| INR(PT) _ min     | 0.010  | 0.071 | 0.094  |
| PT _ max          | <0.001 | 0.008 | <0.001 |
| PT _ avg          | <0.001 | 0.010 | 0.001  |
| PT _ min          | 0.012  | 0.398 | 0.064  |
| PTT _ max         | <0.001 | 0.135 | <0.001 |
| PTT _ avg         | <0.001 | 0.047 | <0.001 |
| PTT _ min         | <0.001 | 0.111 | 0.002  |
| Lipase _ max      | 0.186  | 0.014 | 0.508  |
| Lipase _ avg      | 0.053  | 0.055 | 0.629  |
| Lipase _ min      | 0.927  | 0.908 | 0.900  |
| Basophils _ max   | 0.496  | 0.186 | 0.157  |
| Basophils _ avg   | 0.136  | 0.044 | 0.620  |
| Basophils _ min   | <0.001 | 0.009 | 0.003  |
| Eosinophils _ max | 0.807  | 0.287 | 0.540  |
| Eosinophils _ avg | 0.186  | 0.090 | 0.302  |
| Eosinophils _ min | <0.001 | 0.012 | <0.001 |
| Lymphocytes _ max | 0.900  | 0.388 | 0.935  |
| Lymphocytes _ avg | 0.117  | 0.166 | 0.123  |
| Lymphocytes _ min | <0.001 | 0.059 | <0.001 |
| Monocytes _ max   | 0.003  | 0.224 | 0.009  |
| Monocytes _ avg   | 0.560  | 0.119 | 0.316  |
| Monocytes _ min   | 0.038  | 0.107 | 0.130  |
| Neutrophils _ max | 0.001  | 0.183 | <0.001 |

|                                                |        |        |        |
|------------------------------------------------|--------|--------|--------|
| Neutrophils _ avg                              | 0.209  | 0.491  | 0.142  |
| Neutrophils _ min                              | 0.698  | 0.786  | 0.763  |
| Albumin _ max                                  | 0.002  | 0.322  | <0.001 |
| Albumin _ avg                                  | <0.001 | 0.783  | <0.001 |
| Albumin _ min                                  | <0.001 | 0.866  | <0.001 |
| LD _ max                                       | <0.001 | 0.856  | 0.005  |
| LD _ avg                                       | <0.001 | 0.855  | 0.028  |
| LD _ min                                       | <0.001 | 0.742  | 0.122  |
| PH _ max                                       | 0.955  | 0.268  | 0.194  |
| PH _ avg                                       | 0.116  | 0.050  | 0.041  |
| PH _ min                                       | 0.003  | 0.006  | 0.020  |
| Specific gravity _ max                         | 0.445  | 0.734  | 0.372  |
| Specific gravity _ avg                         | 0.631  | 0.876  | 0.820  |
| Specific gravity _ min                         | 0.078  | 0.982  | 0.533  |
| Lactate _ max                                  | <0.001 | 0.660  | <0.001 |
| Lactate _ avg                                  | <0.001 | 0.592  | <0.001 |
| Lactate _ min                                  | 0.067  | 0.878  | 0.176  |
| Amylase _ max                                  | 0.033  | 0.145  | 0.107  |
| Amylase _ avg                                  | <0.001 | 0.235  | 0.003  |
| Amylase _ min                                  | <0.001 | 0.509  | 0.006  |
| NLR _ avg                                      | 0.099  | 0.136  | 0.222  |
| PLR _ avg                                      | 0.250  | 0.688  | 0.869  |
| MLR _ avg                                      | 0.021  | 0.766  | 0.049  |
| SII _ avg                                      | 0.336  | 0.646  | 0.774  |
| SIRI _ avg                                     | 0.032  | 0.776  | 0.057  |
| GNRI _ avg                                     | 0.023  | 0.566  | <0.001 |
| Weight                                         | 0.158  | 0.686  | 0.008  |
| Height                                         | 0.433  | 0.458  | 0.256  |
| BMI                                            | 0.305  | 0.916  | 0.015  |
| APSO score                                     | <0.001 | 0.807  | <0.001 |
| GCS score                                      | 0.802  | 0.032  | 0.023  |
| LODS score                                     | <0.001 | 0.501  | <0.001 |
| MELD score                                     | <0.001 | 0.897  | <0.001 |
| OASIS score                                    | <0.001 | 0.744  | <0.001 |
| SIRS score                                     | <0.001 | 0.647  | <0.001 |
| SOFA score                                     | <0.001 | 0.514  | <0.001 |
| Sepsis                                         | 0.035  | 0.001  | 0.135  |
| AKI stage                                      | <0.001 | 0.637  | <0.001 |
| Renal replacement therapy                      | <0.001 | 0.721  | <0.001 |
| Duration of auxiliary ventilation              | <0.001 | <0.001 | <0.001 |
| Duration of vasopressor drug use               | <0.001 | 0.085  | <0.001 |
| Urine volume on the first day of ICU admission | <0.001 | 0.932  | <0.001 |

|                                                                |        |       |        |
|----------------------------------------------------------------|--------|-------|--------|
| Duration of arterial catheterization                           | <0.001 | 0.010 | <0.001 |
| Duration of intravenous catheterization                        | <0.001 | 0.855 | <0.001 |
| Heart rate on the first day of ICU _ max                       | <0.001 | 0.510 | <0.001 |
| Heart rate on the first day of ICU _ avg                       | <0.001 | 0.313 | <0.001 |
| Heart rate on the first day of ICU _ min                       | 0.061  | 0.077 | 0.004  |
| SysBP on the first day of ICU _ max                            | 0.080  | 0.090 | 0.589  |
| SysBP on the first day of ICU _ avg                            | <0.001 | 0.386 | 0.036  |
| SysBP on the first day of ICU _ min                            | <0.001 | 0.772 | 0.002  |
| DiasBP on the first day of ICU _ max                           | 0.085  | 0.702 | 0.556  |
| DiasBP on the first day of ICU _ avg                           | 0.001  | 0.653 | 0.010  |
| DiasBP on the first day of ICU _ min                           | <0.001 | 0.062 | <0.001 |
| Mean arterial pressure on the first day of ICU admission _ max | 0.966  | 0.133 | 0.499  |
| Mean arterial pressure on the first day of ICU admission _ avg | <0.001 | 0.389 | 0.041  |
| Mean arterial pressure on the first day of ICU admission _ min | <0.001 | 0.423 | 0.001  |
| Respiratory rate on the first day of ICU _ max                 | <0.001 | 0.688 | 0.001  |
| Respiratory rate on the first day of ICU _ avg                 | <0.001 | 0.294 | <0.001 |
| Respiratory rate on the first day of ICU _ min                 | 0.851  | 0.017 | 0.648  |
| Temperature on the first day of ICU admission _ max            | 0.938  | 0.626 | 0.037  |
| Temperature on the first day of ICU admission _ avg            | 0.795  | 0.299 | 0.018  |
| Temperature on the first day of ICU admission _ min            | 0.272  | 0.051 | 0.011  |
| SpO2 on the first day of ICU _                                 | 0.656  | 0.578 | 0.073  |

|                                 |        |       |        |
|---------------------------------|--------|-------|--------|
| max                             |        |       |        |
| SpO2 on the first day of ICU _  | 0.031  | 0.326 | 0.458  |
| avg                             |        |       |        |
| SpO2 on the first day of ICU _  | <0.001 | 0.146 | <0.001 |
| min                             |        |       |        |
| Glucose on the first day of ICU | 0.041  | 0.794 | 0.006  |
| admission _ max                 |        |       |        |
| Glucose on the first day of ICU | 0.125  | 0.463 | 0.130  |
| admission _ avg                 |        |       |        |
| Glucose on the first day of ICU | 0.966  | 0.159 | 0.435  |
| admission _ min                 |        |       |        |

---

\* ICU, Intensive care unit; MCH, Mean corpuscular hemoglobin; MCHC, Mean corpuscular hemoglobin concentration; MCV, Mean corpuscular volume; PLT, Platelet count; RDW, Red cell distribution width; RBC, Red blood cells; WBC, White blood cells; TBil, Total bilirubin; ALT, Alanine aminotransferase; ALP, Alkaline phosphatase; AST, Aspartate aminotransferase; INR(PT), International normalized ratio of prothrombin time; PT, Prothrombin time; PTT, Partial thromboplastin time; LD, Lactate dehydrogenase; NLR, Neutrophil-lymphocyte ratio; PLR, Platelet-lymphocyte ratio; MLR, Monocyte-lymphocyte ratio; SII, Platelet\*neutrophil/lymphocyte; SIRI, Neutrocyte\*monocyte/lymphocyte; GNRI, Geriatric nutritional risk index; BMI, Body mass index; APSIII, Acute physiology score iii; GCS, Glasgow coma scale; LODS, Logistic organ dysfunction system; MELD, Model for end-stage liver disease; OASIS, Oxford acute severity of illness score; SIRS, Systemic inflammatory response syndrome; SOFA, Sepsis-related organ failure; AKI, Acute kidney injury; SysBP, Systolic blood pressure; DiasBP, Diastolic blood pressure.

**Supplementary Table S10. Analysis of factors leading to different outcomes of patients underwent operations during ICU treatment (n=614).**

| Factors                                                                                                     | Outcomes                     |                                                           |                                                     |
|-------------------------------------------------------------------------------------------------------------|------------------------------|-----------------------------------------------------------|-----------------------------------------------------|
|                                                                                                             | Death in hospital<br>P value | Re-admission within 1<br>month after discharge<br>P value | Death within 180 days after<br>discharge<br>P value |
| Age                                                                                                         | 0.363                        | 0.607                                                     | 0.008                                               |
| Gender                                                                                                      | 0.443                        | 0.805                                                     | 0.657                                               |
| Length of stay in hospital                                                                                  | 0.448                        | 0.631                                                     | 0.009                                               |
| Length of stay in ICU                                                                                       | <0.001                       | 0.567                                                     | <0.001                                              |
| Severity of cholangitis                                                                                     | 0.002                        | 0.217                                                     | <0.001                                              |
| Surgical operations                                                                                         | 0.417                        | 0.386                                                     | 0.670                                               |
| Endoscopy                                                                                                   | 0.263                        | 0.412                                                     | 0.321                                               |
| Interventional operations                                                                                   | 0.171                        | 0.261                                                     | 0.182                                               |
| Endoscopy combined with<br>surgical operations                                                              | 0.222                        | 0.377                                                     | 0.315                                               |
| Endoscopy combined with<br>interventional operations                                                        | 0.996                        | 0.564                                                     | 0.560                                               |
| Endoscopy combined with<br>another operations                                                               | 0.499                        | 0.914                                                     | 0.420                                               |
| Surgical or interventional<br>operations other than endoscopy                                               | 0.263                        | 0.412                                                     | 0.321                                               |
| Endoscopic, surgical, and<br>interventional procedures were<br>performed during a single<br>hospitalization | 0.213                        | 0.332                                                     | 0.559                                               |
| Interval between admission and<br>first operation (Priority given to<br>endoscopy) (days)                   | 0.624                        | 0.401                                                     | 0.209                                               |
| Duration of intravenous<br>antibiotic use                                                                   | 0.022                        | 0.007                                                     | <0.001                                              |
| Blood culture results                                                                                       | 0.170                        | 0.306                                                     | 0.170                                               |
| Bile culture results                                                                                        | 0.087                        | 0.700                                                     | 0.155                                               |
| Hypertension                                                                                                | 0.852                        | 0.620                                                     | 0.933                                               |
| Diabetes                                                                                                    | 0.684                        | 0.988                                                     | 0.688                                               |
| Acute pancreatitis                                                                                          | 0.007                        | 0.379                                                     | 0.497                                               |
| Anion gap _ max                                                                                             | <0.001                       | 0.077                                                     | <0.001                                              |
| Anion gap _ avg                                                                                             | <0.001                       | 0.030                                                     | <0.001                                              |
| Anion gap _ min                                                                                             | 0.004                        | 0.022                                                     | 0.441                                               |
| Bicarbonate _ max                                                                                           | <0.001                       | 0.975                                                     | 0.004                                               |
| Bicarbonate _ avg                                                                                           | <0.001                       | 0.794                                                     | <0.001                                              |
| Bicarbonate _ min                                                                                           | <0.001                       | 0.740                                                     | <0.001                                              |
| Chloride _ max                                                                                              | 0.021                        | 0.036                                                     | 0.004                                               |
| Chloride _ avg                                                                                              | 0.188                        | 0.066                                                     | 0.224                                               |

|                     |        |       |        |
|---------------------|--------|-------|--------|
| Chloride _ min      | 0.425  | 0.249 | 0.893  |
| Creatinine _ max    | <0.001 | 0.183 | <0.001 |
| Creatinine _ avg    | <0.001 | 0.320 | <0.001 |
| Creatinine _ min    | <0.001 | 0.713 | 0.001  |
| Glucose _ max       | <0.001 | 0.252 | <0.001 |
| Glucose _ avg       | <0.001 | 0.055 | 0.011  |
| Glucose _ min       | 0.006  | 0.126 | 0.001  |
| Potassium _ max     | <0.001 | 0.850 | <0.001 |
| Potassium _ avg     | <0.001 | 0.563 | <0.001 |
| Potassium _ min     | 0.029  | 0.622 | 0.837  |
| Sodium _ max        | 0.942  | 0.014 | 0.236  |
| Sodium _ avg        | 0.017  | 0.009 | 0.072  |
| Sodium _ min        | 0.001  | 0.074 | 0.001  |
| Urea nitrogen _ max | <0.001 | 0.298 | <0.001 |
| Urea nitrogen _ avg | <0.001 | 0.355 | <0.001 |
| Urea nitrogen _ min | <0.001 | 0.586 | <0.001 |
| Hematocrit _ max    | 0.368  | 0.211 | 0.755  |
| Hematocrit _ avg    | 0.016  | 0.627 | <0.001 |
| Hematocrit _ min    | 0.001  | 0.820 | <0.001 |
| Hemoglobin _ max    | 0.581  | 0.021 | 0.064  |
| Hemoglobin _ avg    | 0.009  | 0.118 | <0.001 |
| Hemoglobin _ min    | 0.001  | 0.435 | <0.001 |
| MCH _ max           | 0.001  | 0.474 | 0.318  |
| MCH _ avg           | 0.003  | 0.539 | 0.160  |
| MCH _ min           | 0.006  | 0.383 | 0.129  |
| MCHC _ max          | 0.713  | 0.001 | <0.001 |
| MCHC _ avg          | 0.031  | 0.001 | <0.001 |
| MCHC _ min          | <0.001 | 0.004 | <0.001 |
| MCV _ max           | <0.001 | 0.560 | 0.014  |
| MCV _ avg           | <0.001 | 0.408 | 0.198  |
| MCV _ min           | 0.026  | 0.304 | 0.874  |
| PLT _ max           | 0.008  | 0.431 | 0.576  |
| PLT _ avg           | <0.001 | 0.329 | 0.894  |
| PLT _ min           | <0.001 | 0.399 | 0.122  |
| RDW _ max           | <0.001 | 0.220 | <0.001 |
| RDW _ avg           | <0.001 | 0.116 | <0.001 |
| RDW _ min           | 0.006  | 0.090 | <0.001 |
| RBC _ max           | 0.388  | 0.037 | 0.697  |
| RBC _ avg           | <0.001 | 0.245 | 0.001  |
| RBC _ min           | <0.001 | 0.562 | <0.001 |
| WBC _ max           | <0.001 | 0.360 | <0.001 |
| WBC _ avg           | <0.001 | 0.492 | <0.001 |
| WBC _ min           | <0.001 | 0.808 | <0.001 |
| TBil _ max          | <0.001 | 0.641 | 0.016  |

|                   |        |       |        |
|-------------------|--------|-------|--------|
| TBil _ avg        | <0.001 | 0.869 | 0.024  |
| TBil _ min        | 0.001  | 0.931 | 0.008  |
| ALT _ max         | 0.778  | 0.019 | 0.002  |
| ALT _ avg         | 0.215  | 0.016 | <0.001 |
| ALT _ min         | 0.048  | 0.176 | <0.001 |
| ALP _ max         | 0.403  | 0.032 | <0.001 |
| ALP _ avg         | 0.931  | 0.062 | 0.002  |
| ALP _ min         | 0.121  | 0.045 | 0.088  |
| AST _ max         | 0.057  | 0.118 | 0.338  |
| AST _ avg         | 0.026  | 0.070 | 0.489  |
| AST _ min         | <0.001 | 0.157 | 0.954  |
| Magnesium _ max   | 0.021  | 0.181 | <0.001 |
| Magnesium _ avg   | 0.005  | 0.278 | 0.001  |
| Magnesium _ min   | 0.564  | 0.649 | 0.094  |
| Calcium _ max     | 0.940  | 0.771 | 0.675  |
| Calcium _ avg     | 0.145  | 0.640 | 0.082  |
| Calcium _ min     | <0.001 | 0.759 | <0.001 |
| Phosphate _ max   | <0.001 | 0.773 | <0.001 |
| Phosphate _ avg   | <0.001 | 0.569 | <0.001 |
| Phosphate _ min   | 0.016  | 0.106 | 0.007  |
| INR(PT) _ max     | <0.001 | 0.005 | <0.001 |
| INR(PT) _ avg     | 0.002  | 0.004 | 0.003  |
| INR(PT) _ min     | 0.123  | 0.030 | 0.268  |
| PT _ max          | <0.001 | 0.005 | <0.001 |
| PT _ avg          | 0.002  | 0.007 | 0.005  |
| PT _ min          | 0.091  | 0.292 | 0.184  |
| PTT _ max         | <0.001 | 0.049 | <0.001 |
| PTT _ avg         | <0.001 | 0.015 | <0.001 |
| PTT _ min         | <0.001 | 0.050 | 0.003  |
| Lipase _ max      | 0.113  | 0.021 | 0.494  |
| Lipase _ avg      | 0.090  | 0.083 | 0.851  |
| Lipase _ min      | 0.380  | 0.776 | 0.622  |
| Basophils _ max   | 0.784  | 0.061 | 0.407  |
| Basophils _ avg   | 0.014  | 0.010 | 0.278  |
| Basophils _ min   | <0.001 | 0.005 | 0.003  |
| Eosinophils _ max | 0.999  | 0.143 | 0.503  |
| Eosinophils _ avg | 0.170  | 0.045 | 0.398  |
| Eosinophils _ min | <0.001 | 0.011 | 0.001  |
| Lymphocytes _ max | 0.619  | 0.217 | 0.859  |
| Lymphocytes _ avg | 0.084  | 0.082 | 0.163  |
| Lymphocytes _ min | <0.001 | 0.034 | <0.001 |
| Monocytes _ max   | 0.003  | 0.167 | 0.008  |
| Monocytes _ avg   | 0.473  | 0.101 | 0.260  |
| Monocytes _ min   | 0.060  | 0.106 | 0.156  |

|                                   |        |        |        |
|-----------------------------------|--------|--------|--------|
| Neutrophils _ max                 | 0.005  | 0.181  | 0.001  |
| Neutrophils _ avg                 | 0.305  | 0.371  | 0.226  |
| Neutrophils _ min                 | 0.656  | 0.575  | 0.587  |
| Albumin _ max                     | 0.002  | 0.232  | <0.001 |
| Albumin _ avg                     | <0.001 | 0.419  | <0.001 |
| Albumin _ min                     | <0.001 | 0.672  | <0.001 |
| LD _ max                          | <0.001 | 0.971  | 0.001  |
| LD _ avg                          | <0.001 | 0.956  | 0.006  |
| LD _ min                          | <0.001 | 0.739  | 0.046  |
| PH _ max                          | 0.920  | 0.253  | 0.184  |
| PH _ avg                          | 0.109  | 0.064  | 0.047  |
| PH _ min                          | 0.007  | 0.010  | 0.053  |
| Specific gravity _ max            | 0.642  | 0.962  | 0.377  |
| Specific gravity _ avg            | 0.568  | 0.992  | 0.608  |
| Specific gravity _ min            | 0.129  | 0.977  | 0.986  |
| Lactate _ max                     | <0.001 | 0.876  | <0.001 |
| Lactate _ avg                     | <0.001 | 0.725  | 0.006  |
| Lactate _ min                     | 0.100  | 0.898  | 0.276  |
| Amylase _ max                     | 0.033  | 0.178  | 0.104  |
| Amylase _ avg                     | <0.001 | 0.382  | 0.008  |
| Amylase _ min                     | 0.001  | 0.653  | 0.052  |
| NLR _ avg                         | 0.075  | 0.092  | 0.239  |
| PLR _ avg                         | 0.668  | 0.531  | 0.373  |
| MLR _ avg                         | 0.013  | 0.985  | 0.059  |
| SII _ avg                         | 0.782  | 0.483  | 0.339  |
| SIRI _ avg                        | 0.025  | 0.990  | 0.072  |
| GNRI _ avg                        | 0.002  | 0.785  | <0.001 |
| Weight                            | 0.207  | 0.650  | 0.025  |
| Height                            | 0.338  | 0.641  | 0.813  |
| BMI                               | 0.069  | 0.730  | 0.009  |
| APSO score                        | <0.001 | 0.538  | <0.001 |
| GCS score                         | 0.228  | 0.030  | 0.009  |
| LODS score                        | <0.001 | 0.888  | <0.001 |
| MELD score                        | <0.001 | 0.821  | <0.001 |
| OASIS score                       | <0.001 | 0.980  | <0.001 |
| SIRS score                        | <0.001 | 0.488  | <0.001 |
| SOFA score                        | <0.001 | 0.679  | <0.001 |
| Sepsis                            | 0.019  | 0.001  | 0.099  |
| AKI stage                         | <0.001 | 0.623  | <0.001 |
| Renal replacement therapy         | <0.001 | 0.927  | <0.001 |
| Duration of auxiliary ventilation | <0.001 | <0.001 | <0.001 |
| Duration of vasopressor drug use  | <0.001 | 0.146  | <0.001 |
| Urine volume on the first day of  | <0.001 | 0.636  | <0.001 |



|                                                                |        |       |        |
|----------------------------------------------------------------|--------|-------|--------|
| ICU admission                                                  |        |       |        |
| Duration of arterial catheterization                           | <0.001 | 0.013 | <0.001 |
| Duration of intravenous catheterization                        | <0.001 | 0.890 | <0.001 |
| Heart rate on the first day of ICU _ max                       | <0.001 | 0.613 | <0.001 |
| Heart rate on the first day of ICU _ avg                       | 0.001  | 0.218 | <0.001 |
| Heart rate on the first day of ICU _ min                       | 0.277  | 0.101 | 0.025  |
| SysBP on the first day of ICU _ max                            | 0.150  | 0.122 | 0.263  |
| SysBP on the first day of ICU _ avg                            | <0.001 | 0.285 | 0.229  |
| SysBP on the first day of ICU _ min                            | <0.001 | 0.534 | 0.014  |
| DiasBP on the first day of ICU _ max                           | 0.040  | 0.599 | 0.750  |
| DiasBP on the first day of ICU _ avg                           | 0.002  | 0.588 | 0.013  |
| DiasBP on the first day of ICU _ min                           | <0.001 | 0.132 | 0.002  |
| Mean arterial pressure on the first day of ICU admission _ max | 0.517  | 0.175 | 0.451  |
| Mean arterial pressure on the first day of ICU admission _ avg | 0.003  | 0.288 | 0.182  |
| Mean arterial pressure on the first day of ICU admission _ min | <0.001 | 0.888 | 0.003  |
| Respiratory rate on the first day of ICU _ max                 | <0.001 | 0.392 | <0.001 |
| Respiratory rate on the first day of ICU _ avg                 | <0.001 | 0.109 | 0.001  |
| Respiratory rate on the first day of ICU _ min                 | 0.067  | 0.013 | 0.883  |
| Temperature on the first day of ICU admission _ max            | 0.459  | 0.909 | 0.156  |
| Temperature on the first day of ICU admission _ avg            | 0.362  | 0.391 | 0.145  |
| Temperature on the first day of ICU admission _ min            | 0.944  | 0.064 | 0.119  |

|                                                    |        |       |        |
|----------------------------------------------------|--------|-------|--------|
| SpO2 on the first day of ICU _<br>max              | 0.304  | 0.493 | 0.062  |
| SpO2 on the first day of ICU _<br>avg              | 0.026  | 0.554 | 0.305  |
| SpO2 on the first day of ICU _<br>min              | <0.001 | 0.325 | <0.001 |
| Glucose on the first day of ICU<br>admission _ max | 0.048  | 0.958 | 0.008  |
| Glucose on the first day of ICU<br>admission _ avg | 0.150  | 0.574 | 0.156  |
| Glucose on the first day of ICU<br>admission _ min | 0.985  | 0.242 | 0.405  |

---

\* ICU, Intensive care unit; MCH, Mean corpuscular hemoglobin; MCHC, Mean corpuscular hemoglobin concentration; MCV, Mean corpuscular volume; PLT, Platelet count; RDW, Red cell distribution width; RBC, Red blood cells; WBC, White blood cells; TBil, Total bilirubin; ALT, Alanine aminotransferase; ALP, Alkaline phosphatase; AST, Aspartate aminotransferase; INR(PT), International normalized ratio of prothrombin time; PT, Prothrombin time; PTT, Partial thromboplastin time; LD, Lactate dehydrogenase; NLR, Neutrophil-lymphocyte ratio; PLR, Platelet-lymphocyte ratio; MLR, Monocyte-lymphocyte ratio; SII, Platelet\*neutrophil/lymphocyte; SIRI, Neutrocyte\*monocyte/lymphocyte; GNRI, Geriatric nutritional risk index; BMI, Body mass index; APSIII, Acute physiology score iii; GCS, Glasgow coma scale; LODS, Logistic organ dysfunction system; MELD, Model for end-stage liver disease; OASIS, Oxford acute severity of illness score; SIRS, Systemic inflammatory response syndrome; SOFA, Sepsis-related organ failure; AKI, Acute kidney injury; SysBP, Systolic blood pressure; DiasBP, Diastolic blood pressure.

**Supplementary Table S11. Variables classified according to the type of data distribution corresponding to various patient categories.**

| All the patients. (n=142)     |                                        |                                                     | Patients admitted to the ICU. (n=185) |                                        |                                                     | Patients underwent operations during ICU treatment. (n=186) |                                                                        |                                                     |
|-------------------------------|----------------------------------------|-----------------------------------------------------|---------------------------------------|----------------------------------------|-----------------------------------------------------|-------------------------------------------------------------|------------------------------------------------------------------------|-----------------------------------------------------|
| Normal distribution variables | Abnormal distribution variables        | Categorical variables                               | Normal distribution variables         | Abnormal distribution variables        | Categorical variables                               | Normal distribution variables                               | Abnormal distribution variables                                        | Categorical variables                               |
| Hematocrit_max                | Age                                    | Gender                                              | Bicarbonate_avg                       | Age                                    | Gender                                              | Hematocrit_min                                              | Age                                                                    | Gender                                              |
| Hematocrit_min                | Length of stay in hospital             | Severity of cholangitis                             | Chloride_avg                          | Length of stay in hospital             | Severity of cholangitis                             | Hemoglobin_min                                              | Length of stay in hospital                                             | Severity of cholangitis                             |
| Hemoglobin_max                | Length of stay in ICU                  | Surgical operations                                 | Sodium_avg                            | Length of stay in ICU                  | Surgical operations                                 | RBC_min                                                     | Length of stay in ICU                                                  | Surgical operations                                 |
| Hemoglobin_min                | Duration of intravenous antibiotic use | Endoscopy                                           | Hematocrit_max                        | Duration of intravenous antibiotic use | Endoscopy                                           |                                                             | Interval between admission and operation (Priority given to endoscopy) | Endoscopy                                           |
| RBC_max                       | Anion gap_max                          | Interventional operations                           | Hematocrit_avg                        | Anion gap_max                          | Interventional operations                           |                                                             | Anion gap_max                                                          | Interventional operations                           |
| RBC_avg                       | Anion gap_avg                          | Surgical or interventional or endoscopic operations | Hematocrit_min                        | Anion gap_avg                          | Surgical or interventional or endoscopic operations |                                                             | Anion gap_avg                                                          | Surgical or interventional or endoscopic operations |
| RBC_min                       | Anion gap_min                          | Endoscopy combined with surgical operations         | Hemoglobin_max                        | Anion gap_min                          | Endoscopy combined with surgical operations         |                                                             | Anion gap_min                                                          | Endoscopy combined with surgical operations         |
| Albumin_avg                   | Bicarbonate_max                        | Endoscopy combined with interventional operations   | Hemoglobin_avg                        | Bicarbonate_max                        | Endoscopy combined with interventional operations   |                                                             | Bicarbonate_max                                                        | Endoscopy combined with interventional operations   |
|                               | Bicarbonate                            | Endoscopy                                           | Hemoglobin                            | Bicarbonate                            | Endoscopy                                           |                                                             | Bicarbonate                                                            | Endoscopy                                           |

|  |                   |                                                                                                    |                                      |                  |                                                                                                    |  |                   |                                                                                                    |
|--|-------------------|----------------------------------------------------------------------------------------------------|--------------------------------------|------------------|----------------------------------------------------------------------------------------------------|--|-------------------|----------------------------------------------------------------------------------------------------|
|  | te _ avg          | combined with another operations                                                                   | bin _ min                            | e _ min          | combined with another operations                                                                   |  | e _ avg           | combined with another operations                                                                   |
|  | Bicarbonate _ min | Surgical or interventional operations other than endoscopy                                         | MCV _ avg                            | Chloride _ max   | Surgical or interventional operations other than endoscopy                                         |  | Bicarbonate _ min | Surgical or interventional operations other than endoscopy                                         |
|  | Chloride _ max    | Endoscopic, surgical, and interventional procedures were performed during a single hospitalization | RBC _ max                            | Chloride _ min   | Endoscopic, surgical, and interventional procedures were performed during a single hospitalization |  | Chloride _ max    | Endoscopic, surgical, and interventional procedures were performed during a single hospitalization |
|  | Chloride _ avg    | Blood culture results                                                                              | RBC _ avg                            | Creatinine _ max | Blood culture results                                                                              |  | Chloride _ avg    | Blood culture results                                                                              |
|  | Chloride _ min    | Bile culture results                                                                               | RBC _ min                            | Creatinine _ avg | Bile culture results                                                                               |  | Chloride _ min    | Bile culture results                                                                               |
|  | Creatinine _ max  | Hypertension                                                                                       | Magnesium _ avg                      | Creatinine _ min | Hypertension                                                                                       |  | Creatinine _ max  | Hypertension                                                                                       |
|  | Creatinine _ avg  | Diabetes                                                                                           | Calcium _ avg                        | Glucose _ max    | Diabetes                                                                                           |  | Creatinine _ avg  | Diabetes                                                                                           |
|  | Creatinine _ min  | Acute pancreatitis                                                                                 | Albumin _ max                        | Glucose _ avg    | Acute pancreatitis                                                                                 |  | Creatinine _ min  | Acute pancreatitis                                                                                 |
|  | Glucose _ max     |                                                                                                    | Albumin _ avg                        | Glucose _ min    | Sepsis                                                                                             |  | Glucose _ max     | Sepsis                                                                                             |
|  | Glucose _ avg     |                                                                                                    | GNRI _ avg                           | Potassium _ max  | AKI stage                                                                                          |  | Glucose _ avg     | AKI stage                                                                                          |
|  | Glucose _ min     |                                                                                                    | Height                               | Potassium _ avg  | Renal replacement therapy                                                                          |  | Glucose _ min     | Renal replacement therapy                                                                          |
|  | Potassium _ max   |                                                                                                    | Heart rate on the first day of ICU _ | Potassium _ min  |                                                                                                    |  | Potassium _ max   |                                                                                                    |

|  |                           |  |                                                  |                           |  |  |                           |
|--|---------------------------|--|--------------------------------------------------|---------------------------|--|--|---------------------------|
|  |                           |  | avg                                              |                           |  |  |                           |
|  | Potassium<br>_ avg        |  | DiasBP<br>on the<br>first day<br>of ICU _<br>avg | Sodium _<br>max           |  |  | Potassium<br>_ avg        |
|  | Potassium<br>_ min        |  | DiasBP<br>on the<br>first day<br>of ICU _<br>min | Sodium _<br>min           |  |  | Potassium<br>_ min        |
|  | Sodium _<br>max           |  |                                                  | Urea<br>nitrogen _<br>max |  |  | Sodium _<br>max           |
|  | Sodium _<br>avg           |  |                                                  | Urea<br>nitrogen _<br>avg |  |  | Sodium _<br>avg           |
|  | Sodium _<br>min           |  |                                                  | Urea<br>nitrogen _<br>min |  |  | Sodium _<br>min           |
|  | Urea<br>nitrogen _<br>max |  |                                                  | MCH _<br>max              |  |  | Urea<br>nitrogen _<br>max |
|  | Urea<br>nitrogen _<br>avg |  |                                                  | MCH _ avg                 |  |  | Urea<br>nitrogen _<br>avg |
|  | Urea<br>nitrogen _<br>min |  |                                                  | MCH _<br>min              |  |  | Urea<br>nitrogen _<br>min |
|  | Hematocri<br>t _ avg      |  |                                                  | MCHC _<br>max             |  |  | Hematocrit<br>_ max       |
|  | Hemoglob<br>in _ avg      |  |                                                  | MCHC _<br>avg             |  |  | Hematocrit<br>_ avg       |
|  | MCH _<br>max              |  |                                                  | MCHC _<br>min             |  |  | Hemoglobi<br>n _ max      |
|  | MCH _<br>avg              |  |                                                  | MCV _<br>max              |  |  | Hemoglobi<br>n _ avg      |
|  | MCH _<br>min              |  |                                                  | MCV _<br>min              |  |  | MCH _<br>max              |
|  | MCHC _<br>max             |  |                                                  | PLT _ max                 |  |  | MCH _ avg                 |
|  | MCHC _<br>avg             |  |                                                  | PLT _ avg                 |  |  | MCH _<br>min              |
|  | MCHC _                    |  |                                                  | PLT _ min                 |  |  | MCHC _                    |

|  |               |  |  |                    |  |  |               |  |
|--|---------------|--|--|--------------------|--|--|---------------|--|
|  | min           |  |  |                    |  |  | max           |  |
|  | MCV _<br>max  |  |  | RDW _<br>max       |  |  | MCHC _<br>avg |  |
|  | MCV _<br>avg  |  |  | RDW _ avg          |  |  | MCHC _<br>min |  |
|  | MCV _<br>min  |  |  | RDW _<br>min       |  |  | MCV _<br>max  |  |
|  | PLT _<br>max  |  |  | WBC _<br>max       |  |  | MCV _ avg     |  |
|  | PLT _ avg     |  |  | WBC _ avg          |  |  | MCV _<br>min  |  |
|  | PLT _ min     |  |  | WBC _<br>min       |  |  | PLT _ max     |  |
|  | RDW _<br>max  |  |  | TBil _ max         |  |  | PLT _ avg     |  |
|  | RDW _<br>avg  |  |  | TBil _ avg         |  |  | PLT _ min     |  |
|  | RDW _<br>min  |  |  | TBil _ min         |  |  | RDW _<br>max  |  |
|  | WBC _<br>max  |  |  | ALT _ max          |  |  | RDW _ avg     |  |
|  | WBC _<br>avg  |  |  | ALT _ avg          |  |  | RDW _<br>min  |  |
|  | WBC _<br>min  |  |  | ALT _ min          |  |  | RBC _ max     |  |
|  | TBil _<br>max |  |  | ALP _ max          |  |  | RBC _ avg     |  |
|  | TBil _ avg    |  |  | ALP _ avg          |  |  | WBC _<br>max  |  |
|  | TBil _ min    |  |  | ALP _ min          |  |  | WBC _ avg     |  |
|  | ALT<br>_max   |  |  | AST _ max          |  |  | WBC _<br>min  |  |
|  | ALT _ avg     |  |  | AST _ avg          |  |  | TBil _ max    |  |
|  | ALT _<br>min  |  |  | AST _ min          |  |  | TBil _ avg    |  |
|  | ALP _<br>max  |  |  | Magnesi<br>m _ max |  |  | TBil _ min    |  |
|  | ALP _ avg     |  |  | Magnesi<br>m _ min |  |  | ALT _ max     |  |
|  | ALP _ min     |  |  | Calcium _<br>max   |  |  | ALT _ avg     |  |
|  | AST _ max     |  |  | Calcium _<br>min   |  |  | ALT _ min     |  |

|  |                    |  |  |                     |  |  |                    |  |
|--|--------------------|--|--|---------------------|--|--|--------------------|--|
|  | AST_avg            |  |  | Phosphate<br>_ max  |  |  | ALP_max            |  |
|  | AST_min            |  |  | Phosphate<br>_ avg  |  |  | ALP_avg            |  |
|  | Magnesium<br>m_max |  |  | Phosphate<br>_ min  |  |  | ALP_min            |  |
|  | Magnesium<br>m_avg |  |  | INR(PT) _<br>max    |  |  | AST_max            |  |
|  | Magnesium<br>m_min |  |  | INR(PT) _<br>avg    |  |  | AST_avg            |  |
|  | Calcium _<br>max   |  |  | INR(PT) _<br>min    |  |  | AST_min            |  |
|  | Calcium _<br>avg   |  |  | PT_max              |  |  | Magnesium<br>m_max |  |
|  | Calcium _<br>min   |  |  | PT_avg              |  |  | Magnesium<br>m_avg |  |
|  | Phosphate<br>_ max |  |  | PT_min              |  |  | Magnesium<br>m_min |  |
|  | Phosphate<br>_ avg |  |  | PTT_max             |  |  | Calcium _<br>max   |  |
|  | Phosphate<br>_ min |  |  | PTT_avg             |  |  | Calcium _<br>avg   |  |
|  | INR(PT) _<br>max   |  |  | PTT_min             |  |  | Calcium _<br>min   |  |
|  | INR(PT) _<br>avg   |  |  | Lipase _<br>max     |  |  | Phosphate<br>_ max |  |
|  | INR(PT) _<br>min   |  |  | Lipase _<br>avg     |  |  | Phosphate<br>_ avg |  |
|  | PT_max             |  |  | Lipase _<br>min     |  |  | Phosphate<br>_ min |  |
|  | PT_avg             |  |  | Basophils _<br>max  |  |  | INR(PT) _<br>max   |  |
|  | PT_min             |  |  | Basophils _<br>avg  |  |  | INR(PT) _<br>avg   |  |
|  | PTT_max            |  |  | Basophils _<br>min  |  |  | INR(PT) _<br>min   |  |
|  | PTT_avg            |  |  | Eosinophil<br>s_max |  |  | PT_max             |  |
|  | PTT_min            |  |  | Eosinophil<br>s_avg |  |  | PT_avg             |  |
|  | Lipase _<br>max    |  |  | Eosinophil<br>s_min |  |  | PT_min             |  |
|  | Lipase _           |  |  | Lymphocyt           |  |  | PTT_max            |  |

|  |                   |  |  |                        |  |  |                   |
|--|-------------------|--|--|------------------------|--|--|-------------------|
|  | avg               |  |  | es _ max               |  |  |                   |
|  | Lipase _ min      |  |  | Lymphocytes _ avg      |  |  | PTT _ avg         |
|  | Basophils _ max   |  |  | Lymphocytes _ min      |  |  | PTT _ min         |
|  | Basophils _ avg   |  |  | Monocytes _ max        |  |  | Lipase _ max      |
|  | Basophils _ min   |  |  | Monocytes _ avg        |  |  | Lipase _ avg      |
|  | Eosinophils _ max |  |  | Monocytes _ min        |  |  | Lipase _ min      |
|  | Eosinophils _ avg |  |  | Neutrophils _ max      |  |  | Basophils _ max   |
|  | Eosinophils _ min |  |  | Neutrophils _ avg      |  |  | Basophils _ avg   |
|  | Lymphocytes _ max |  |  | Neutrophils _ min      |  |  | Basophils _ min   |
|  | Lymphocytes _ avg |  |  | Albumin _ min          |  |  | Eosinophils _ max |
|  | Lymphocytes _ min |  |  | LD _ max               |  |  | Eosinophils _ avg |
|  | Monocytes _ max   |  |  | LD _ avg               |  |  | Eosinophils _ min |
|  | Monocytes _ avg   |  |  | LD _ min               |  |  | Lymphocytes _ max |
|  | Monocytes _ min   |  |  | PH _ max               |  |  | Lymphocytes _ avg |
|  | Neutrophils _ max |  |  | PH _ avg               |  |  | Lymphocytes _ min |
|  | Neutrophils _ avg |  |  | PH _ min               |  |  | Monocytes _ max   |
|  | Neutrophils _ min |  |  | Specific gravity _ max |  |  | Monocytes _ avg   |
|  | Albumin _ max     |  |  | Specific gravity _ avg |  |  | Monocytes _ min   |
|  | Albumin _ min     |  |  | Specific gravity _ min |  |  | Neutrophils _ max |
|  | LD _ max          |  |  | Lactate _ max          |  |  | Neutrophils _ avg |
|  | LD _ avg          |  |  | Lactate _              |  |  | Neutrophils       |



|  |                      |  |  |              |  |  |                      |  |
|--|----------------------|--|--|--------------|--|--|----------------------|--|
|  |                      |  |  | avg          |  |  | s_min                |  |
|  | LD_min               |  |  | Lactate_min  |  |  | Albumin_max          |  |
|  | PH_max               |  |  | Amylase_max  |  |  | Albumin_avg          |  |
|  | PH_avg               |  |  | Amylase_avg  |  |  | Albumin_min          |  |
|  | PH_min               |  |  | Amylase_min  |  |  | LD_max               |  |
|  | Specific gravity_max |  |  | NLR_avg      |  |  | LD_avg               |  |
|  | Specific gravity_avg |  |  | PLR_avg      |  |  | LD_min               |  |
|  | Specific gravity_min |  |  | MLR_avg      |  |  | PH_max               |  |
|  | Lactate_max          |  |  | SII_avg      |  |  | PH_avg               |  |
|  | Lactate_avg          |  |  | SIRI_avg     |  |  | PH_min               |  |
|  | Lactate_min          |  |  | Weight       |  |  | Specific gravity_max |  |
|  | Amylase_max          |  |  | BMI          |  |  | Specific gravity_avg |  |
|  | Amylase_avg          |  |  | APSIII score |  |  | Specific gravity_min |  |
|  | Amylase_min          |  |  | GCS score    |  |  | Lactate_max          |  |
|  | NLR_avg              |  |  | LODS score   |  |  | Lactate_avg          |  |
|  | PLR_avg              |  |  | MELD score   |  |  | Lactate_min          |  |
|  | MLR_avg              |  |  | OASIS score  |  |  | Amylase_max          |  |
|  | SII_avg              |  |  | SIRS score   |  |  | Amylase_avg          |  |
|  | SIRI_avg             |  |  | SOFA score   |  |  | Amylase_min          |  |

|  |  |  |  |                                                |  |  |              |  |
|--|--|--|--|------------------------------------------------|--|--|--------------|--|
|  |  |  |  | Duration of auxiliary ventilation              |  |  | NLR _ avg    |  |
|  |  |  |  | Duration of vasopressor drug use               |  |  | PLR _ avg    |  |
|  |  |  |  | Urine volume on the first day of ICU admission |  |  | MLR _ avg    |  |
|  |  |  |  | Duration of arterial catheterization           |  |  | SII _ avg    |  |
|  |  |  |  | Duration of intravenous catheterization        |  |  | SIRI _ avg   |  |
|  |  |  |  | Heart rate on the first day of ICU _ max       |  |  | GNRI _ avg   |  |
|  |  |  |  | Heart rate on the first day of ICU _ min       |  |  | Weight       |  |
|  |  |  |  | SysBP on the first day of ICU _ max            |  |  | Height       |  |
|  |  |  |  | SysBP on the first day of ICU _ avg            |  |  | BMI          |  |
|  |  |  |  | SysBP on the first day of ICU _ min            |  |  | APSIII score |  |
|  |  |  |  | DiasBP on the first day of ICU _ max           |  |  | GCS score    |  |
|  |  |  |  | OMean                                          |  |  | LODS         |  |

|  |  |  |  |                                                                |  |  |                                                |  |
|--|--|--|--|----------------------------------------------------------------|--|--|------------------------------------------------|--|
|  |  |  |  | arterial pressure on the first day of ICU admission _ max      |  |  | score                                          |  |
|  |  |  |  | Mean arterial pressure on the first day of ICU admission _ avg |  |  | MELD score                                     |  |
|  |  |  |  | Mean arterial pressure on the first day of ICU admission _ min |  |  | OASIS score                                    |  |
|  |  |  |  | Respiratory rate on the first day of ICU _ max                 |  |  | SIRS score                                     |  |
|  |  |  |  | Respiratory rate on the first day of ICU _ avg                 |  |  | SOFA score                                     |  |
|  |  |  |  | Respiratory rate on the first day of ICU _ min                 |  |  | Duration of auxiliary ventilation              |  |
|  |  |  |  | Temperature on the first day of ICU admission _ max            |  |  | Duration of vasopressor drug use               |  |
|  |  |  |  | Temperature on the first day of ICU admission _ avg            |  |  | Urine volume on the first day of ICU admission |  |

|  |  |  |  |                                                     |  |  |                                          |  |
|--|--|--|--|-----------------------------------------------------|--|--|------------------------------------------|--|
|  |  |  |  | Temperature on the first day of ICU admission _ min |  |  | Duration of arterial catheterization     |  |
|  |  |  |  | SpO2 on the first day of ICU _ max                  |  |  | Duration of intravenous catheterization  |  |
|  |  |  |  | SpO2 on the first day of ICU _ avg                  |  |  | Heart rate on the first day of ICU _ max |  |
|  |  |  |  | SpO2 on the first day of ICU _ min                  |  |  | Heart rate on the first day of ICU _ avg |  |
|  |  |  |  | Glucose on the first day of ICU admission _ max     |  |  | Heart rate on the first day of ICU _ min |  |
|  |  |  |  | Glucose on the first day of ICU admission _ avg     |  |  | SysBP on the first day of ICU _ max      |  |
|  |  |  |  | Glucose on the first day of ICU admission _ min     |  |  | SysBP on the first day of ICU _ avg      |  |
|  |  |  |  |                                                     |  |  | SysBP on the first day of ICU _ min      |  |
|  |  |  |  |                                                     |  |  | DiasBP on the first day of ICU _ max     |  |
|  |  |  |  |                                                     |  |  | DiasBP on the first day of ICU _         |  |

|  |  |  |  |  |  |  |                                                                |  |
|--|--|--|--|--|--|--|----------------------------------------------------------------|--|
|  |  |  |  |  |  |  | avg                                                            |  |
|  |  |  |  |  |  |  | DiasBP on the first day of ICU _ min                           |  |
|  |  |  |  |  |  |  | Mean arterial pressure on the first day of ICU admission _ max |  |
|  |  |  |  |  |  |  | Mean arterial pressure on the first day of ICU admission _ avg |  |
|  |  |  |  |  |  |  | Mean arterial pressure on the first day of ICU admission _ min |  |
|  |  |  |  |  |  |  | Respiratory rate on the first day of ICU _ max                 |  |
|  |  |  |  |  |  |  | Respiratory rate on the first day of ICU _ avg                 |  |
|  |  |  |  |  |  |  | Respiratory rate on the first day of ICU _ min                 |  |
|  |  |  |  |  |  |  | Temperature on the first day of ICU admission _ max            |  |

|  |  |  |  |  |  |  |                                                     |  |
|--|--|--|--|--|--|--|-----------------------------------------------------|--|
|  |  |  |  |  |  |  | Temperature on the first day of ICU admission _ avg |  |
|  |  |  |  |  |  |  | Temperature on the first day of ICU admission _ min |  |
|  |  |  |  |  |  |  | SpO2 on the first day of ICU _ max                  |  |
|  |  |  |  |  |  |  | SpO2 on the first day of ICU _ avg                  |  |
|  |  |  |  |  |  |  | SpO2 on the first day of ICU _ min                  |  |
|  |  |  |  |  |  |  | Glucose on the first day of ICU admission _ max     |  |
|  |  |  |  |  |  |  | Glucose on the first day of ICU admission _ avg     |  |
|  |  |  |  |  |  |  | Glucose on the first day of ICU admission _ min     |  |

\* SD, standard deviation; IQR, inter-quartile range; ICU, intensive care unit; MCH, mean corpuscular hemoglobin; MCHC, mean corpuscular hemoglobin concentration; MCV, mean corpuscular volume; PLT, platelet count; RDW, red blood cell distribution width; RBC, red blood cells; WBC, white blood cells; TBil, total bilirubin; ALT, alanine aminotransferase; ALP, alkaline phosphatase; AST, aspartate aminotransferase; INR(PT), international normalized ratio of

prothrombin time; PT, prothrombin time; PTT, partial thromboplastin time; LD, lactate dehydrogenase; NLR, neutrophil-lymphocyte ratio; PLR, platelet-lymphocyte ratio; MLR, monocyte-lymphocyte ratio; SII, platelet\*neutrophil/lymphocyte; SIRI, neutrocyte\*monocyte/lymphocyte; GNRI, geriatric nutritional risk index; BMI, body mass index; APsIII, acute physiology score iii; GCS, glasgow coma scale; LODS, logistic organ dysfunction system; MELD, model for end-stage liver disease; OASIS, oxford acute severity of illness score; SIRS, systemic inflammatory response syndrome; SOFA, sepsis-related organ failure; AKI, acute kidney injury; SysBP, systolic blood pressure; DiasBP, diastolic blood pressure.

**Supplementary Table S12. Influencing factors of different outcomes corresponding to various patient categories (P < 0.1).**

| All the patients. (n=1156)                  |                                                     |                                                     | Patients admitted to the ICU. (n=652)       |                                                     |                                                     | Patients underwent operations during ICU treatment. (n=614) |                                        |                                           |
|---------------------------------------------|-----------------------------------------------------|-----------------------------------------------------|---------------------------------------------|-----------------------------------------------------|-----------------------------------------------------|-------------------------------------------------------------|----------------------------------------|-------------------------------------------|
| Re-admission within 1 month after discharge | In-hospital mortality                               | Mortality within 180 days after discharge           | Re-admission within 1 month after discharge | In-hospital mortality                               | Mortality within 180 days after discharge           | Re-admission within 1 month after discharge                 | In-hospital mortality                  | Mortality within 180 days after discharge |
| Age                                         | Length of stay in hospital                          | Age                                                 | Duration of intravenous antibiotic use      | Length of stay in ICU                               | Age                                                 | Duration of intravenous antibiotic use                      | Length of stay in ICU                  | Age                                       |
| Length of stay in ICU                       | Length of stay in ICU                               | Length of stay in ICU                               | Anion gap _ max                             | Severity of cholangitis                             | Length of stay in hospital                          | Anion gap _ max                                             | Severity of cholangitis                | Length of stay in hospital                |
| Interventional operations                   | Severity of cholangitis                             | Severity of cholangitis                             | Anion gap _ avg                             | Endoscopy                                           | Length of stay in ICU                               | Anion gap _ avg                                             | Duration of intravenous antibiotic use | Length of stay in ICU                     |
| Duration of intravenous antibiotic use      | Surgical or interventional or endoscopic operations | Surgical or interventional or endoscopic operations | Anion gap _ min                             | Surgical or interventional or endoscopic operations | Severity of cholangitis                             | Anion gap _ min                                             | Bile culture results                   | Severity of cholangitis                   |
| Acute pancreatitis                          | Duration of intravenous antibiotic use              | Interventional operations                           | Chloride _ max                              | Duration of intravenous antibiotic use              | Endoscopy                                           | Chloride _ max                                              | Acute pancreatitis                     | Duration of intravenous antibiotic use    |
| Anion gap _ max                             | Blood culture results                               | Surgical or interventional or endoscopic operations | Chloride _ avg                              | Acute pancreatitis                                  | Surgical or interventional or endoscopic operations | Chloride _ avg                                              | Anion gap _ max                        | Anion gap _ max                           |
| Chloride _ max                              | Bile culture results                                | Endoscopy combined with interventional operations   | Creatinine _ max                            | Anion gap _ max                                     | Duration of intravenous antibiotic use              | Glucose _ avg                                               | Anion gap _ avg                        | Anion gap _ avg                           |
| Chloride _ avg                              | Acute pancreatitis                                  | Duration of intravenous antibiotic use              | Glucose _ avg                               | Anion gap _ avg                                     | Anion gap _ max                                     | Sodium _ max                                                | Anion gap _ min                        | Bicarbonate _ max                         |
| Creatinine _ max                            | Anion gap _ max                                     | Blood culture results                               | Glucose _ min                               | Anion gap _ min                                     | Anion gap _ avg                                     | Sodium _ avg                                                | Bicarbonate _ max                      | Bicarbonate _ avg                         |
| Creatinine _ avg                            | Anion gap _ avg                                     | Anion gap _ max                                     | Sodium _ max                                | Bicarbonate _ max                                   | Bicarbonate _ max                                   | Sodium _ min                                                | Bicarbonate _ avg                      | Bicarbonate _ min                         |
| Creatinine _ min                            | Anion gap _ min                                     | Anion gap _ avg                                     | Sodium _ avg                                | Bicarbonate _ avg                                   | Bicarbonate _ avg                                   | Hemoglobin _ max                                            | Bicarbonate _ min                      | Chloride _ max                            |
| Sodium _ max                                | Bicarbonate _ max                                   | Anion gap _ min                                     | Hemoglobin _ max                            | Bicarbonate _ min                                   | Bicarbonate _ min                                   | MCHC _ max                                                  | Chloride _ max                         | Creatinine _ max                          |



|                     |                     |                     |                   |                     |                     |                 |                     |                     |
|---------------------|---------------------|---------------------|-------------------|---------------------|---------------------|-----------------|---------------------|---------------------|
| Sodium _ avg        | Bicarbonate _ avg   | Bicarbonate _ max   | Hemoglobin _ avg  | Chloride _ max      | Chloride _ max      | MCHC _ avg      | Creatinine _ max    | Creatinine _ avg    |
| Sodium _ min        | Bicarbonate _ min   | Bicarbonate _ avg   | MCHC _ max        | Creatinine _ max    | Creatinine _ max    | MCHC _ min      | Creatinine _ avg    | Creatinine _ min    |
| Urea nitrogen _ max | Chloride _ max      | Bicarbonate _ min   | MCHC _ avg        | Creatinine _ avg    | Creatinine _ avg    | RDW _ min       | Creatinine _ min    | Glucose _ max       |
| Urea nitrogen _ avg | Chloride _ avg      | Chloride _ max      | MCHC _ min        | Creatinine _ min    | Creatinine _ min    | RBC _ max       | Glucose _ max       | Glucose _ avg       |
| MCHC _ max          | Creatinine _ max    | Chloride _ avg      | RBC _ max         | Glucose _ max       | Glucose _ max       | ALT _ max       | Glucose _ avg       | Glucose _ min       |
| MCHC _ avg          | Creatinine _ avg    | Creatinine _ max    | ALT _ max         | Glucose _ avg       | Glucose _ avg       | ALT _ avg       | Glucose _ min       | Potassium _ max     |
| RDW _ max           | Creatinine _ min    | Creatinine _ avg    | ALT _ avg         | Glucose _ min       | Glucose _ min       | ALP _ max       | Potassium _ max     | Potassium _ avg     |
| RDW _ avg           | Glucose _ max       | Creatinine _ min    | ALP _ max         | Potassium _ max     | Potassium _ max     | ALP _ avg       | Potassium _ avg     | Sodium _ avg        |
| RDW _ min           | Glucose _ avg       | Glucose _ max       | ALP _ avg         | Potassium _ avg     | Potassium _ avg     | ALP _ min       | Potassium _ min     | Sodium _ min        |
| RBC _ max           | Glucose _ min       | Glucose _ avg       | ALP _ min         | Potassium _ min     | Sodium _ max        | AST _ avg       | Sodium _ avg        | Urea nitrogen _ max |
| WBC _ max           | Potassium _ max     | Glucose _ min       | INR(PT) _ max     | Sodium _ avg        | Sodium _ min        | INR(PT) _ max   | Sodium _ min        | Urea nitrogen _ avg |
| WBC _ avg           | Potassium _ avg     | Potassium _ max     | INR(PT) _ avg     | Sodium _ min        | Urea nitrogen _ max | INR(PT) _ avg   | Urea nitrogen _ max | Urea nitrogen _ min |
| ALT _ max           | Sodium _ avg        | Potassium _ avg     | INR(PT) _ min     | Urea nitrogen _ max | Urea nitrogen _ avg | INR(PT) _ min   | Urea nitrogen _ avg | Hematocrit _ avg    |
| ALT _ avg           | Sodium _ min        | Potassium _ min     | PT _ max          | Urea nitrogen _ avg | Urea nitrogen _ min | PT _ max        | Urea nitrogen _ min | Hematocrit _ min    |
| ALT _ min           | Urea nitrogen _ max | Sodium _ max        | PT _ avg          | Urea nitrogen _ min | Hematocrit _ avg    | PT _ avg        | Hematocrit _ avg    | Hemoglobin _ max    |
| AST _ max           | Urea nitrogen _ avg | Sodium _ avg        | PTT _ avg         | Hematocrit _ avg    | Hematocrit _ min    | PTT _ max       | Hematocrit _ min    | Hemoglobin _ avg    |
| AST _ avg           | Urea nitrogen _ min | Sodium _ min        | Lipase _ max      | Hematocrit _ min    | Hemoglobin _ max    | PTT _ avg       | Hemoglobin _ avg    | Hemoglobin _ min    |
| Phosphate _ min     | Hematocrit _ avg    | Urea nitrogen _ max | Lipase _ avg      | Hemoglobin _ avg    | Hemoglobin _ avg    | PTT _ min       | Hemoglobin _ min    | MCHC _ max          |
| INR(PT) _ avg       | Hematocrit _ min    | Urea nitrogen _ avg | Basophils _ avg   | Hemoglobin _ min    | Hemoglobin _ min    | Lipase _ max    | MCH _ max           | MCHC _ avg          |
| INR(PT) _ min       | Hemoglobin _ avg    | Urea nitrogen _ min | Basophils _ min   | MCH _ max           | MCHC _ max          | Lipase _ avg    | MCH _ avg           | MCHC _ min          |
| PT _ max            | Hemoglobin _ min    | Hematocrit _ max    | Eosinophils _ avg | MCH _ avg           | MCHC _ avg          | Basophils _ max | MCH _ min           | MCV _ max           |

|                 |          |                |                                                   |          |          |                                                   |          |          |
|-----------------|----------|----------------|---------------------------------------------------|----------|----------|---------------------------------------------------|----------|----------|
| PT_avg          | MCH_max  | Hematocrit_avg | Eosinophils_min                                   | MCH_min  | MCHC_min | Basophils_avg                                     | MCHC_avg | RDW_max  |
| PTT_avg         | MCH_avg  | Hematocrit_min | Lymphocytes_min                                   | MCHC_avg | MCV_max  | Basophils_min                                     | MCHC_min | RDW_avg  |
| PTT_min         | MCH_min  | Hemoglobin_max | PH_avg                                            | MCHC_min | PLT_min  | Eosinophils_avg                                   | MCV_max  | RDW_min  |
| Lipase_max      | MCHC_avg | Hemoglobin_avg | PH_min                                            | MCV_max  | RDW_max  | Eosinophils_min                                   | MCV_avg  | RBC_avg  |
| Lipase_min      | MCHC_min | Hemoglobin_min | GCS score                                         | MCV_avg  | RDW_avg  | Lymphocytes_avg                                   | MCV_min  | RBC_min  |
| Basophils_min   | MCV_max  | MCH_min        | Sepsis                                            | MCV_min  | RDW_min  | Lymphocytes_min                                   | PLT_max  | WBC_max  |
| Eosinophils_avg | MCV_avg  | MCHC_max       | Duration of auxiliary ventilation                 | PLT_max  | RBC_avg  | PH_avg                                            | PLT_avg  | WBC_avg  |
| Eosinophils_min | MCV_min  | MCHC_avg       | Duration of vasopressor drug use                  | PLT_avg  | RBC_min  | PH_min                                            | PLT_min  | WBC_min  |
| Lymphocytes_avg | PLT_max  | MCHC_min       | Duration of arterial catheterization              | PLT_min  | WBC_max  | NLR_avg                                           | RDW_max  | TBil_max |
| Lymphocytes_min | PLT_avg  | MCV_max        | Heart rate on the first day of ICU_min            | RDW_max  | WBC_avg  | GCS score                                         | RDW_avg  | TBil_avg |
| Monocytes_max   | PLT_min  | MCV_avg        | SysBP on the first day of ICU_max                 | RDW_avg  | WBC_min  | Sepsis                                            | RDW_min  | TBil_min |
| Monocytes_avg   | RDW_max  | PLT_min        | DiasBP on the first day of ICU_min                | RDW_min  | TBil_max | Duration of auxiliary ventilation                 | RBC_avg  | ALT_max  |
| Monocytes_min   | RDW_avg  | RDW_max        | Respiratory rate on the first day of ICU_min      | RBC_avg  | TBil_avg | Duration of arterial catheterization              | RBC_min  | ALT_avg  |
| Neutrophils_max | RDW_min  | RDW_avg        | Temperature on the first day of ICU admission_min | RBC_min  | TBil_min | Respiratory rate on the first day of ICU_min      | WBC_max  | ALT_min  |
| PH_avg          | RBC_avg  | RDW_min        |                                                   | WBC_max  | ALT_max  | Temperature on the first day of ICU admission_min | WBC_avg  | ALP_max  |

|         |               |               |  |               |                 |  |               |                 |
|---------|---------------|---------------|--|---------------|-----------------|--|---------------|-----------------|
| PH_min  | RBC_min       | RBC_max       |  | WBC_avg       | ALT_avg         |  | WBC_min       | ALP_avg         |
| NLR_avg | WBC_max       | RBC_avg       |  | WBC_min       | ALT_min         |  | TBil_max      | ALP_min         |
|         | WBC_avg       | RBC_min       |  | TBil_max      | ALP_max         |  | TBil_avg      | Magnesium_max   |
|         | WBC_min       | WBC_max       |  | TBil_avg      | ALP_avg         |  | TBil_min      | Magnesium_avg   |
|         | TBil_max      | WBC_avg       |  | TBil_min      | Magnesium_max   |  | ALT_min       | Magnesium_min   |
|         | TBil_avg      | WBC_min       |  | ALT_min       | Magnesium_avg   |  | AST_max       | Calcium_avg     |
|         | TBil_min      | TBil_max      |  | ALP_min       | Magnesium_min   |  | AST_avg       | Calcium_min     |
|         | ALT_min       | TBil_avg      |  | AST_max       | Calcium_avg     |  | AST_min       | Phosphate_max   |
|         | ALP_min       | TBil_min      |  | AST_avg       | Calcium_min     |  | Magnesium_max | Phosphate_avg   |
|         | AST_max       | ALT_max       |  | AST_min       | Phosphate_max   |  | Magnesium_avg | Phosphate_min   |
|         | AST_avg       | ALT_avg       |  | Magnesium_max | Phosphate_avg   |  | Calcium_min   | INR(PT)_max     |
|         | AST_min       | ALT_min       |  | Magnesium_avg | Phosphate_min   |  | Phosphate_max | INR(PT)_avg     |
|         | Magnesium_max | ALP_max       |  | Calcium_avg   | INR(PT)_max     |  | Phosphate_avg | PT_max          |
|         | Magnesium_avg | ALP_avg       |  | Calcium_min   | INR(PT)_avg     |  | Phosphate_min | PT_avg          |
|         | Calcium_avg   | AST_min       |  | Phosphate_max | INR(PT)_min     |  | INR(PT)_max   | PTT_max         |
|         | Calcium_min   | Magnesium_max |  | Phosphate_avg | PT_max          |  | INR(PT)_avg   | PTT_avg         |
|         | Phosphate_max | Magnesium_avg |  | Phosphate_min | PT_avg          |  | PT_max        | PTT_min         |
|         | Phosphate_avg | Calcium_avg   |  | INR(PT)_max   | PT_min          |  | PT_avg        | Basophils_min   |
|         | INR(PT)_max   | Calcium_min   |  | INR(PT)_avg   | PTT_max         |  | PT_min        | Eosinophils_min |
|         | INR(PT)_avg   | Phosphate_max |  | INR(PT)_min   | PTT_avg         |  | PTT_max       | Lymphocytes_min |
|         | INR(PT)_min   | Phosphate_avg |  | PT_max        | PTT_min         |  | PTT_avg       | Monocytes_max   |
|         | PT_max        | INR(PT)_max   |  | PT_avg        | Basophils_min   |  | PTT_min       | Neutrophils_max |
|         | PT_avg        | INR(PT)_avg   |  | PT_min        | Eosinophils_min |  | Lipase_avg    | Albumin_max     |

|  |                 |                 |  |                      |                 |  |                 |              |
|--|-----------------|-----------------|--|----------------------|-----------------|--|-----------------|--------------|
|  | PT_min          | INR(PT)_min     |  | PTT_max              | Lymphocytes_min |  | Basophils_avg   | Albumin_avg  |
|  | PTT_max         | PT_max          |  | PTT_avg              | Monocytes_max   |  | Basophils_min   | Albumin_min  |
|  | PTT_avg         | PT_avg          |  | PTT_min              | Neutrophils_max |  | Eosinophils_min | LD_max       |
|  | PTT_min         | PT_min          |  | Lipase_avg           | Albumin_max     |  | Lymphocytes_avg | LD_avg       |
|  | Lipase_avg      | PTT_max         |  | Basophils_min        | Albumin_avg     |  | Lymphocytes_min | LD_min       |
|  | Basophils_avg   | PTT_avg         |  | Eosinophils_min      | Albumin_min     |  | Monocytes_max   | PH_avg       |
|  | Basophils_min   | Basophils_avg   |  | Lymphocytes_min      | LD_max          |  | Monocytes_min   | PH_min       |
|  | Eosinophils_avg | Basophils_min   |  | Monocytes_max        | LD_avg          |  | Neutrophils_max | Lactate_max  |
|  | Eosinophils_min | Eosinophils_avg |  | Monocytes_min        | PH_avg          |  | Albumin_max     | Lactate_avg  |
|  | Lymphocytes_avg | Eosinophils_min |  | Neutrophils_max      | PH_min          |  | Albumin_avg     | Amylase_avg  |
|  | Lymphocytes_min | Lymphocytes_max |  | Albumin_max          | Lactate_max     |  | Albumin_min     | Amylase_min  |
|  | Monocytes_max   | Lymphocytes_avg |  | Albumin_avg          | Lactate_avg     |  | LD_max          | MLR_avg      |
|  | Monocytes_min   | Lymphocytes_min |  | Albumin_min          | Amylase_avg     |  | LD_avg          | SIRI_avg     |
|  | Neutrophils_max | Monocytes_max   |  | LD_max               | Amylase_min     |  | LD_min          | GNRI_avg     |
|  | Neutrophils_avg | Monocytes_min   |  | LD_avg               | MLR_avg         |  | PH_min          | Weight       |
|  | Albumin_max     | Neutrophils_max |  | LD_min               | SIRI_avg        |  | Lactate_max     | BMI          |
|  | Albumin_avg     | Neutrophils_avg |  | PH_min               | GNRI_avg        |  | Lactate_avg     | APSIII score |
|  | Albumin_min     | Albumin_max     |  | Specific gravity_min | Weight          |  | Amylase_max     | GCS score    |
|  | LD_max          | Albumin_avg     |  | Lactate_max          | BMI             |  | Amylase_avg     | LODS score   |
|  | LD_avg          | Albumin_min     |  | Lactate_avg          | APSIII score    |  | Amylase_min     | MELD score   |
|  | LD_min          | LD_max          |  | Lactate_min          | GCS score       |  | NLR_avg         | OASIS score  |
|  | PH_avg          | LD_avg          |  | Amylase_max          | LODS score      |  | MLR_avg         | SIRS score   |

|  |                      |                      |  |                           |                                                |  |                                                |                                                |
|--|----------------------|----------------------|--|---------------------------|------------------------------------------------|--|------------------------------------------------|------------------------------------------------|
|  | PH_min               | PH_avg               |  | Amylase_avg               | MELD score                                     |  | SIRI_avg                                       | SOFA score                                     |
|  | Specific gravity_min | PH_min               |  | Amylase_min               | OASIS score                                    |  | GNRI_avg                                       | Sepsis                                         |
|  | Lactate_max          | Specific gravity_min |  | NLR_avg                   | SIRS score                                     |  | BMI                                            | AKI stage                                      |
|  | Lactate_avg          | Lactate_max          |  | MLR_avg                   | SOFA score                                     |  | APSIII score                                   | Renal replacement therapy                      |
|  | Amylase_max          | Lactate_avg          |  | SIRI_avg                  | AKI stage                                      |  | LODS score                                     | Duration of auxiliary ventilation              |
|  | Amylase_avg          | Amylase_avg          |  | GNRI_avg                  | Renal replacement therapy                      |  | MELD score                                     | Duration of vasopressor drug use               |
|  | Amylase_min          | Amylase_min          |  | APSIII score              | Duration of auxiliary ventilation              |  | OASIS score                                    | Urine volume on the first day of ICU admission |
|  | NLR_avg              | NLR_avg              |  | LODS score                | Duration of vasopressor drug use               |  | SIRS score                                     | Duration of arterial catheterization           |
|  | MLR_avg              | PLR_avg              |  | MELD score                | Urine volume on the first day of ICU admission |  | SOFA score                                     | Duration of intravenous catheterization        |
|  | SIRI_avg             | MLR_avg              |  | OASIS score               | Duration of arterial catheterization           |  | Sepsis                                         | Heart rate on the first day of ICU_max         |
|  |                      | SII_avg              |  | SIRS score                | Duration of intravenous catheterization        |  | AKI stage                                      | Heart rate on the first day of ICU_avg         |
|  |                      | SIRI_avg             |  | SOFA score                | Heart rate on the first day of ICU_max         |  | Renal replacement therapy                      | Heart rate on the first day of ICU_min         |
|  |                      |                      |  | Sepsis                    | Heart rate on the first day of ICU_avg         |  | Duration of auxiliary ventilation              | SysBP on the first day of ICU_min              |
|  |                      |                      |  | AKI stage                 | Heart rate on the first day of ICU_min         |  | Duration of vasopressor drug use               | DiasBP on the first day of ICU_avg             |
|  |                      |                      |  | Renal replacement therapy | SysBP on the first day of ICU_avg              |  | Urine volume on the first day of ICU admission | DiasBP on the first day of ICU_min             |

|  |  |  |  |                                                |                                                                     |  |                                         |                                                              |
|--|--|--|--|------------------------------------------------|---------------------------------------------------------------------|--|-----------------------------------------|--------------------------------------------------------------|
|  |  |  |  | Duration of auxiliary ventilation              | SysBP on the first day of ICU_min                                   |  | Duration of arterial catheterization    | Mean arterial pressure on the first day of ICU admission_min |
|  |  |  |  | Duration of vasopressor drug use               | DiasBP on the first day of ICU_avg                                  |  | Duration of intravenous catheterization | Respiratory rate on the first day of ICU_max                 |
|  |  |  |  | Urine volume on the first day of ICU admission | DiasBP on the first day of ICU_min                                  |  | Heart rate on the first day of ICU_max  | Respiratory rate on the first day of ICU_avg                 |
|  |  |  |  | Duration of arterial catheterization           | Mean arterial pressure on the first day of ICU admission_avg        |  | Heart rate on the first day of ICU_avg  | SpO2 on the first day of ICU_max                             |
|  |  |  |  | Duration of intravenous catheterization        | Mean arterial pressure on the first day of ICU admission_min (mmHg) |  | SysBP on the first day of ICU_avg       | SpO2 on the first day of ICU_min                             |
|  |  |  |  | Heart rate on the first day of ICU_max         | Respiratory rate on the first day of ICU_max                        |  | SysBP on the first day of ICU_min       | Glucose on the first day of ICU admission_max                |
|  |  |  |  | Heart rate on the first day of ICU_avg         | Respiratory rate on the first day of ICU_avg                        |  | DiasBP on the first day of ICU_max      |                                                              |
|  |  |  |  | Heart rate on the first day of ICU_min         | Temperature on the first day of ICU admission_max                   |  | DiasBP on the first day of ICU_avg      |                                                              |
|  |  |  |  | SysBP on the first day of ICU_max              | Temperature on the first day of ICU admission_avg                   |  | DiasBP on the first day of ICU_min      |                                                              |

|  |  |  |  |                                                                       |                                                     |  |                                                                |  |
|--|--|--|--|-----------------------------------------------------------------------|-----------------------------------------------------|--|----------------------------------------------------------------|--|
|  |  |  |  | SysBP on the first day of ICU _ avg                                   | Temperature on the first day of ICU admission _ min |  | Mean arterial pressure on the first day of ICU admission _ avg |  |
|  |  |  |  | SysBP on the first day of ICU _ min                                   | SpO2 on the first day of ICU _ max                  |  | Mean arterial pressure on the first day of ICU admission _ min |  |
|  |  |  |  | DiasBP on the first day of ICU _ max                                  | SpO2 on the first day of ICU _ min                  |  | Respiratory rate on the first day of ICU _ max                 |  |
|  |  |  |  | DiasBP on the first day of ICU _ avg                                  | Glucose on the first day of ICU admission _ max     |  | Respiratory rate on the first day of ICU _ avg                 |  |
|  |  |  |  | DiasBP on the first day of ICU _ min                                  |                                                     |  | Respiratory rate on the first day of ICU _ min                 |  |
|  |  |  |  | Mean arterial pressure on the first day of ICU admission _ avg        |                                                     |  | SpO2 on the first day of ICU _ avg                             |  |
|  |  |  |  | Mean arterial pressure on the first day of ICU admission _ min (mmHg) |                                                     |  | SpO2 on the first day of ICU _ min                             |  |
|  |  |  |  | Respiratory rate on the first day of ICU _ max                        |                                                     |  | Glucose on the first day of ICU admission _ max                |  |

|  |  |  |  |                                                             |  |  |  |  |
|--|--|--|--|-------------------------------------------------------------|--|--|--|--|
|  |  |  |  | Respiratory<br>rate on the<br>first day of<br>ICU_avg       |  |  |  |  |
|  |  |  |  | SpO2 on the<br>first day of<br>ICU_avg                      |  |  |  |  |
|  |  |  |  | SpO2 on the<br>first day of<br>ICU_min                      |  |  |  |  |
|  |  |  |  | Glucose on the<br>first day of<br>ICU<br>admission _<br>max |  |  |  |  |
|  |  |  |  |                                                             |  |  |  |  |

\* ICU, intensive care unit; MCH, mean corpuscular hemoglobin; MCHC, mean corpuscular hemoglobin concentration; MCV, mean corpuscular volume; PLT, platelet count; RDW, red blood cell distribution width; RBC, red blood cells; WBC, white blood cells; TBil, total bilirubin; ALT, alanine aminotransferase; ALP, alkaline phosphatase; AST, aspartate aminotransferase; INR(PT), international normalized ratio of prothrombin time; PT, prothrombin time; PTT, partial thromboplastin time; LD, lactate dehydrogenase; NLR, neutrophil-lymphocyte ratio; PLR, platelet-lymphocyte ratio; MLR, monocyte-lymphocyte ratio; SII, platelet\*neutrophil/lymphocyte; SIRI, neutrocyte\*monocyte/lymphocyte; GNRI, geriatric nutritional risk index; BMI, body mass index; APSIII, acute physiology score iii; GCS, glasgow coma scale; LODS, logistic organ dysfunction system; MELD, model for end-stage liver disease; OASIS, oxford acute severity of illness score; SIRS, systemic inflammatory response syndrome; SOFA, sepsis-related organ failure; AKI, acute kidney injury; SysBP, systolic blood pressure; DiasBP, diastolic blood pressure.



**Supplementary Table S13. Summary of variables that were finally incorporated into each model after feature selection.**

| Patient categories | Outcomes                                    | Variables ultimately incorporated into the models                                                                                                                                                                                    |
|--------------------|---------------------------------------------|--------------------------------------------------------------------------------------------------------------------------------------------------------------------------------------------------------------------------------------|
| All patients       | In-hospital mortality                       | TBil_min<br>WBC_avg<br>TBil_avg<br>WBC_min<br>LD_avg<br>RDW_max<br>Phosphate_max<br>RDW_avg<br>PTT_max<br>PTT_avg<br>Length of stay in ICU<br>Urea nitrogen_avg<br>Urea nitrogen_min                                                 |
|                    | Re-admission within 30 days after discharge | Duration of intravenous antibiotic use<br>Age<br>Length of stay in ICU<br>RBC_max<br>MCHC_avg<br>Basophils_min<br>WBC_avg<br>RDW_avg<br>Chloride_avg<br>ALT_avg<br>Chloride_max<br>Sodium_avg<br>PTT_avg<br>PTT_min<br>Monocytes_max |
|                    | Mortality within 180 days after discharge   | RDW_avg<br>RDW_max<br>Urea nitrogen_min<br>Albumin_min<br>Creatinine_max<br>Urea nitrogen_max<br>Urea nitrogen_avg<br>PTT_max<br>RDW_min<br>WBC_avg<br>Length of stay in ICU<br>WBC_min<br>Phosphate_max                             |

|                              |                                             |                                                                                                                                                                                                                                                                                               |
|------------------------------|---------------------------------------------|-----------------------------------------------------------------------------------------------------------------------------------------------------------------------------------------------------------------------------------------------------------------------------------------------|
|                              |                                             | Albumin_avg<br>Chloride_avg                                                                                                                                                                                                                                                                   |
| Patients admitted to the ICU | In-hospital mortality                       | APSO score<br>SpO2 on the first day of ICU_min<br>TBil_min<br>Bicarbonate_max<br>Lactate_avg<br>Lactate_max<br>RDW_max<br>Duration of vasopressor drug use<br>Bicarbonate_min<br>LODS score<br>SOFA score<br>PTT_avg<br>WBC_min<br>Phosphate_max<br>Anion gap_avg<br>WBC_avg                  |
|                              | Re-admission within 30 days after discharge | Duration of auxiliary ventilation<br>Duration of intravenous antibiotic use<br>Temperature on the first day of ICU admission_min<br>ALP_min<br>ALP_avg<br>Basophils_avg<br>Glucose_avg<br>PH_avg<br>MCHC_avg<br>ALT_max<br>Heart rate on the first day of ICU_min<br>Chloride_max<br>MCHC_max |
|                              | Mortality within 180 days after discharge   | APSO score<br>RDW_avg<br>RDW_max<br>RDW_min<br>Albumin_min<br>SpO2 on the first day of ICU_min<br>Bicarbonate_min<br>Urea nitrogen_min<br>LODS score<br>OASIS score<br>Lactate_max<br>MCHC_avg<br>Anion gap_avg                                                                               |

|                                                          |                                             |                                                                                                                                                                                                                                                                                              |
|----------------------------------------------------------|---------------------------------------------|----------------------------------------------------------------------------------------------------------------------------------------------------------------------------------------------------------------------------------------------------------------------------------------------|
|                                                          |                                             | AKI stage<br>TBil_min                                                                                                                                                                                                                                                                        |
| Patients underwent biliary drainage during ICU treatment | In-hospital mortality                       | Bicarbonate_avg<br>SpO2 on the first day of ICU_min<br>APSOIII score<br>Lactate_max<br>SOFA score<br>Duration of vasopressor drug use<br>Bicarbonate_max<br>TBil_min<br>Bicarbonate_min<br>LODS score<br>WBC_min<br>Urea nitrogen_max<br>Phosphate_max<br>Anion gap_max<br>Urea nitrogen_min |
|                                                          | Re-admission within 30 days after discharge | Duration of auxiliary ventilation<br>Duration of intravenous antibiotic use<br>ALP_avg<br>MCHC_avg<br>Temperature on the first day of ICU admission_min<br>Lipase_avg<br>ALP_min<br>Glucose_avg<br>PH_min<br>Lipase_max<br>PTT_max<br>Chloride_avg<br>ALP_max<br>RDW_min                     |
|                                                          | Mortality within 180 days after discharge   | RDW_max<br>APSOIII score<br>RDW_avg<br>LODS score<br>AKI stage<br>RDW_min<br>OASIS score<br>Urea nitrogen_min<br>PTT_max<br>Albumin_min<br>Bicarbonate_avg<br>WBC_min<br>Urea nitrogen_max                                                                                                   |

|  |  |                                                 |
|--|--|-------------------------------------------------|
|  |  | Urea nitrogen_avg<br>Anion gap_avg<br>GCS score |
|--|--|-------------------------------------------------|

\* ICU, intensive care unit; MCH, mean corpuscular hemoglobin; MCHC, mean corpuscular hemoglobin concentration; RDW, red blood cell distribution width; WBC, white blood cells; TBil, total bilirubin; ALT, alanine aminotransferase; ALP, alkaline phosphatase; PTT, partial thromboplastin time; LD, lactate dehydrogenase; APSIII, acute physiology score iii; GCS, glasgow coma scale; LODS, logistic organ dysfunction system; OASIS, oxford acute severity of illness score; SOFA, sepsis-related organ failure; AKI, acute kidney injury.

**Supplementary Table S14. Performance of machine learning algorithms (Predicting in-hospital mortality for all the patients included).**

| Model        | AUC   | Cutoff | Accuracy | Sensitivity | Specificity | PPV   | NPV   | F1 score | Kappa |
|--------------|-------|--------|----------|-------------|-------------|-------|-------|----------|-------|
| Logistic     | 0.840 | 0.049  | 0.831    | 0.82        | 0.777       | 0.177 | 0.984 | 0.291    | 0.226 |
| XGBoost      | 0.967 | 0.284  | 0.968    | 0.964       | 0.899       | 0.665 | 0.983 | 0.783    | 0.623 |
| LightGBM     | 0.776 | 0.052  | 0.936    | 0.598       | 0.939       | nan   | 0.978 | nan      | 0.284 |
| AdaBoost     | 0.926 | 0.487  | 0.97     | 0.884       | 0.904       | 0.701 | 0.981 | 0.777    | 0.622 |
| DecisionTree | 0.832 | 0.826  | 0.948    | 0.689       | 0.973       | nan   | 0.961 | nan      | 0.08  |
| GBDT         | 0.833 | 0.841  | 0.965    | 0.782       | 0.949       | 0.598 | 0.97  | 0.669    | 0.417 |
| GNB          | 0.946 | 0.011  | 0.89     | 0.945       | 0.903       | 0.288 | 0.995 | 0.439    | 0.392 |
| MLP          | 0.586 | 0.274  | 0.675    | 0.513       | 0.843       | 0.091 | 0.969 | 0.146    | 0.075 |
| SVM          | 0.906 | 0.042  | 0.901    | 0.905       | 0.886       | 0.305 | 0.99  | 0.449    | 0.396 |

**Supplementary Table S15. Performance of machine learning algorithms (Predicting re-admission within 1 month after discharge for all the patients included).**

| Model        | AUC   | Cutoff | Accuracy | Sensitivity | Specificity | PPV   | NPV   | F1 score | Kappa |
|--------------|-------|--------|----------|-------------|-------------|-------|-------|----------|-------|
| Logistic     | 0.630 | 0.233  | 0.608    | 0.586       | 0.615       | 0.319 | 0.839 | 0.398    | 0.153 |
| XGBoost      | 0.886 | 0.285  | 0.813    | 0.808       | 0.816       | 0.569 | 0.934 | 0.666    | 0.541 |
| LightGBM     | 0.653 | 0.240  | 0.766    | 0.458       | 0.792       | nan   | 0.816 | nan      | 0.18  |
| AdaBoost     | 0.731 | 0.434  | 0.622    | 0.783       | 0.576       | 0.351 | 0.9   | 0.484    | 0.248 |
| DecisionTree | 0.576 | 0.31   | 0.773    | 0.473       | 0.679       | nan   | 0.773 | nan      | 0.0   |
| GBDT         | 0.596 | 0.228  | 0.729    | 0.539       | 0.638       | nan   | 0.79  | nan      | 0.029 |
| GNB          | 0.634 | 0.187  | 0.613    | 0.616       | 0.613       | 0.317 | 0.844 | 0.417    | 0.168 |
| SVM          | 0.514 | 0.241  | 0.499    | 0.598       | 0.472       | 0.249 | 0.806 | 0.339    | 0.044 |
| MLP          | 0.526 | 0.261  | 0.539    | 0.53        | 0.542       | 0.276 | 0.793 | 0.315    | 0.056 |

**Supplementary Table S16. Performance of machine learning algorithms (Predicting mortality within 180 days after discharge for all the patients included).**

| Model        | AUC   | Cutoff | Accuracy | Sensitivity | Specificity | PPV   | NPV   | F1 score | Kappa |
|--------------|-------|--------|----------|-------------|-------------|-------|-------|----------|-------|
| Logistic     | 0.827 | 0.169  | 0.802    | 0.681       | 0.823       | 0.406 | 0.939 | 0.502    | 0.39  |
| XGBoost      | 0.988 | 0.299  | 0.962    | 0.953       | 0.965       | 0.834 | 0.99  | 0.887    | 0.861 |
| LightGBM     | 0.805 | 0.158  | 0.843    | 0.687       | 0.861       | nan   | 0.923 | nan      | 0.296 |
| AdaBoost     | 0.908 | 0.442  | 0.804    | 0.855       | 0.797       | 0.418 | 0.969 | 0.559    | 0.451 |
| DecisionTree | 0.923 | 0.337  | 0.805    | 0.949       | 0.78        | nan   | 0.948 | nan      | 0.348 |
| GBDT         | 0.858 | 0.335  | 0.896    | 0.737       | 0.958       | nan   | 0.91  | nan      | 0.338 |
| GNB          | 0.829 | 0.001  | 0.72     | 0.792       | 0.709       | 0.313 | 0.952 | 0.448    | 0.304 |
| MLP          | 0.559 | 0.292  | 0.786    | 0.365       | 0.858       | 0.303 | 0.891 | 0.3      | 0.184 |
| SVM          | 0.680 | 0.432  | 0.697    | 0.617       | 0.711       | 0.262 | 0.921 | 0.356    | 0.2   |

**Supplementary Table S17. Performance of machine learning algorithms (Predicting in-hospital mortality for patients admitted to the ICU).**

| Model        | AUC   | Cutoff | Accuracy | Sensitivity | Specificity | PPV   | NPV   | F1 score | Kappa |
|--------------|-------|--------|----------|-------------|-------------|-------|-------|----------|-------|
| Logistic     | 0.934 | 0.072  | 0.883    | 0.96        | 0.902       | 0.404 | 0.987 | 0.563    | 0.488 |
| XGBoost      | 0.963 | 0.328  | 0.956    | 0.96        | 0.947       | 0.786 | 0.979 | 0.84     | 0.698 |
| LightGBM     | 0.741 | 0.283  | 0.905    | 0.6         | 0.933       | nan   | 0.96  | nan      | 0.344 |
| AdaBoost     | 0.948 | 0.492  | 0.954    | 0.92        | 0.94        | 0.714 | 0.975 | 0.776    | 0.671 |
| DecisionTree | 0.873 | 0.827  | 0.906    | 0.8         | 0.932       | nan   | 0.933 | nan      | 0.062 |
| GBDT         | 0.962 | 0.649  | 0.934    | 0.96        | 0.927       | nan   | 0.965 | nan      | 0.501 |
| GNB          | 0.961 | 0.021  | 0.9      | 0.96        | 0.939       | 0.462 | 0.99  | 0.61     | 0.545 |
| MLP          | 0.897 | 0.321  | 0.882    | 0.86        | 0.94        | 0.408 | 0.982 | 0.54     | 0.47  |
| SVM          | 0.955 | 0.051  | 0.893    | 0.98        | 0.907       | 0.425 | 0.991 | 0.588    | 0.519 |

**Supplementary Table S18. Performance of machine learning algorithms (Predicting re-admission within 1 month after discharge for patients admitted to the ICU).**

| Model        | AUC   | Cutoff | Accuracy | Sensitivity | Specificity | PPV   | NPV   | F1 score | Kappa |
|--------------|-------|--------|----------|-------------|-------------|-------|-------|----------|-------|
| Logistic     | 0.651 | 0.19   | 0.67     | 0.554       | 0.698       | 0.286 | 0.876 | 0.374    | 0.18  |
| XGBoost      | 0.933 | 0.263  | 0.86     | 0.879       | 0.857       | 0.588 | 0.968 | 0.7      | 0.613 |
| LightGBM     | 0.792 | 0.186  | 0.765    | 0.801       | 0.676       | nan   | 0.915 | nan      | 0.3   |
| AdaBoost     | 0.830 | 0.445  | 0.761    | 0.736       | 0.769       | 0.414 | 0.928 | 0.526    | 0.381 |
| DecisionTree | 0.676 | 0.238  | 0.779    | 0.79        | 0.524       | nan   | 0.85  | nan      | 0.082 |
| GBDT         | 0.757 | 0.189  | 0.801    | 0.706       | 0.742       | nan   | 0.894 | nan      | 0.285 |
| GNB          | 0.650 | 0.198  | 0.615    | 0.623       | 0.616       | 0.26  | 0.88  | 0.366    | 0.15  |
| MLP          | 0.540 | 0.334  | 0.565    | 0.55        | 0.57        | 0.231 | 0.858 | 0.303    | 0.081 |
| SVM          | 0.596 | 0.301  | 0.651    | 0.499       | 0.686       | 0.285 | 0.866 | 0.329    | 0.137 |

**Supplementary Table S19. Performance of machine learning algorithms (Predicting mortality within 180 days after discharge for patients admitted to the ICU).**

| Model        | AUC   | Cutoff | Accuracy | Sensitivity | Specificity | PPV   | NPV   | F1 score | Kappa |
|--------------|-------|--------|----------|-------------|-------------|-------|-------|----------|-------|
| Logistic     | 0.837 | 0.233  | 0.812    | 0.708       | 0.842       | 0.539 | 0.914 | 0.611    | 0.487 |
| XGBoost      | 0.988 | 0.353  | 0.959    | 0.97        | 0.958       | 0.874 | 0.989 | 0.917    | 0.887 |
| LightGBM     | 0.771 | 0.347  | 0.833    | 0.663       | 0.857       | 0.63  | 0.876 | 0.644    | 0.452 |
| AdaBoost     | 0.919 | 0.458  | 0.824    | 0.857       | 0.817       | 0.561 | 0.953 | 0.674    | 0.559 |
| DecisionTree | 0.978 | 0.417  | 0.941    | 0.976       | 0.923       | 0.859 | 0.985 | 0.902    | 0.854 |
| GBDT         | 0.977 | 0.35   | 0.943    | 0.97        | 0.932       | 0.832 | 0.984 | 0.891    | 0.845 |
| GNB          | 0.829 | 0.003  | 0.735    | 0.779       | 0.726       | 0.427 | 0.924 | 0.551    | 0.383 |
| MLP          | 0.701 | 0.366  | 0.754    | 0.582       | 0.801       | 0.426 | 0.885 | 0.455    | 0.313 |
| SVM          | 0.694 | 0.637  | 0.749    | 0.574       | 0.797       | 0.433 | 0.881 | 0.463    | 0.31  |

**Supplementary Table S20. Performance of machine learning algorithms (Predicting in-hospital mortality for patients underwent operations during ICU treatment).**

| Model        | AUC   | Cutoff | Accuracy | Sensitivity | Specificity | PPV   | NPV   | F1 score | Kappa |
|--------------|-------|--------|----------|-------------|-------------|-------|-------|----------|-------|
| Logistic     | 0.940 | 0.109  | 0.927    | 0.867       | 0.946       | 0.499 | 0.988 | 0.63     | 0.588 |
| XGBoost      | 0.987 | 0.345  | 0.972    | 0.953       | 0.972       | 0.807 | 0.993 | 0.858    | 0.824 |
| LightGBM     | 0.828 | 0.083  | 0.915    | 0.704       | 0.929       | nan   | 0.962 | nan      | 0.297 |
| AdaBoost     | 0.971 | 0.51   | 0.978    | 0.954       | 0.978       | 0.876 | 0.992 | 0.9      | 0.859 |
| DecisionTree | 0.891 | 0.967  | 0.93     | 0.787       | 0.994       | nan   | 0.93  | nan      | 0.0   |
| GBDT         | 0.973 | 0.895  | 0.963    | 0.942       | 0.981       | nan   | 0.963 | nan      | 0.523 |
| GNB          | 0.957 | 0.837  | 0.934    | 0.902       | 0.939       | 0.521 | 0.989 | 0.66     | 0.616 |
| MLP          | 0.845 | 0.367  | 0.877    | 0.75        | 0.889       | 0.336 | 0.977 | 0.459    | 0.396 |
| SVM          | 0.956 | 0.091  | 0.954    | 0.861       | 0.96        | 0.636 | 0.987 | 0.728    | 0.691 |

**Supplementary Table S21. Performance of machine learning algorithms (Predicting re-admission within 1 month after discharge for patients underwent operations during ICU treatment).**

| Model        | AUC   | Cutoff | Accuracy | Sensitivity | Specificity | PPV   | NPV   | F1 score | Kappa |
|--------------|-------|--------|----------|-------------|-------------|-------|-------|----------|-------|
| Logistic     | 0.658 | 0.193  | 0.695    | 0.58        | 0.726       | 0.319 | 0.884 | 0.41     | 0.225 |
| XGBoost      | 0.908 | 0.279  | 0.846    | 0.846       | 0.844       | 0.575 | 0.956 | 0.678    | 0.576 |
| LightGBM     | 0.761 | 0.188  | 0.763    | 0.81        | 0.609       | 0.412 | 0.902 | 0.535    | 0.312 |
| AdaBoost     | 0.828 | 0.428  | 0.768    | 0.745       | 0.776       | 0.424 | 0.929 | 0.539    | 0.397 |
| DecisionTree | 0.579 | 0.682  | 0.818    | 0.353       | 0.804       | nan   | 0.818 | nan      | 0.0   |
| GBDT         | 0.664 | 0.487  | 0.785    | 0.517       | 0.766       | nan   | 0.861 | nan      | 0.144 |
| GNB          | 0.621 | 0.179  | 0.607    | 0.541       | 0.68        | 0.266 | 0.875 | 0.349    | 0.143 |
| MLP          | 0.620 | 0.266  | 0.67     | 0.563       | 0.678       | 0.288 | 0.871 | 0.372    | 0.166 |
| SVM          | 0.555 | 0.187  | 0.758    | 0.308       | 0.88        | 0.353 | 0.849 | 0.318    | 0.18  |

**Supplementary Table S22. Performance of machine learning algorithms (Predicting mortality within 180 days after discharge for patients underwent operations during ICU treatment).**

| Model        | AUC   | Cutoff | Accuracy | Sensitivity | Specificity | PPV   | NPV   | F1 score | Kappa |
|--------------|-------|--------|----------|-------------|-------------|-------|-------|----------|-------|
| Logistic     | 0.829 | 0.117  | 0.767    | 0.759       | 0.77        | 0.323 | 0.957 | 0.447    | 0.33  |
| XGBoost      | 0.982 | 0.23   | 0.939    | 0.943       | 0.94        | 0.701 | 0.99  | 0.799    | 0.76  |
| LightGBM     | 0.812 | 0.129  | 0.818    | 0.765       | 0.791       | nan   | 0.946 | nan      | 0.309 |
| AdaBoost     | 0.911 | 0.426  | 0.799    | 0.873       | 0.79        | 0.367 | 0.976 | 0.514    | 0.412 |
| DecisionTree | 0.765 | 0.215  | 0.846    | 0.811       | 0.66        | nan   | 0.906 | nan      | 0.135 |
| GBDT         | 0.912 | 0.489  | 0.924    | 0.887       | 0.908       | 0.745 | 0.971 | 0.789    | 0.717 |
| GNB          | 0.825 | 0.004  | 0.711    | 0.816       | 0.698       | 0.273 | 0.963 | 0.407    | 0.274 |
| MLP          | 0.626 | 0.335  | 0.694    | 0.554       | 0.714       | 0.233 | 0.921 | 0.311    | 0.167 |
| SVM          | 0.677 | 0.128  | 0.807    | 0.462       | 0.856       | 0.324 | 0.919 | 0.368    | 0.259 |

\* Logistic, Logistic regression; XGBoost, eXtreme Gradient Boosting; LightBGM, Light Gradient Boosting Machine; AdaBoost, Adaptive Boosting; GBDT, Gradient Boosting Decision Tree; GNB, Gaussian Naive Bayes; MLP, Multi-Layer Perceptron; SVM, Support Vector Machine.

**Supplementary Table S23. Variables of patients underwent biliary drainage during ICU treatment in Zhongda Hospital (n= 61).**

| Variables                                                | n (%), mean $\pm$ SD (range), or Med [IQR] |
|----------------------------------------------------------|--------------------------------------------|
| In-hospital mortality, n (%)                             | 5 (8.2%)                                   |
| Re-admission within 1 month after discharge, n (%)       | 15 (24.2%)                                 |
| Mortality within 180 days after discharge, n (%)         | 12 (19.7%)                                 |
| AKI stage, n (%)                                         |                                            |
| 0                                                        | 42 (68.9%)                                 |
| 1                                                        | 9 (14.8%)                                  |
| 2                                                        | 4 (6.5%)                                   |
| 3                                                        | 6 (9.8%)                                   |
| Duration of auxiliary ventilation (hours)                | 18 [12.5-65.5]                             |
| Duration of intravenous catheterization (hours)          | 193 [141-364.5]                            |
| Duration of vasopressor drug use (hours)                 | 29 [0-63]                                  |
| APSO score                                               | 17 [15-24.5]                               |
| LODS score                                               | 19.5 $\pm$ 4.7 (10-36)                     |
| OASIS score                                              | 28.6 $\pm$ 10.3 (8-50)                     |
| SOFA score                                               | 7 [5-11]                                   |
| GCS score                                                | 9.5 [7-12]                                 |
| SpO <sub>2</sub> on the first day of ICU _ min (%)       | 93 [90.5-96]                               |
| Temperature on the first day of ICU admission _ min (°C) | 36.4 [36.1-37]                             |
| Albumin _ min (g/dL)                                     | 31.1 [27.1-33.1]                           |
| ALP _ max (IU/L)                                         | 234 [144.5-362.5]                          |
| ALP _ avg (IU/L)                                         | 204.5 [112.8-265]                          |
| ALP _ min (IU/L)                                         | 122 [72-185.5]                             |
| Anion gap _ max (mEq/L)                                  | 10.3 [8.2-13.5]                            |
| Anion gap _ avg (mEq/L)                                  | 8.5 $\pm$ 2.5 (2.4-17.2)                   |
| Bicarbonate _ max (mEq/L)                                | 25.4 [22.5-29.8]                           |
| Bicarbonate _ avg (mEq/L)                                | 22.4 $\pm$ 2.8 (15.5-29.3)                 |
| Bicarbonate _ min (mEq/L)                                | 18.7 $\pm$ 3.1 (11.9-25.7)                 |
| Chloride _ max (mEq/L)                                   | 110.5 [107.2-112.8]                        |
| Glucose _ avg (mg/dL)                                    | 9.1 [7.6-12.2]                             |
| Lactate _ max (mmol/L)                                   | 2.4 [1.5-4.1]                              |
| Lipase _ max (IU/L)                                      | 3873 [794.5-4056]                          |
| Lipase _ avg (IU/L)                                      | 2071 [452-2172]                            |
| MCHC _ avg (%)                                           | 329 $\pm$ 9.7 (302-357)                    |
| PH _ min (units)                                         | 7.327 [7.275-7.376]                        |
| Phosphate _ max (mg/dL)                                  | 1.2 [1-1.5]                                |
| PTT _ max (seconds)                                      | 35.9 [31.7-41.7]                           |
| RDW _ max (%)                                            | 14.4 [13.5-15.3]                           |
| RDW _ avg (%)                                            | 13.9 [13.2-14.8]                           |
| RDW _ min (%)                                            | 13.2 [12.7-13.9]                           |
| TBil _ min (mg/dL)                                       | 32.7 [15.7-58.8]                           |
| Urea nitrogen _ max (mg/dL)                              | 10.7 [7.6-14.3]                            |



|                             |                |
|-----------------------------|----------------|
| Urea nitrogen _ avg (mg/dL) | 8.6 [6-10.4]   |
| Urea nitrogen _ min (mg/dL) | 5.2 [3.7-7.4]  |
| WBC _ min (K/uL)            | 8.9 [6.6-12.5] |

\* ICU, intensive care unit; SD, standard deviation; IQR, inter-quartile range; AKI, acute kidney injury; APSIII, acute physiology score iii; LODS, logistic organ dysfunction system; OASIS, oxford acute severity of illness score; SOFA, sepsis-related organ failure; GCS, glasgow coma scale; ALP, alkaline phosphatase; MCHC, mean corpuscular hemoglobin concentration; PTT, partial thromboplastin time; RDW, red blood cell distribution width; TBil, total bilirubin; WBC, white blood cells.
